# Supplementary material for: Regioselective benzoylation of unprotected β-glycopyranosides with benzoyl cyanide and an amine catalyst – application to saponin synthesis
Source: Royal Society of Chemistry journal article supplement (doi:10.1039/d0qo01243b), 2020-11-16

Supporting Information for

**Regioselective Benzoylation of Unprotected  $\beta$ -Glycopyranosides with  
Benzoyl Cyanide and an Amine Catalyst – Application to Saponin  
Synthesis**

Tianlu Li,<sup>\*a,b</sup> Tong Li,<sup>a</sup> Yajing Sun,<sup>a</sup> Yue Yang,<sup>a</sup> Panpan Lv,<sup>a</sup> Fengshan Wang,<sup>a,b</sup>  
Hongxiang Lou,<sup>a,b</sup> Richard R. Schmidt<sup>\*c</sup> and Peng Peng<sup>\* a,b</sup>

<sup>a</sup>*National Glycoengineering Research Center, Shandong University, Jinan, 250012, Shandong, China.*

<sup>b</sup>*Key Laboratory of Chemical Biology (Ministry of Education), Institute of Biochemical and Biotechnological Drugs, School of Pharmaceutical Sciences, Shandong University, Jinan, 250012, Shandong, China*

<sup>c</sup>*Department of Chemistry, University of Konstanz, Konstanz D-78457, Germany*

Email: [richard.schmidt@uni-konstanz.de](mailto:richard.schmidt@uni-konstanz.de) and [pengpeng@sdu.edu.cn](mailto:pengpeng@sdu.edu.cn).

**Table of Content**

|                                                                             |     |
|-----------------------------------------------------------------------------|-----|
| <b>General Procedures</b>                                                   | S2  |
| <b>Procedures for Et<sub>3</sub>N catalyzed regioselective benzoylation</b> | S2  |
| <b>Procedures for PPY catalyzed regioselective benzoylation</b>             | S13 |
| <b>Application to saponin synthesis</b>                                     | S19 |
| <b>References</b>                                                           | S26 |
| <b>Copies of NMR spectra</b>                                                | S27 |

## Experimental Section

### General Procedures

All reagents and solvents were dried prior to use according to standard methods. Commercial reagents were used without further purification, unless otherwise stated.  $^1\text{H}$  NMR spectra were recorded on an Advance DRX Bruker-400 MHz and 600 MHz spectrometer at 25 °C. High-resolution mass spectrometry was performed on a Thermo Electron LTQ-Orbitrap XL. All reactions were performed in flame-dried modified Schlenk (Kjeldahl shape) flasks fitted with a glass stopper or rubber septa under a positive pressure of argon and away from light. Analytical TLC was performed on silica gel 60-F254 precoated on aluminum plates (E. Merck), with detection by fluorescence and/or by staining with acidic ceric ammonium molybdate. Column chromatography was performed employing Silica Gel 230-400 mesh.

### (1) Procedures for Et<sub>3</sub>N catalyzed cyanide-mediated regioselective benzylation of unprotected $\beta$ -D-glucopyranosides.

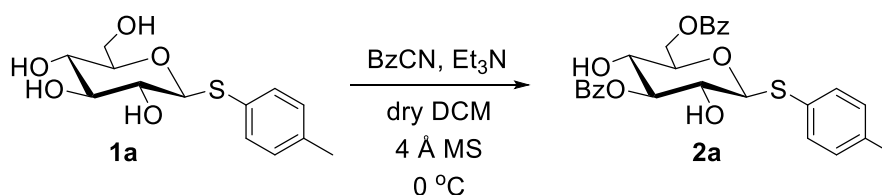

#### 4-Methylphenyl 3,6-di-O-benzoyl-1-thio- $\beta$ -D-glucopyranoside (**2a**)<sup>1-2</sup>

To a solution of compound **1a** (30 mg, 104.9  $\mu\text{mol}$ ) and 4 Å molecular sieves in 10 mL mixture of DCM was added benzoyl cyanide (28.2 mg, 215.0  $\mu\text{mol}$ ) at room temperature under argon atmosphere. After cooling down the reaction mixture to 0 °C, Et<sub>3</sub>N (1.5  $\mu\text{L}$ , 10.8  $\mu\text{mol}$ ) was added. The reaction was further stirred for 9 h at this temperature. After the TLC analysis showed the reaction was complete, the reaction was quenched by addition of MeOH. Then the mixture was filtered through a pad of Celite and the Celite was further washed with DCM for 3 times. Then the organic layer was concentrated. The residue was purified by column chromatography on silica gel to afford compound **2a** (44.0 mg, 85%) as semisolid.  $^1\text{H}$  NMR (400 MHz, CDCl<sub>3</sub>)  $\delta$  8.08 – 8.04 (m, 4H, ArH), 7.62 (t,  $J = 7.4$  Hz, 1H, ArH), 7.56 (t,  $J = 7.5$  Hz, 1H, ArH), 7.51 – 7.39 (m, 6H, ArH), 6.98 (d,  $J = 7.8$  Hz, 2H, ArH), 5.25 (t,  $J = 9.0$  Hz, 1H,

3-H), 4.69 (d,  $J = 3.4$  Hz, 2H), 4.61 (d,  $J = 9.7$  Hz, 1H), 3.80 – 3.73 (m, 1H), 3.70 (td,  $J = 9.4, 4.5$  Hz, 1H), 3.57 (td,  $J = 9.4, 2.6$  Hz, 1H), 3.36 (d,  $J = 5.0$  Hz, 1H), 2.75 (d,  $J = 3.1$  Hz, 1H, OH), 2.30 (s, 3H,  $CH_3$ ).

**1 mmol-scale preparation:** To a solution of compound **1a** (300 mg, 1.05 mmol) and 4 Å molecular sieves in 100 mL mixture of DCM was added benzoyl cyanide (275 mg, 2.1 mmol) at room temperature under argon atmosphere. After cooling down the reaction mixture to 0 °C,  $Et_3N$  (14.6  $\mu$ L, 105  $\mu$ mol) was added. The reaction was further stirred for 10 h at this temperature. After the TLC analysis showed the reaction was complete, the reaction was quenched by addition of  $NH_4Cl$  (s) and MeOH. Then the mixture was filtered through a pad of Celite and the Celite was further washed with DCM for 3 times. Then the organic layer was concentrated. The residue was purified by column chromatography on silica gel to afford compound **2a** (435.7 mg, 84%) as semisolid.

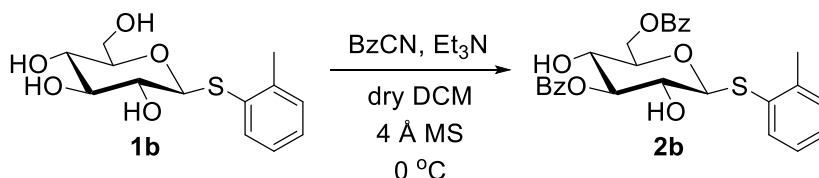

### 2-Methylphenyl 3,6-di-O-benzoyl-1-thio- $\beta$ -D-glucopyranoside (**2b**)

To a solution of compound **1b** (30 mg, 104.9  $\mu$ mol) and 4 Å molecular sieves in 10 mL mixture of DCM was added benzoyl cyanide (28.2 mg, 215.0  $\mu$ mol) at room temperature under argon atmosphere. After cooling down the reaction mixture to 0 °C,  $Et_3N$  (1.5  $\mu$ L, 10.8  $\mu$ mol) was added. The reaction was further stirred for 6 h at this temperature. After the TLC analysis showed the reaction was complete, the reaction was quenched by addition of MeOH. Then the mixture was filtered through a pad of Celite and the Celite was further washed with DCM for 3 times. Then the organic layer was concentrated. The residue was purified by column chromatography on silica gel to afford compound **2b** (42.0 mg, 81%) as semisolid.  $^1H$  NMR (400 MHz,  $CDCl_3$ )  $\delta$  8.14 – 7.98 (m, 4H, ArH), 7.66 – 7.53 (m, 3H, ArH), 7.44 (dt,  $J = 13.4, 7.7$  Hz, 4H, ArH), 7.18 (d,  $J = 4.0$  Hz, 2H, ArH), 7.00 (dt,  $J = 8.6, 4.3$  Hz, 1H, ArH), 5.26 (t,  $J = 8.8$  Hz, 1H, 3-H), 4.81 – 4.53 (m, 3H, 1-H, 6-H<sub>a</sub>, 6-H<sub>b</sub>), 3.86 – 3.63 (m, 3H, 2-H, 4-H,

5-H), 3.33 (d,  $J = 4.6$  Hz, 1H, OH), 2.76 (d,  $J = 3.2$  Hz, 1H, OH), 2.44 (s, 3H, CH<sub>3</sub>).  
<sup>13</sup>C NMR (100 MHz, CDCl<sub>3</sub>)  $\delta$  167.8, 166.8, 140.6, 133.6, 133.33, 133.28, 131.2, 130.4, 130.0, 129.8, 129.6, 129.2, 128.44, 128.39, 128.3, 126.6, 88.5, 79.7, 78.2, 70.7, 69.2, 63.8, 21.1. HRMS (ESI) Calcd for C<sub>27</sub>H<sub>27</sub>O<sub>7</sub>S<sup>+</sup> [M + H]<sup>+</sup>: 495.1472, found: 495.1471; C<sub>27</sub>H<sub>26</sub>NaO<sub>7</sub>S<sup>+</sup> [M + Na]<sup>+</sup>: 517.1291, found: 517.1287.

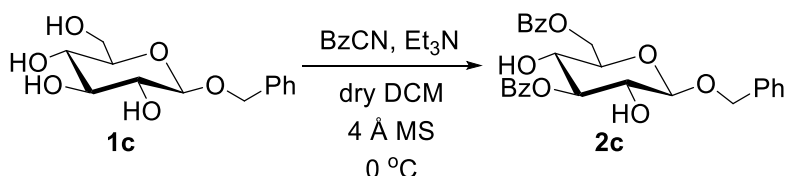

### Benzyl 3,6-di-O-benzoyl- $\beta$ -D-glucopyranoside (2c)

To a solution of compound **1c** (30 mg, 111.1  $\mu$ mol) and 4 Å molecular sieves in 10 mL mixture of DCM was added benzoyl cyanide (30 mg, 229.0  $\mu$ mol) at room temperature under argon atmosphere. After cooling down the reaction mixture to 0 °C, Et<sub>3</sub>N (1.5  $\mu$ L, 11.1  $\mu$ mol) was added. The reaction was further stirred for 7 h at this temperature. After the TLC analysis showed the reaction was complete, the reaction was quenched by addition of MeOH. Then the mixture was filtered through a pad of Celite and the Celite was further washed with DCM for 3 times. Then the organic layer was concentrated. The residue was purified by column chromatography on silica gel to afford compound **2c** (41.5 mg, 78%) as semisolid. <sup>1</sup>H NMR (400 MHz, CDCl<sub>3</sub>)  $\delta$  8.13 – 8.02 (m, 4H, ArH), 7.63 – 7.53 (m, 2H, ArH), 7.52 – 7.40 (m, 4H, ArH), 7.38 – 7.28 (m, 5H, ArH), 5.20 (t,  $J = 9.1$  Hz, 1H, 3-H), 4.94 (d,  $J = 11.7$  Hz, 1H, PhCH<sub>2</sub>), 4.76 – 4.63 (m, 3H, PhCH<sub>2</sub>, 6-H<sub>a</sub>, 6-H<sub>b</sub>), 4.52 (d,  $J = 7.7$  Hz, 1H, 1-H), 3.84 – 3.64 (m, 3H, 2-H, 4-H, 5-H), 3.36 (d,  $J = 4.6$  Hz, 1H, OH), 2.58 (d,  $J = 3.1$  Hz, 1H, OH). <sup>13</sup>C NMR (100 MHz, CDCl<sub>3</sub>)  $\delta$  166.7, 165.9, 135.6, 132.5, 132.3, 129.0, 128.8, 128.7, 128.3, 127.5, 127.4, 127.2, 127.1, 100.5, 77.3, 73.5, 71.2, 70.1, 68.5, 62.7. HRMS (ESI) Calcd for C<sub>27</sub>H<sub>27</sub>O<sub>8</sub><sup>+</sup> [M + H]<sup>+</sup>: 479.1700, found: 479.1698; C<sub>27</sub>H<sub>30</sub>NO<sub>8</sub><sup>+</sup> [M + NH<sub>4</sub>]<sup>+</sup>: 496.1966 found: 496.1961.

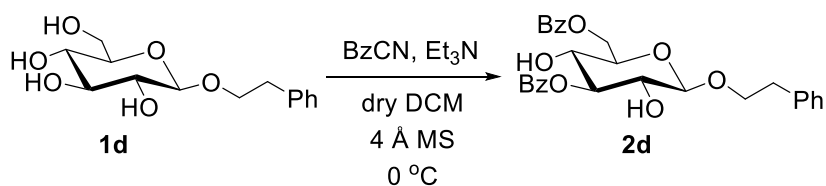

## 2-Phenylethyl 3,6-di-*O*-benzoyl- $\beta$ -D-glucopyranoside (**2d**)

To a solution of compound **1d** (30 mg, 105.6  $\mu$ mol) and 4 Å molecular sieves in 10 mL mixture of DCM was added benzoyl cyanide (29 mg, 221.3  $\mu$ mol) at room temperature under argon atmosphere. After cooling down the reaction mixture to 0 °C, Et<sub>3</sub>N (1.5  $\mu$ L, 10.7  $\mu$ mol) was added. The reaction was further stirred for 6 h at this temperature. After the TLC analysis showed the reaction was complete, the reaction was quenched by addition of MeOH. Then the mixture was filtered through a pad of Celite and the Celite was further washed with DCM for 3 times. Then the organic layer was concentrated. The residue was purified by column chromatography on silica gel to afford compound **2d** (43.6 mg, 84%) as semisolid. <sup>1</sup>H NMR (400 MHz, CDCl<sub>3</sub>)  $\delta$  8.15 – 7.98 (m, 4H, ArH), 7.62 – 7.55 (m, 2H, ArH), 7.48 – 7.38 (m, 4H, ArH), 7.31 – 7.15 (m, 6H, ArH), 5.20 (t, *J* = 8.9 Hz, 1H, 3-H), 4.69 (dd, *J* = 12.1, 4.4 Hz, 1H, 6-H<sub>a</sub>), 4.63 (dd, *J* = 12.1, 2.1 Hz, 1H, 6-H<sub>b</sub>), 4.44 (d, *J* = 7.7 Hz, 1H, 1-H), 4.18 (dt, *J* = 9.7, 6.8 Hz, 1H, OCH<sub>2</sub>), 3.85 – 3.58 (m, 4H, 2-H, 4-H, 5-H, OCH<sub>2</sub>), 3.40 (d, *J* = 4.0 Hz, 1H, OH), 3.01 – 2.88 (m, 2H, PhCH<sub>2</sub>), 2.38 (s, 1H, OH). <sup>13</sup>C NMR (100 MHz, CDCl<sub>3</sub>)  $\delta$  167.7, 166.9, 138.2, 133.5, 133.2, 130.0, 129.8, 129.6, 129.3, 128.8, 128.44, 128.40, 128.39, 126.4, 103.0, 78.2, 74.5, 72.2, 71.0, 69.4, 63.7, 36.1. HRMS (ESI) Calcd for C<sub>28</sub>H<sub>29</sub>O<sub>8</sub><sup>+</sup> [M + H]<sup>+</sup>: 493.1857, found: 493.1858; C<sub>27</sub>H<sub>32</sub>NO<sub>8</sub><sup>+</sup> [M + NH<sub>4</sub>]<sup>+</sup>: 510.2122, found: 510.2123; C<sub>27</sub>H<sub>28</sub>NaO<sub>8</sub><sup>+</sup> [M + Na]<sup>+</sup>: 515.1676, found: 515.1665.

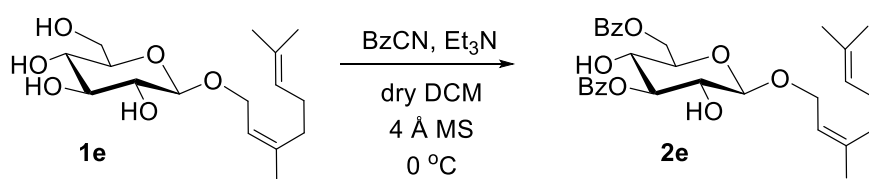

## (2Z)-3,7-dimethyl-2,6-octadien-1-yl 3,6-di-*O*-benzoyl- $\beta$ -D-glucopyranoside (**2e**)

To a solution of compound **1e** (34 mg, 107  $\mu$ mol) and 4 Å molecular sieves in 10 mL mixture of DCM was added benzoyl cyanide (28.2 mg, 215  $\mu$ mol) at room temperature under argon atmosphere. After cooling down the reaction mixture to 0 °C, Et<sub>3</sub>N (1.5  $\mu$ L, 10.7  $\mu$ mol) was added. The reaction was further stirred for 5 h at this temperature. After the TLC analysis showed the reaction was complete, the reaction was quenched by addition of MeOH. Then the mixture was filtered through a pad of Celite and the Celite was further washed with DCM for 3 times. Then the organic

layer was concentrated. The residue was purified by column chromatography on silica gel to afford compound **2e** (48 mg, 85%) as semisolid.  $^1\text{H}$  NMR (400 MHz,  $\text{CDCl}_3$ )  $\delta$  8.11 – 8.01 (m, 4H, *ArH*), 7.62 – 7.54 (m, 2H, *ArH*), 7.44 (td,  $J = 7.7, 3.4$  Hz, 4H, *ArH*), 5.37 (t,  $J = 7.3$  Hz, 1H,  $\text{C}=\text{CH}$ ), 5.24 (t,  $J = 8.9$  Hz, 1H, 3-H), 5.09 – 4.99 (m, 1H,  $\text{C}=\text{CH}$ ), 4.72 – 4.56 (m, 2H, 6- $\text{H}_a$ , 6- $\text{H}_b$ ), 4.48 (d,  $J = 7.8$  Hz, 1H, 1-H), 4.34 (dd,  $J = 11.9, 6.4$  Hz, 1H,  $\text{OCH}_2$ ), 4.23 (dd,  $J = 11.9, 7.9$  Hz, 1H,  $\text{OCH}_2$ ), 3.87 – 3.57 (m, 3H, 2-H, 4-H, 5-H), 3.41 (d,  $J = 4.3$  Hz, 1H, *OH*), 2.60 (d,  $J = 2.7$  Hz, 1H, *OH*), 2.19 – 1.96 (m, 4H,  $\text{CH}_2$ ), 1.75 (s, 3H,  $\text{CH}_3$ ), 1.65 (s, 3H,  $\text{CH}_3$ ), 1.57 (s, 3H,  $\text{CH}_3$ ).  $^{13}\text{C}$  NMR (100 MHz,  $\text{CDCl}_3$ )  $\delta$  167.7, 166.9, 142.2, 133.4, 133.2, 132.2, 130.0, 129.8, 129.7, 129.4, 128.38, 128.35, 123.5, 120.3, 101.3, 78.3, 74.4, 72.1, 69.5, 65.5, 63.8, 32.1, 26.6, 25.7, 23.5, 17.7. HRMS (ESI) Calcd for  $\text{C}_{30}\text{H}_{37}\text{O}_8^+$  [ $\text{M} + \text{H}$ ] $^+$ : 525.2483, found: 525.2484;  $\text{C}_{30}\text{H}_{40}\text{NO}_8^+$  [ $\text{M} + \text{NH}_4$ ] $^+$ : 542.2748, found: 542.2751;  $\text{C}_{30}\text{H}_{36}\text{NaO}_8^+$  [ $\text{M} + \text{Na}$ ] $^+$ : 547.2302, found: 547.2297.

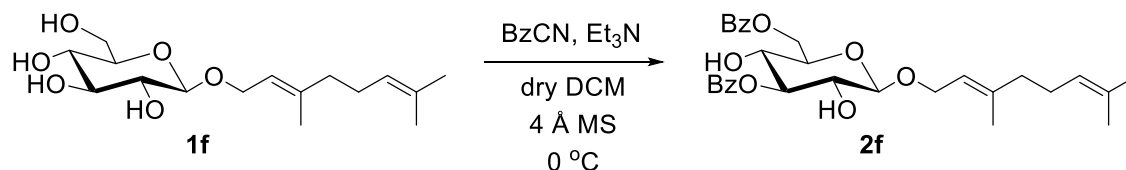

**(2E)-3,7-dimethyl-2,6-octadien-1-yl 3,6-di-O-benzoyl- $\beta$ -D-glucopyranoside (2f)**

To a solution of compound **1f** (30 mg, 94.9  $\mu\text{mol}$ ) and 4 Å molecular sieves in 10 mL mixture of DCM was added benzoyl cyanide (24.9 mg, 190  $\mu\text{mol}$ ) at room temperature under argon atmosphere. After cooling down the reaction mixture to 0 °C,  $\text{Et}_3\text{N}$  (1.3  $\mu\text{L}$ , 9.5  $\mu\text{mol}$ ) was added. The reaction was further stirred for 5 h at this temperature. After the TLC analysis showed the reaction was complete, the reaction was quenched by addition of MeOH. Then the mixture was filtered through a pad of Celite and the Celite was further washed with DCM for 3 times. Then the organic layer was concentrated. The residue was purified by column chromatography on silica gel to afford compound **2f** (43.0 mg, 86%) as semisolid.  $^1\text{H}$  NMR (400 MHz,  $\text{CDCl}_3$ )  $\delta$  8.15 – 8.02 (m, 4H, *ArH*), 7.63 – 7.53 (m, 2H, *ArH*), 7.50 – 7.38 (m, 4H, *ArH*), 5.36 (t,  $J = 7.2$  Hz, 1H,  $\text{C}=\text{CH}$ ), 5.23 (t,  $J = 9.0$  Hz, 1H, 3-H), 5.11 – 5.02 (m, 1H,  $\text{C}=\text{CH}$ ), 4.72 – 4.59 (m, 2H, 6- $\text{H}_a$ , 6- $\text{H}_b$ ), 4.48 (d,  $J = 7.8$  Hz, 1H, 1-H), 4.36 (dd,  $J = 11.9, 6.4$

Hz, 1H, OCH<sub>2</sub>), 4.27 (dd, *J* = 11.8, 7.9 Hz, 1H, OCH<sub>2</sub>), 3.81 – 3.64 (m, 3H, 2-H, 4-H, 5-H), 3.39 (d, *J* = 4.3 Hz, 1H, OH), 2.57 (d, *J* = 2.7 Hz, 1H, OH), 2.14 – 2.00 (m, 4H, CH<sub>2</sub>), 1.69 (s, 3H, CH<sub>3</sub>), 1.65 (s, 3H, CH<sub>3</sub>), 1.60 (s, 3H, CH<sub>3</sub>). <sup>13</sup>C NMR (100 MHz, CDCl<sub>3</sub>) δ 167.7, 166.9, 142.3, 133.5, 133.2, 131.8, 130.0, 129.8, 129.7, 129.3, 128.4, 128.3, 123.7, 119.2, 100.9, 78.4, 74.5, 72.1, 69.5, 65.5, 63.8, 39.5, 26.2, 25.7, 17.7, 16.4. HRMS (ESI) Calcd for C<sub>30</sub>H<sub>37</sub>O<sub>8</sub><sup>+</sup> [M + H]<sup>+</sup>: 525.2483, found: 525.2482; C<sub>30</sub>H<sub>40</sub>NO<sub>8</sub><sup>+</sup> [M + NH<sub>4</sub>]<sup>+</sup>: 542.2748, found: 542.2746.

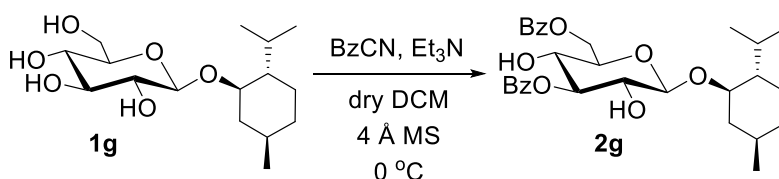

**(1*R*,2*S*,5*R*)-2-Isopropyl-5-methylcyclohexanyl 3,6-di-*O*-benzoyl-β-*D*-glucopyranoside (2g)**

To a solution of compound **1g** (30 mg, 94.3 μmol) and 4 Å molecular sieves in 10 mL mixture of DCM was added benzoyl cyanide (26.0 mg, 198.4 μmol) at room temperature under argon atmosphere. After cooling down the reaction mixture to 0 °C, Et<sub>3</sub>N (1.4 μL, 10.0 μmol) was added. The reaction was further stirred for 6 h at this temperature. After the TLC analysis showed the reaction was complete, the reaction was quenched by addition of MeOH. Then the mixture was filtered through a pad of Celite and the Celite was further washed with DCM for 3 times. Then the organic layer was concentrated. The residue was purified by column chromatography on silica gel to afford compound **2g** (35.2 mg, 71%) as semisolid. <sup>1</sup>H NMR (400 MHz, CDCl<sub>3</sub>) δ 8.05 – 7.95 (m, 4H, ArH), 7.55 – 7.48 (m, 2H, ArH), 7.41 – 7.33 (m, 4H, ArH), 5.15 (t, *J* = 8.9 Hz, 1H, 3-H), 4.65 – 4.52 (m, 2H, 6-H<sub>a</sub>, 6-H<sub>b</sub>), 4.47 (d, *J* = 7.7 Hz, 1H, 1-H), 3.72 – 3.62 (m, 2H, 4-H, 5-H), 3.59 (ddd, *J* = 9.8, 7.8, 2.3 Hz, 1H, 2-H), 3.46 (td, *J* = 10.8, 4.2 Hz, 1H), 3.19 (d, *J* = 4.0 Hz, 1H, OH), 2.31 (d, *J* = 2.4 Hz, 1H, OH), 2.16 (td, *J* = 7.0, 2.5 Hz, 1H), 2.01 (d, *J* = 12.4 Hz, 1H), 1.65 – 1.47 (m, 2H), 1.37 – 1.08 (m, 2H), 0.96 – 0.70 (m, 3H), 0.84 (d, *J* = 6.7 Hz, 3H), 0.79 (d, *J* = 6.7 Hz, 3H), 0.66 (d, *J* = 6.8 Hz, 3H). <sup>13</sup>C NMR (100 MHz, CDCl<sub>3</sub>) δ 167.7, 166.8, 133.4, 133.15, 130.0, 129.9, 129.8, 129.5, 128.4, 128.3, 99.9, 78.6, 77.7, 74.3, 72.2, 69.8, 63.8, 47.8,

40.6, 34.3, 31.5, 25.3, 23.2, 22.2, 20.8, 15.7. HRMS (ESI) Calcd for  $C_{30}H_{38}O_8^+$  [M + H]<sup>+</sup>: 527.2639, found: 527.2637;  $C_{30}H_{42}NO_8^+$  [M + NH<sub>4</sub>]<sup>+</sup>: 544.2905, found: 544.2901.

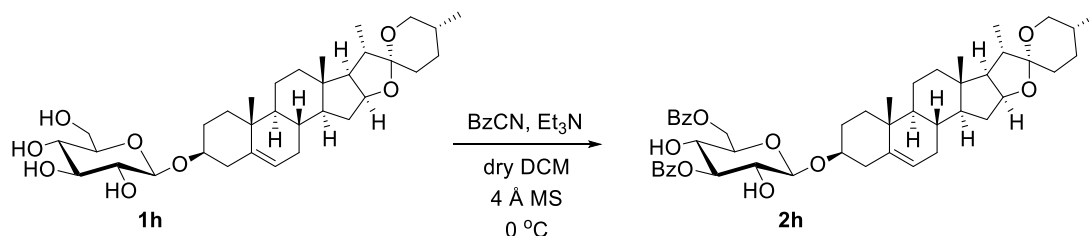

### Diosgenyl 3,6-di-*O*-benzoyl- $\beta$ -D-glucopyranoside (**2h**)<sup>3</sup>

To a solution of compound **1h** (30 mg, 52.0  $\mu$ mol) and 4 Å molecular sieves in 10 mL mixture of DCM was added benzoyl cyanide (13.6 mg, 104  $\mu$ mol) at room temperature under argon atmosphere. After cooling down the reaction mixture to 0 °C, Et<sub>3</sub>N (0.7  $\mu$ L, 5.2  $\mu$ mol) was added. The reaction was further stirred for 9 h at this temperature. After the TLC analysis showed the reaction was complete, the reaction was quenched by addition of MeOH. Then the mixture was filtered through a pad of Celite and the Celite was further washed with DCM for 3 times. Then the organic layer was concentrated. The residue was purified by column chromatography on silica gel to afford compound **2h** (34.3 mg, 84%) as semisolid. <sup>1</sup>H NMR (400 MHz, CDCl<sub>3</sub>)  $\delta$  8.10 – 8.05 (m, 4H, ArH), 7.60 – 7.56 (m, 2H, ArH), 7.47 – 7.42 (m, 4H, ArH), 5.34 (d, *J* = 4.9 Hz, 1H), 5.21 (t, *J* = 8.5 Hz, 1H), 4.72 – 4.60 (m, 2H), 4.55 (d, *J* = 7.7 Hz, 1H), 4.41 (q, *J* = 7.4 Hz, 1H), 3.76 – 3.74 (m, 2H), 3.68 (t, *J* = 8.7 Hz, 1H), 3.57 (dp, *J* = 10.6, 4.5 Hz, 1H), 3.48 (dd, *J* = 11.1, 4.1 Hz, 1H), 3.42 – 3.30 (m, 3H), 2.38 (dd, *J* = 13.3, 4.6 Hz, 1H), 2.29 (d, *J* = 12.0 Hz, 1H), 1.99 (dt, *J* = 22.5, 13.0 Hz, 3H), 1.87 (t, *J* = 6.9 Hz, 1H), 1.82 – 1.37 (m, 14H), 1.36 – 1.04 (m, 8H), 1.04 – 0.84 (m, 8H), 0.80 – 0.79 (m, 6H).

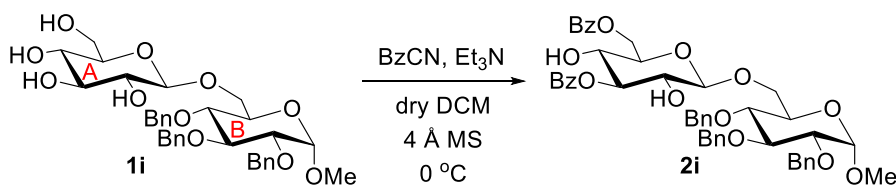

### Methyl 6-*O*-(3,6-di-*O*-benzoyl- $\beta$ -D-glucopyranosyl)-2,3,4-tri-*O*-benzyl- $\alpha$ -D-glucopyranoside (**2i**)



To a solution of compound **1i** (30 mg, 47.9  $\mu\text{mol}$ ) and 4 Å molecular sieves in 2 mL mixture of DCM was added benzoyl cyanide (12.5 mg, 95.7  $\mu\text{mol}$ ) at room temperature under argon atmosphere. After cooling down the reaction mixture to 0 °C, Et<sub>3</sub>N (0.7  $\mu\text{L}$ , 4.8  $\mu\text{mol}$ ) was added. The reaction was further stirred for 0.5 h at this temperature. After the TLC analysis showed the reaction was complete, the reaction was quenched by addition of MeOH. Then the mixture was filtered through a pad of Celite and the Celite was further washed with DCM for 3 times. Then the organic layer was concentrated. The residue was purified by column chromatography on silica gel to afford compound **2i** (35.2 mg, 88%) as semisolid. <sup>1</sup>H NMR (400 MHz, CDCl<sub>3</sub>)  $\delta$  8.13 – 7.96 (m, 4H, ArH), 7.61 – 7.53 (m, 2H, ArH), 7.49 – 7.39 (m, 4H, ArH), 7.37 – 7.23 (m, 15H, ArH), 5.17 (t, *J* = 9.2 Hz, 1H, 3<sub>A</sub>-H), 4.97 (d, *J* = 10.9 Hz, 1H, PhCH<sub>2</sub>), 4.89 (d, *J* = 11.0 Hz, 1H, PhCH<sub>2</sub>), 4.80 (d, *J* = 11.3 Hz, 1H, PhCH<sub>2</sub>), 4.77 (d, *J* = 11.0 Hz, 1H, PhCH<sub>2</sub>), 4.71 (dd, *J* = 12.2, 4.4 Hz, 1H, 6<sub>A</sub>-H<sub>a</sub>), 4.67 – 4.54 (m, 4H, PhCH<sub>2</sub>( $\times$ 2), 6<sub>A</sub>-H<sub>b</sub>, 1<sub>B</sub>-H), 4.39 (d, *J* = 7.7 Hz, 1H, 1<sub>A</sub>-H), 4.15 (dd, *J* = 11.0, 2.2 Hz, 1H, 6<sub>B</sub>-H<sub>a</sub>), 3.99 (t, *J* = 9.2 Hz, 1H, 3<sub>B</sub>-H), 3.83 (ddd, *J* = 10.2, 5.1, 2.1 Hz, 1H, 5<sub>B</sub>-H), 3.78 – 3.61 (m, 4H, 2<sub>A</sub>-H, 6<sub>B</sub>-H<sub>b</sub>, 5<sub>A</sub>-H, 4<sub>A</sub>-H), 3.55 – 3.45 (m, 2H, 2<sub>B</sub>-H, 4<sub>B</sub>-H), 3.36 (s, 3H, OCH<sub>3</sub>). <sup>13</sup>C NMR (100 MHz, CDCl<sub>3</sub>)  $\delta$  167.7, 167.0, 138.6, 138.1, 138.0, 133.5, 133.3, 130.0, 129.9, 129.5, 129.3, 128.45, 128.41, 128.38, 128.1, 127.9, 127.8, 127.6, 103.7, 98.1, 81.9, 79.6, 78.3, 77.9, 75.7, 75.0, 74.5, 73.3, 72.0, 69.7, 69.2, 69.1, 63.5, 55.3. HRMS (ESI) Calcd for C<sub>48</sub>H<sub>54</sub>NO<sub>13</sub><sup>+</sup> [M + NH<sub>4</sub>]<sup>+</sup>: 852.3590, found: 852.3603; C<sub>48</sub>H<sub>50</sub>NaO<sub>13</sub><sup>+</sup> [M + Na]<sup>+</sup>: 857.3144, found: 857.3139.

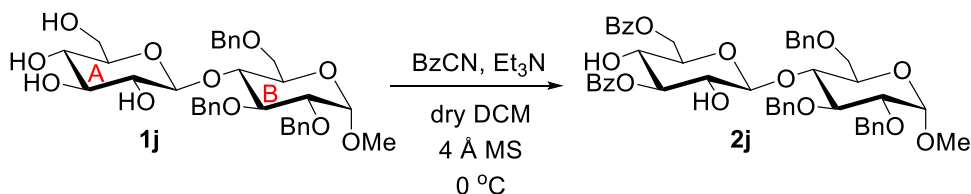

**Methyl 4-*O*-(3,6-di-*O*-benzoyl- $\beta$ -D-glucopyranosyl)-2,3,6-tri-*O*-benzyl- $\alpha$ -D-glucopyranoside (**2j**)**

To a solution of compound **1j** (30 mg, 47.9  $\mu\text{mol}$ ) and 4 Å molecular sieves in 2 mL mixture of DCM was added benzoyl cyanide (12.5 mg, 95.7  $\mu\text{mol}$ ) at room temperature under argon atmosphere. After cooling down the reaction mixture to 0 °C,

Et<sub>3</sub>N (0.7  $\mu$ L, 4.8  $\mu$ mol) was added. The reaction was further stirred for 0.5 h at this temperature. After the TLC analysis showed the reaction was complete, the reaction was quenched by addition of MeOH. Then the mixture was filtered through a pad of Celite and the Celite was further washed with DCM for 3 times. Then the organic layer was concentrated. The residue was purified by column chromatography on silica gel to afford compound **2j** (32.0 mg, 80%) as semisolid. <sup>1</sup>H NMR (400 MHz, CDCl<sub>3</sub>)  $\delta$  8.11 – 8.03 (m, 2H, ArH), 8.01 – 7.91 (m, 2H, ArH), 7.61 – 7.50 (m, 2H, ArH), 7.48 – 7.40 (m, 2H, ArH), 7.39 – 7.18 (m, 18H, ArH), 5.04 (d,  $J$  = 11.5 Hz, 1H, PhCH<sub>2</sub>), 5.01 (t,  $J$  = 9.2 Hz, 1H, 3<sub>A</sub>-H), 4.91 (d,  $J$  = 11.5 Hz, 1H, PhCH<sub>2</sub>), 4.71 (d,  $J$  = 12.0 Hz, 1H, PhCH<sub>2</sub>), 4.70 (d,  $J$  = 12.0 Hz, 1H, PhCH<sub>2</sub>), 4.63 (d,  $J$  = 7.8 Hz, 1H, 1<sub>A</sub>-H), 4.60 – 4.51 (m, 3H, 1<sub>B</sub>-H, PhCH<sub>2</sub>, 6<sub>A</sub>-H<sub>a</sub>), 4.49 (d,  $J$  = 12.0 Hz, 1H, PhCH<sub>2</sub>), 4.27 (dd,  $J$  = 12.2, 2.2 Hz, 1H, 6<sub>A</sub>-H<sub>b</sub>), 4.06 – 3.92 (m, 3H, 6<sub>B</sub>-H, 3<sub>B</sub>-H, 4<sub>B</sub>-H), 3.82 – 3.74 (m, 1H, 5<sub>B</sub>-H), 3.69 – 3.57 (m, 2H, 6<sub>B</sub>-H<sub>b</sub>, 4<sub>A</sub>-H), 3.57 – 3.47 (m, 2H, 2<sub>B</sub>-H, 2<sub>A</sub>-H), 3.43 (d,  $J$  = 3.2 Hz, 1H, OH), 3.35 (s, 3H, OCH<sub>3</sub>), 3.29 – 3.23 (m, 2H, 5<sub>A</sub>-H), 3.22 (d,  $J$  = 4.4 Hz, 1H, OH). <sup>13</sup>C NMR (100 MHz, CDCl<sub>3</sub>)  $\delta$  167.7, 167.1, 139.2, 138.0, 137.4, 133.4, 133.2, 130.0, 129.9, 129.52, 129.50, 128.5, 128.4, 128.32, 128.27, 128.18, 128.11, 127.9, 127.2, 127.0, 103.2, 98.3, 80.8, 79.3, 78.2, 75.0, 74.6, 73.7, 73.5, 73.0, 69.4, 68.9, 68.5, 63.4, 55.3. HRMS (ESI) Calcd for C<sub>48</sub>H<sub>54</sub>NO<sub>13</sub><sup>+</sup> [M + NH<sub>4</sub>]<sup>+</sup>: 852.3590, found: 852.3613; C<sub>48</sub>H<sub>50</sub>NaO<sub>13</sub><sup>+</sup> [M + Na]<sup>+</sup>: 857.3144, found: 857.3145.

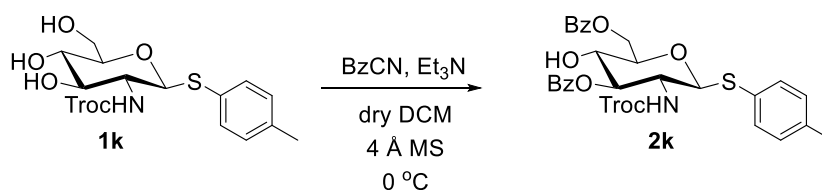

***p*-Tolyl 3,6-di-*O*-benzoyl- 2-deoxy-2-*N*-trichloroacetamido-1-thio- $\beta$ -D-glucopyranoside (**2k**)**

To a solution of compound **1k** (30 mg, 65.1  $\mu$ mol) and 4 Å molecular sieves in 10 mL mixture of DCM was added benzoyl cyanide (17.1 mg, 130  $\mu$ mol) at room temperature under argon atmosphere. After cooling down the reaction mixture to 0 °C, Et<sub>3</sub>N (0.9  $\mu$ L, 6.5  $\mu$ mol) was added. The reaction was further stirred for 6 h at this temperature. After the TLC analysis showed the reaction was complete, the reaction

was quenched by addition of MeOH. Then the mixture was filtered through a pad of Celite and the Celite was further washed with DCM for 3 times. Then the organic layer was concentrated. The residue was purified by column chromatography on silica gel to afford compound **2k** (36.2 mg, 83%) as semisolid.  $^1\text{H}$  NMR (400 MHz,  $\text{CDCl}_3$ )  $\delta$  8.04 – 7.97 (m, 2H, ArH), 7.97 – 7.89 (m, 2H, ArH), 7.60 (t,  $J = 7.3$  Hz, 1H, ArH), 7.52 (t,  $J = 7.4$  Hz, 1H, ArH), 7.48 – 7.37 (m, 5H, ArH), 7.33 (t,  $J = 7.6$  Hz, 2H, ArH), 6.93 (d,  $J = 7.8$  Hz, 2H, ArH), 5.66 (d,  $J = 9.7$  Hz, 1H, NH), 5.47 (t,  $J = 9.5$  Hz, 1H, 3-H), 4.89 (d,  $J = 10.4$  Hz, 1H, 1-H), 4.77 – 4.67 (m, 2H, 6-H<sub>a</sub>, OCH<sub>2</sub>), 4.62 (dd,  $J = 12.1, 5.4$  Hz, 1H, 6-H<sub>b</sub>), 4.55 (d,  $J = 12.0$  Hz, 1H, OCH<sub>2</sub>), 3.96 – 3.88 (m, 1H, 2-H), 3.88 – 3.74 (m, 2H, 5-H, 4-H), 3.61 (d,  $J = 5.4$  Hz, 1H, OH), 2.27 (s, 3H, CH<sub>3</sub>).  $^{13}\text{C}$  NMR (100 MHz,  $\text{CDCl}_3$ )  $\delta$  167.3, 166.9, 154.2, 138.0, 133.6, 133.3, 133.0, 130.0, 129.9, 129.6, 129.5, 128.8, 128.5, 128.40, 128.37, 95.3, 86.8, 77.9, 74.3, 69.4, 63.8, 54.8, 21.2. HRMS (ESI) Calcd for  $\text{C}_{30}\text{H}_{29}\text{Cl}_3\text{NO}_8\text{S}^+$   $[\text{M} + \text{H}]^+$ : 668.0674, found: 668.0677;  $\text{C}_{30}\text{H}_{32}\text{Cl}_3\text{N}_2\text{O}_8\text{S}^+$   $[\text{M} + \text{NH}_4]^+$ : 685.0939, found: 685.0947.

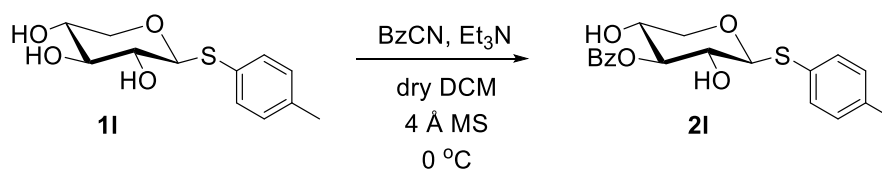

### ***p*-Tolyl 3-*O*-benzoyl-1-thio- $\beta$ -D-xylopyranoside (**2l**)**

To a solution of compound **1l** (30 mg, 117  $\mu\text{mol}$ ) and 4 Å molecular sieves in 11 mL mixture of DCM was added benzoyl cyanide (15.3 mg, 117  $\mu\text{mol}$ ) at room temperature under argon atmosphere. After cooling down the reaction mixture to 0 °C, Et<sub>3</sub>N (1.6  $\mu\text{L}$ , 11.7  $\mu\text{mol}$ ) was added. The reaction was further stirred for 4 h at this temperature. After the TLC analysis showed the reaction was complete, the reaction was quenched by addition of MeOH. Then the mixture was filtered through a pad of Celite and the Celite was further washed with DCM for 3 times. Then the organic layer was concentrated. The residue was purified by column chromatography on silica gel to afford compound **2l** (33.8 mg, 80%) as semisolid.  $^1\text{H}$  NMR (400 MHz,  $\text{CDCl}_3$ )  $\delta$  8.13 – 8.07 (m, 2H, ArH), 7.62 – 7.53 (m, 1H, ArH), 7.49 – 7.41 (m, 4H, ArH), 7.17 – 7.11 (m, 2H, ArH), 5.14 (t,  $J = 7.4$  Hz, 1H, 3-H), 4.79 (d,  $J = 7.2$  Hz, 1H, 1-H), 4.32

(dd,  $J = 11.9, 4.4$  Hz, 1H, 5-H), 3.93 – 3.83 (m, 1H, 4-H), 3.79 – 3.70 (m, 1H, 2-H), 3.50 (dd,  $J = 11.9, 8.0$  Hz, 1H, 5'-H), 3.10 – 3.08 (m, 2H, 2-OH, 4-OH), 2.35 (s, 3H,  $CH_3$ ).  $^{13}C$  NMR (100 MHz,  $CDCl_3$ )  $\delta$  167.2, 138.4, 133.6, 133.1, 130.0, 129.9, 129.1, 128.6, 128.5, 128.5, 89.2, 70.0, 68.2, 67.3, 21.16. HRMS (ESI) Calcd for  $C_{19}H_{21}O_5S^+$   $[M + H]^+$ : 361.1104, found: 361.1107;  $C_{19}H_{24}NO_5S^+$   $[M + NH_4]^+$ : 378.1370, found: 378.1372.

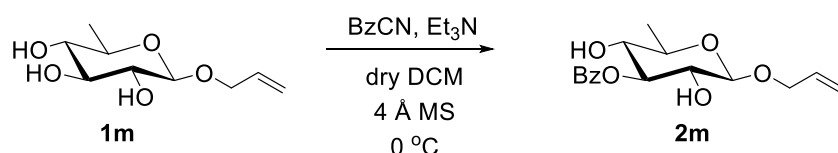

### Allyl 3-*O*-benzoyl- $\beta$ -D- quinovopyranoside (**2m**)

To a solution of compound **1m** (36 mg, 176  $\mu$ mol) and 4 Å molecular sieves in 14 mL mixture of DCM was added benzoyl cyanide (23.1 mg, 176  $\mu$ mol) at room temperature under argon atmosphere. After cooling down the reaction mixture to 0 °C,  $Et_3N$  (2.5  $\mu$ L, 17.6  $\mu$ mol) was added. The reaction was further stirred for 6 h at this temperature. After the TLC analysis showed the reaction was complete, the reaction was quenched by addition of MeOH. Then the mixture was filtered through a pad of Celite and the Celite was further washed with DCM for 3 times. Then the organic layer was concentrated. The residue was purified by column chromatography on silica gel to afford compound **2m** (46.2 mg, 85%) as semisolid.  $^1H$  NMR (400 MHz,  $CDCl_3$ )  $\delta$  8.07 (d,  $J = 7.7$  Hz, 2H, *ArH*), 7.58 (t,  $J = 7.4$  Hz, 1H, *ArH*), 7.44 (t,  $J = 7.6$  Hz, 2H, *ArH*), 5.94 (m, 1H, vinylic  $CH=CH_2$ ), 5.33 (m, 1H, vinylic  $CH=CH_2$ ), 5.22 (d,  $J = 10.4$  Hz, 1H, vinylic  $CH=CH_2$ ), 5.10 (t,  $J = 8.7$  Hz, 1H, 3-H), 4.40 (m, 2H, 1-H, allylic  $OCH_2$ ), 4.14 (dd,  $J = 12.7, 6.4$  Hz, 1H, allylic  $OCH_2$ ), 3.68 (t,  $J = 8.6$  Hz, 1H, 4-H), 3.50 – 3.39 (m, 2H, 2-H, 5-H), 1.37 (d,  $J = 4.8$  Hz, 3H, 6- $CH_3$ ).  $^{13}C$  NMR (100 MHz,  $CDCl_3$ )  $\delta$  168.0, 133.6, 133.5, 130.0, 129.4, 128.5, 118.1, 101.5, 79.0, 74.6, 72.5, 72.3, 70.4, 17.6. HRMS (ESI) Calcd for  $C_{16}H_{21}O_6^+$   $[M + H]^+$ : 309.1333, found: 309.1332;  $C_{16}H_{20}NaO_6^+$   $[M + Na]^+$ : 331.1152, found: 331.1149.

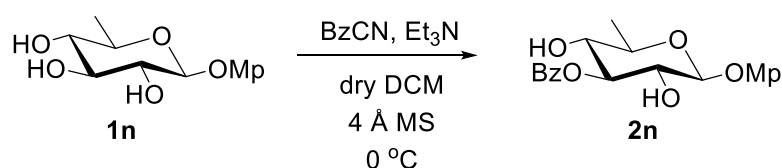

#### 4-Methoxyphenyl 3-*O*-benzoyl- $\beta$ -D-quinovopyranoside (**2n**)

To a solution of compound **1n** (30 mg, 111  $\mu$ mol) and 4 Å molecular sieves in 10.6 mL mixture of DCM was added benzoyl cyanide (14.6 mg, 111  $\mu$ mol) at room temperature under argon atmosphere. After cooling down the reaction mixture to 0 °C, Et<sub>3</sub>N (1.5  $\mu$ L, 11.1  $\mu$ mol) was added. The reaction was further stirred for 12 h at this temperature. After the TLC analysis showed the reaction was complete, the reaction was quenched by addition of MeOH. Then the mixture was filtered through a pad of Celite and the Celite was further washed with DCM for 3 times. Then the organic layer was concentrated. The residue was purified by column chromatography on silica gel to afford compound **2m** (34.9 mg, 85%) as semisolid. <sup>1</sup>H NMR (400 MHz, CDCl<sub>3</sub>)  $\delta$  8.02 – 7.96 (m, 2H, ArH), 7.54 – 7.47 (m, 1H, ArH), 7.36 (t, *J* = 7.7 Hz, 2H, ArH), 6.96 – 6.88 (m, 2H, ArH), 6.77 – 6.71 (m, 2H, ArH), 5.11 (t, *J* = 8.9 Hz, 1H, 3-H), 4.78 (d, *J* = 7.8 Hz, 1H, 1-H), 3.82 (ddd, *J* = 9.7, 7.8, 2.5 Hz, 1H, 2-H), 3.69 (s, 3H, OCH<sub>3</sub>), 3.53 – 3.36 (m, 2H, 4-H, 5-H), 2.93 (d, *J* = 4.6 Hz, 1H, 4-OH), 2.82 (d, *J* = 3.3 Hz, 1H, 2-OH), 1.30 (d, *J* = 5.4 Hz, 3H, 6-CH<sub>3</sub>). <sup>13</sup>C NMR (100 MHz, CDCl<sub>3</sub>)  $\delta$  168.0, 155.5, 151.1, 133.6, 130.0, 129.3, 128.5, 118.5, 114.6, 101.9, 78.9, 74.4, 72.4, 72.3, 55.6, 29.7, 17.6. HRMS (ESI) Calcd for C<sub>16</sub>H<sub>21</sub>O<sub>6</sub><sup>+</sup> [M + H]<sup>+</sup>: 309.1333, found: 309.1332; C<sub>20</sub>H<sub>22</sub>NaO<sub>7</sub><sup>+</sup> [M + Na]<sup>+</sup>: 397.1258, found: 397.1264.

#### (2) Procedures for PPY catalyzed cyanide-mediated 3,4,6-tri-*O*-benzoylation of fully unprotected $\beta$ -glucopyranosides.

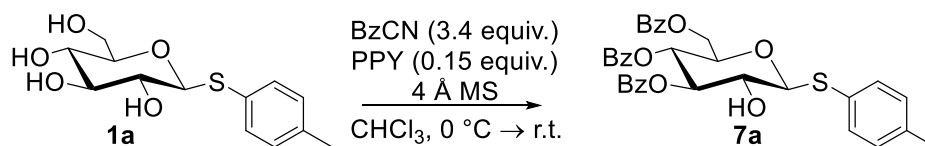

#### *p*-Tolyl 3,4,6-tri-*O*-benzoyl-1-thio- $\beta$ -D-glucopyranoside (**7a**)

To a solution of compound **1c** (30 mg, 105  $\mu$ mol) and 4 Å molecular sieves in 1.5 mL mixture of CHCl<sub>3</sub> was added benzoyl cyanide (46.7 mg, 356  $\mu$ mol) at room temperature under argon atmosphere. The reaction was cooled to 0 °C and PPY (2.3 mg, 15.7  $\mu$ mol) was added. The reaction was further stirred and allowed to gradually warm to room temperature over 12 h. The reaction was quenched by addition of NH<sub>4</sub>Cl (s) and MeOH. Then the mixture was filtered through a pad of Celite and the

Celite was further washed with DCM for 3 times. Then the organic layer was concentrated. The residue was purified by column chromatography on silica gel to afford compound **7a** (39.6 mg, 63%) as semisolid. <sup>1</sup>H NMR (400 MHz, CDCl<sub>3</sub>) δ 7.95 (d, *J* = 7.8 Hz, 2H, *ArH*), 7.86 – 7.78 (m, 4H, *ArH*), 7.49 (t, *J* = 7.4 Hz, 1H, *ArH*), 7.40 – 7.32 (m, 6H, *ArH*), 7.26 – 7.22 (m, 4H, *ArH*), 6.88 (d, *J* = 7.7 Hz, 2H, *ArH*), 5.53 (t, *J* = 9.3 Hz, 1H, 3-H), 5.42 (t, *J* = 9.7 Hz, 1H, 4-H), 4.63 (d, *J* = 9.6 Hz, 1H, 1-H), 4.56 (dd, *J* = 12.3, 2.8 Hz, 1H, 6-H<sub>a</sub>), 4.35 (dd, *J* = 12.2, 5.5 Hz, 1H, 6-H<sub>b</sub>), 4.02 – 3.97 (m, 1H, 5-H), 3.62 (t, *J* = 9.4 Hz, 1H, 2-H), 2.56 (br, 1H, *OH*), 2.21 (s, 3H, *CH*<sub>3</sub>). <sup>13</sup>C NMR (100 MHz, CDCl<sub>3</sub>) δ 166.6, 166.1, 165.4, 138.9, 134.1, 133.9, 133.5, 133.4, 133.1, 129.91, 129.86, 129.83, 129.7, 129.6, 129.1, 128.8, 128.52, 128.45, 128.39, 128.37, 126.7, 88.3, 76.5, 76.2, 70.7, 70.0, 69.0, 63.1, 21.2. HRMS (ESI) Calcd for C<sub>34</sub>H<sub>31</sub>O<sub>8</sub>S<sup>+</sup> [M + H]<sup>+</sup>: 599.1734, found: 599.1739; C<sub>34</sub>H<sub>34</sub>NO<sub>8</sub>S<sup>+</sup> [M + NH<sub>4</sub>]<sup>+</sup>: 616.2000, found: 616.2003; C<sub>34</sub>H<sub>30</sub>NaO<sub>8</sub>S<sup>+</sup> [M + Na]<sup>+</sup>: 621.1554, found: 621.1547.

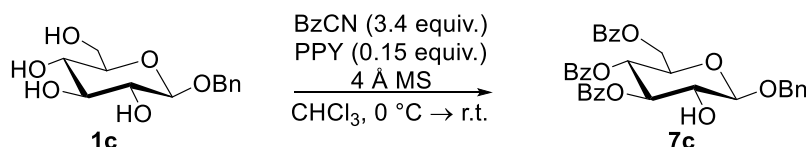

### Benzyl 3,4,6-tri-*O*-benzoyl-β-D-glucopyranoside (**7c**)

To a solution of compound **1c** (30 mg, 111 μmol) and 4 Å molecular sieves in 1.6 mL mixture of CHCl<sub>3</sub> was added benzoyl cyanide (49.5 mg, 377 μmol) at room temperature under argon atmosphere. The reaction was cooled to 0 °C and PPY (2.5 mg, 16.6 μmol) was added. The reaction was further stirred and allowed to gradually warm to room temperature over 5 h. The reaction was quenched by addition of NH<sub>4</sub>Cl (s) and MeOH. Then the mixture was filtered through a pad of Celite and the Celite was further washed with DCM for 3 times. Then the organic layer was concentrated. The residue was purified by column chromatography on silica gel to afford compound **7a** (40.9 mg, 63%) as semisolid. <sup>1</sup>H NMR (400 MHz, CDCl<sub>3</sub>) δ 8.06 – 8.00 (m, 2H, *ArH*), 7.99 – 7.93 (m, 3H, *ArH*), 7.92 – 7.87 (m, 2H, *ArH*), 7.58 – 7.45 (m, 4H, *ArH*), 7.43 – 7.29 (m, 11H, *ArH*), 5.63 – 5.53 (m, 2H, 3-H, 4-H), 4.96 (d, *J* = 11.7 Hz, 1H, *PhCH*<sub>2</sub>), 4.71 (d, *J* = 11.6 Hz, 1H, *PhCH*<sub>2</sub>), 4.65 – 4.58 (m, 2H, 1-H, 6-H<sub>a</sub>), 4.49 (dd, *J*

= 12.1, 5.6 Hz, 1H, 6-H<sub>b</sub>), 4.04 (td,  $J = 5.8, 2.8$  Hz, 1H, 5-H), 3.88 (td,  $J = 7.2, 3.7$  Hz, 1H, 2-H), 2.63 (d,  $J = 3.0$  Hz, 1H, 2-OH). <sup>13</sup>C NMR (100 MHz, CDCl<sub>3</sub>)  $\delta$  166.5, 166.2, 165.4, 136.4, 133.5, 133.3, 133.2, 129.94, 129.91, 129.82, 129.74, 129.68, 129.2, 129.0, 128.8, 128.6, 128.43, 128.39, 128.37, 128.27, 101.4, 75.0, 72.8, 72.2, 71.2, 69.6, 63.4. HRMS (ESI) Calcd for C<sub>34</sub>H<sub>31</sub>O<sub>9</sub><sup>+</sup> [M + H]<sup>+</sup>: 583.1963, found: 583.1968; C<sub>34</sub>H<sub>34</sub>NO<sub>9</sub><sup>+</sup> [M + NH<sub>4</sub>]<sup>+</sup>: 600.2228, found: 600.2232.

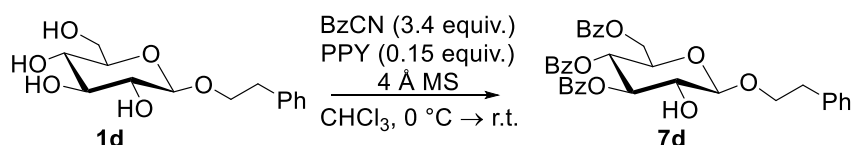

### 2-Phenylethyl 3,4,6-tri-*O*-benzoyl- $\beta$ -D-glucopyranoside (**7d**)

To a solution of compound **1d** (30 mg, 106  $\mu$ mol) and 4 Å molecular sieves in 1.5 mL mixture of CHCl<sub>3</sub> was added benzoyl cyanide (47.0 mg, 359  $\mu$ mol) at room temperature under argon atmosphere. The reaction was cooled to 0 °C and PPY (2.3 mg, 15.8  $\mu$ mol) was added. The reaction was further stirred and allowed to gradually warm to room temperature over 5 h. The reaction was quenched by addition of NH<sub>4</sub>Cl (s) and MeOH. Then the mixture was filtered through a pad of Celite and the Celite was further washed with DCM for 3 times. Then the organic layer was concentrated. The residue was purified by column chromatography on silica gel to afford compound **7d** (38.5 mg, 61%) as semisolid. <sup>1</sup>H NMR (400 MHz, CDCl<sub>3</sub>)  $\delta$  7.93 – 7.87 (m, 4H, ArH), 7.85 – 7.79 (m, 2H, ArH), 7.48 – 7.37 (m, 3H, ArH), 7.33 – 7.16 (m, 8H, ArH), 7.13 (dt,  $J = 9.2, 3.1$  Hz, 3H, ArH), 5.56 – 5.44 (m, 2H, 3-H, 4-H), 4.56 – 4.46 (m, 2H, 1-H, 6-H<sub>a</sub>), 4.39 (dd,  $J = 12.1, 5.6$  Hz, 1H, 6-H<sub>b</sub>), 4.17 – 4.07 (m, 1H, OCH<sub>2</sub>), 3.97 (ddd,  $J = 9.1, 5.7, 3.1$  Hz, 1H), 3.78 – 3.71 (m, 2H, 2-H, OCH<sub>2</sub>), 2.94 – 2.88 (m, 2H, PhCH<sub>2</sub>), 2.37 (d,  $J = 2.6$  Hz, 1H, 2-OH). <sup>13</sup>C NMR (100 MHz, CDCl<sub>3</sub>)  $\delta$  166.4, 166.1, 165.4, 138.2, 133.4, 133.31, 133.25, 133.1, 130.0, 129.9, 129.8, 129.7, 129.6, 129.2, 128.84, 128.82, 128.76, 128.5, 128.4, 128.3, 128.2, 126.5, 103.1, 74.9, 74.5, 72.7, 72.2, 71.1, 69.7, 69.5, 63.3, 36.1. HRMS (ESI) Calcd for C<sub>35</sub>H<sub>36</sub>NO<sub>9</sub><sup>+</sup> [M + NH<sub>4</sub>]<sup>+</sup>: 614.2385, found: 614.2401; C<sub>35</sub>H<sub>32</sub>NaO<sub>9</sub><sup>+</sup> [M + Na]<sup>+</sup>: 619.1939; found: 619.1953.

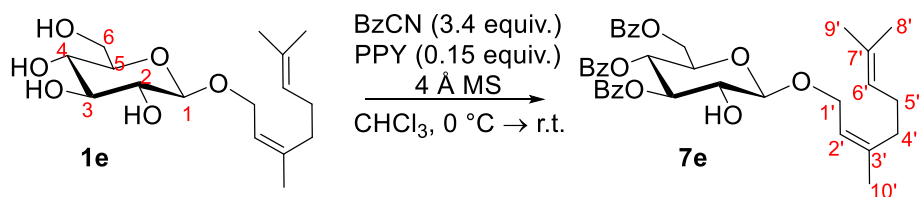

**(2Z)-3,7-dimethyl-2,6-octadien-1-yl 3,6-di-O-benzoyl-β-D-glucopyranoside (7e)**

To a solution of compound **1e** (30 mg, 94.8 μmol) and 4 Å molecular sieves in 1.35 mL mixture of CHCl<sub>3</sub> was added benzoyl cyanide (42.3 mg, 322 μmol) at room temperature under argon atmosphere. After cooling down the reaction mixture to 0 °C, PPY (2.1 mg, 14.2 μmol) was added. The reaction was further stirred and allowed to gradually warm to room temperature over 6.5 h. The reaction was quenched by addition of NH<sub>4</sub>Cl (s) and MeOH. Then the mixture was filtered through a pad of Celite and the Celite was further washed with DCM for 3 times. Then the organic layer was concentrated. The residue was purified by column chromatography on silica gel to afford compound **7e** (37.2 mg, 62%) as semisolid. <sup>1</sup>H NMR (400 MHz, CDCl<sub>3</sub>) δ 7.94 – 7.88 (m, 4H, ArH), 7.85 – 7.80 (m, 2H, ArH), 7.49 – 7.37 (m, 3H, ArH), 7.35 – 7.23 (m, 6H, ArH), 5.58 – 5.45 (m, 2H, 3-H, 4-H), 5.32 (t, *J* = 7.2 Hz, 1H, 3'-H), 5.01 – 4.94 (m, 1H), 4.55 – 4.49 (m, 2H, 1-H, 6-H<sub>a</sub>), 4.39 (dd, *J* = 12.1, 5.6 Hz, 1H, 6-H<sub>b</sub>), 4.29 (dd, *J* = 11.9, 6.4 Hz, 1H, 1'-H<sub>a</sub>), 4.20 (dd, *J* = 11.9, 7.9 Hz, 1H, 1'-H<sub>b</sub>), 3.98 (ddd, *J* = 9.0, 5.6, 3.3 Hz, 1H, 5-H), 3.74 (t, *J* = 8.3 Hz, 1H, 2-H), 2.51 (s, 1H, 2-OH), 2.07 – 1.94 (m, 4H, 4'-H, 5'-H), 1.70 (s, 3H, 10'-H), 1.59 (s, 3H, 8'-H), 1.50 (s, 3H, 9'-H). <sup>13</sup>C NMR (100 MHz, CDCl<sub>3</sub>) δ 166.4, 166.2, 165.4, 142.5, 133.4, 133.3, 133.1, 132.2, 129.9, 129.8, 129.71, 129.68, 129.3, 128.9, 128.4, 128.3, 123.5, 120.3, 101.4, 75.0, 72.7, 72.2, 69.6, 65.6, 63.5, 32.1, 26.6, 25.7, 23.6, 17.7. HRMS (ESI) Calcd for C<sub>37</sub>H<sub>44</sub>NO<sub>9</sub><sup>+</sup> [M + NH<sub>4</sub>]<sup>+</sup>: 646.3011, found: 646.3021.

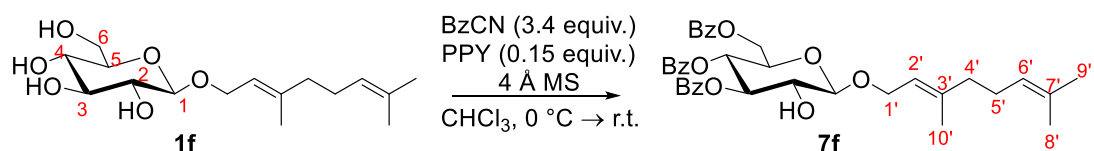

**(2E)-3,7-dimethyl-2,6-octadien-1-yl 3,4,6-di-O-benzoyl-β-D-glucopyranoside (7f)**

To a solution of compound **1f** (30 mg, 94.8 μmol) and 4 Å molecular sieves in 1.35 mL mixture of CHCl<sub>3</sub> was added benzoyl cyanide (42.3 mg, 322 μmol) at room



temperature under argon atmosphere. After cooling down the reaction mixture to 0 °C, PPY (2.1 mg, 14.2 μmol) was added. The reaction was further stirred and allowed to gradually warm to room temperature over 6.5 h. The reaction was quenched by addition of NH<sub>4</sub>Cl (s) and MeOH. Then the mixture was filtered through a pad of Celite and the Celite was further washed with DCM for 3 times. Then the organic layer was concentrated. The residue was purified by column chromatography on silica gel to afford compound **7f** (36.7 mg, 62%) as semisolid. <sup>1</sup>H NMR (400 MHz, CDCl<sub>3</sub>) δ 7.94 – 7.88 (m, 4H, ArH), 7.85 – 7.80 (m, 2H, ArH), 7.48 – 7.38 (m, 3H, ArH), 7.34 – 7.22 (m, 6H, ArH), 5.58 – 5.46 (m, 2H, 3-H, 4-H), 5.33 – 5.27 (m, 1H, 3'-H), 5.06 – 4.98 (m, 1H, 6'-H), 4.57 – 4.50 (m, 2H, 1-H, 6-H<sub>a</sub>), 4.40 (dd, *J* = 12.1, 5.7 Hz, 1H, 6-H<sub>b</sub>), 4.30 (dd, *J* = 11.9, 6.3 Hz, 1H, 1-H), 4.23 (dd, *J* = 11.8, 8.0 Hz, 1H, 1'-H), 3.97 (ddd, *J* = 9.2, 5.8, 3.2 Hz, 1H, 5-H), 3.80 – 3.71 (m, 1H, 2-H), 2.52 (d, *J* = 2.8 Hz, 1H, 2-OH), 2.07 – 1.96 (m, 4H, 4'-H, 5'-H), 1.63 (s, 3H, 8'-H), 1.58 (s, 3H, 10'-H), 1.53 (s, 3H, 9'-H). <sup>13</sup>C NMR (100 MHz, CDCl<sub>3</sub>) δ 166.4, 166.1, 165.4, 142.6, 133.4, 133.2, 133.1, 131.9, 129.9, 129.8, 129.69, 129.65, 129.2, 128.9, 128.38, 128.32, 128.29, 123.8, 119.1, 101.0, 75.0, 72.7, 72.2, 69.7, 65.6, 63.5, 39.5, 26.3, 25.7, 17.7, 16.4. HRMS (ESI) Calcd for C<sub>37</sub>H<sub>44</sub>NO<sub>9</sub><sup>+</sup> [M + NH<sub>4</sub>]<sup>+</sup>: 646.3011, found: 646.3025; C<sub>37</sub>H<sub>40</sub>NaO<sub>9</sub><sup>+</sup> [M + Na]<sup>+</sup>: 651.2565; found: 651.2569.

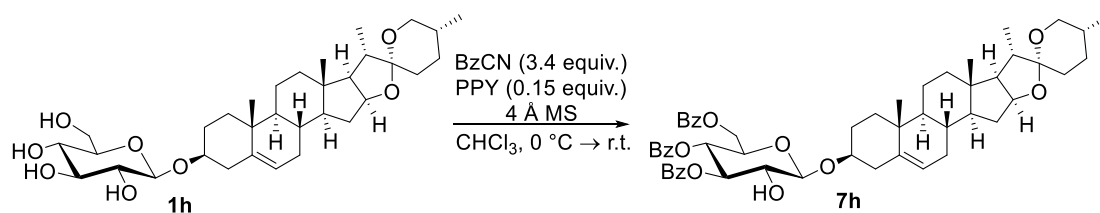

### Diosgenyl 3,4,6-tri-*O*-benzoyl-β-D-glucopyranoside (**7h**)

To a solution of compound **1h** (30 mg, 52.0 μmol) and 4 Å molecular sieves in 0.74 mL mixture of CHCl<sub>3</sub> was added benzoyl cyanide (23.2 mg, 177 μmol) at room temperature under argon atmosphere. After cooling down the reaction mixture to 0 °C, PPY (1.2 mg, 7.8 μmol) was added. The reaction was further stirred and allowed to gradually warm to room temperature over 11 h. The reaction was quenched by addition of NH<sub>4</sub>Cl (s) and MeOH. Then the mixture was filtered through a pad of Celite and the Celite was further washed with DCM for 3 times. Then the organic

layer was concentrated. The residue was purified by column chromatography on silica gel to afford compound **7h** (31.3 mg, 68%) as semisolid. <sup>1</sup>H NMR (400 MHz, CDCl<sub>3</sub>) δ 8.01 – 7.95 (m, 4H, ArH), 7.92 – 7.87 (m, 2H, ArH), 7.56 – 7.46 (m, 3H, ArH), 7.40 – 7.31 (m, 7H, ArH), 5.62 (t, *J* = 9.5 Hz, 1H, 3-H), 5.53 (t, *J* = 9.6 Hz, 1H, 4-H), 5.35 (d, *J* = 5.1 Hz, 1H, vinylic CH=CH<sub>2</sub>), 4.66 (d, *J* = 7.7 Hz, 1H, 1-H), 4.52 (m, 2H, 6-H<sub>a</sub>, 6-H<sub>b</sub>), 4.42 (q, *J* = 7.4 Hz, 1H), 4.06 (ddd, *J* = 9.7, 6.1, 3.6 Hz, 1H, 5-H), 3.79 (ddd, *J* = 9.8, 7.7, 2.7 Hz, 1H, 2-H), 3.60 (tt, *J* = 10.8, 4.7 Hz, 1H), 3.48 (dt, *J* = 10.6, 3.0 Hz, 1H), 3.38 (t, *J* = 10.9 Hz, 1H), 2.59 (d, *J* = 2.7 Hz, 1H, 2-OH), 2.40 (ddd, *J* = 13.0, 5.1, 2.1 Hz, 1H), 2.35 – 2.25 (m, 1H), 2.06 – 1.91 (m, 3H), 1.91 – 1.84 (m, 1H), 1.83 – 1.70 (m, 3H), 1.70 – 1.55 (m, 9H), 1.47 (m, 3H), 1.36 – 1.05 (m, 4H), 0.99 (m, 5H), 0.97 – 0.95 (m, 2H), 0.94 – 0.85 (m, 1H), 0.79 (m, 6H). <sup>13</sup>C NMR (100 MHz, CDCl<sub>3</sub>) δ 166.4, 166.1, 165.4, 140.2, 133.4, 133.3, 133.0, 129.9, 129.8, 129.7, 129.3, 128.9, 128.42, 128.36, 128.32, 122.0, 109.3, 101.7, 80.8, 80.1, 75.0, 72.7, 72.1, 69.8, 66.9, 63.5, 62.1, 56.5, 50.1, 41.6, 40.3, 39.8, 38.9, 37.1, 36.8, 32.1, 31.9, 31.4, 30.3, 29.7, 28.8, 20.8, 19.4, 17.2, 16.3, 14.5. HRMS (ESI) Calcd for C<sub>54</sub>H<sub>65</sub>O<sub>11</sub><sup>+</sup> [M + H]<sup>+</sup>: 889.4521, found: 889.4530; C<sub>54</sub>H<sub>68</sub>NO<sub>11</sub><sup>+</sup> [M + NH<sub>4</sub>]<sup>+</sup>: 906.4787, found: 906.4795.

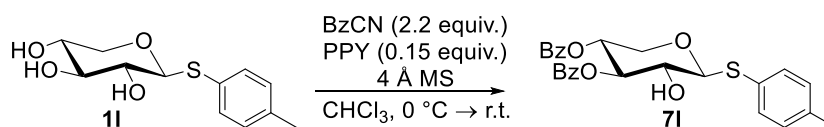

### ***p*-Tolyl 3,4-di-*O*-benzoyl-1-thio-β-*D*-xylopyranoside (7l)**

To a solution of compound **11** (30 mg, 117 μmol) and 4 Å molecular sieves in 1.7 mL mixture of CHCl<sub>3</sub> was added benzoyl cyanide (33.8 mg, 257 μmol) at room temperature under argon atmosphere. After cooling down the reaction mixture to 0 °C, PPY (2.6 mg, 17.6 μmol) was added. The reaction was further stirred and allowed to gradually warm to room temperature over 1.5 h. The reaction was quenched by addition of NH<sub>4</sub>Cl (s) and MeOH. Then the mixture was filtered through a pad of Celite and the Celite was further washed with DCM for 3 times. Then the organic layer was concentrated. The residue was purified by column chromatography on silica gel to afford compound **7l** (36 mg, 67%) as semisolid. <sup>1</sup>H NMR (400 MHz, CDCl<sub>3</sub>) δ 8.06 – 8.00 (m, 2H, ArH), 7.96 – 7.92 (m, 2H, ArH), 7.57 – 7.46 (m, 4H, ArH), 7.41

– 7.36 (m, 4H, *ArH*), 7.17 (d,  $J = 7.9$  Hz, 2H, *ArH*), 5.56 (t,  $J = 8.6$  Hz, 1H, 3-H), 5.27 (td,  $J = 9.0, 5.1$  Hz, 1H, 4-H), 4.71 (d,  $J = 8.4$  Hz, 1H, 1-H), 4.45 (dd,  $J = 11.6, 5.1$  Hz, 1H, 5-H), 3.72 (td,  $J = 8.4, 4.0$  Hz, 1H, 2-H), 3.58 (dd,  $J = 11.6, 9.2$  Hz, 1H, 5'-H), 2.80 (d,  $J = 4.0$  Hz, 1H, 2-OH), 2.37 (s, 3H,  $CH_3$ ).  $^{13}C$  NMR (100 MHz,  $CDCl_3$ )  $\delta$  166.3, 165.5, 138.9, 133.9, 133.5, 133.4, 129.98, 129.95, 129.8, 129.3, 129.0, 128.5, 128.4, 127.3, 89.2, 74.8, 70.4, 69.3, 66.0, 21.2. HRMS (ESI) Calcd for  $C_{26}H_{25}O_6S^+$   $[M + H]^+$ : 465.1366, found: 465.1367;  $C_{26}H_{28}NO_6S^+$   $[M + NH_4]^+$ : 482.1632, found: 482.1631;  $C_{26}H_{24}NaO_6S^+$   $[M + Na]^+$ : 487.1186, found: 487.1180.

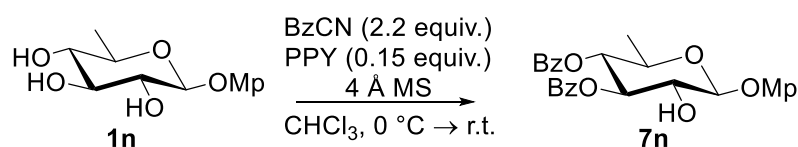

#### 4-Methoxyphenyl 3,4-di-*O*-benzoyl- $\beta$ -D-quinovopyranoside (**7n**)

To a solution of compound **1n** (30 mg, 111  $\mu$ mol) and 4 Å molecular sieves in 0.8 mL mixture of  $CHCl_3$  was added benzoyl cyanide (32.0 mg, 244  $\mu$ mol) at room temperature under argon atmosphere. After cooling down the reaction mixture to 0 °C, PPY (2.5 mg, 16.6  $\mu$ mol) was added. The reaction was further stirred and allowed to gradually warm to room temperature over 6 h. The reaction was quenched by addition of  $NH_4Cl$  (s) and MeOH. Then the mixture was filtered through a pad of Celite and the Celite was further washed with DCM for 3 times. Then the organic layer was concentrated. The residue was purified by column chromatography on silica gel to afford compound **7n** (32.3 mg, 61%) as semisolid.  $^1H$  NMR (400 MHz,  $CDCl_3$ )  $\delta$  7.88 (ddd,  $J = 14.5, 8.3, 1.4$  Hz, 4H), 7.49 – 7.41 (m, 2H, *ArH*), 7.30 (td,  $J = 7.8, 1.4$  Hz, 4H, *ArH*), 7.03 – 6.96 (m, 2H, *ArH*), 6.82 – 6.75 (m, 2H, *ArH*), 5.51 (t,  $J = 9.6$  Hz, 1H, 3-H), 5.26 (t,  $J = 9.6$  Hz, 1H, 4-H), 4.93 (d,  $J = 7.7$  Hz, 1H, 1-H), 3.95 (t,  $J = 8.6$  Hz, 1H, 2-H), 3.79 (dq,  $J = 9.7, 6.2$  Hz, 1H, 5-H), 3.72 (s, 3H,  $OCH_3$ ), 2.75 (s, 1H, 2-OH), 1.29 (d,  $J = 6.1$  Hz, 3H, 6- $CH_3$ ).  $^{13}C$  NMR (100 MHz,  $CDCl_3$ )  $\delta$  166.7, 165.6, 155.7, 151.0, 133.4, 133.3, 129.9, 129.8, 129.2, 129.1, 128.5, 128.4, 118.9, 114.6, 102.3, 75.2, 73.5, 72.9, 70.6, 55.7, 50.9, 29.7, 17.7. HRMS (ESI) Calcd for  $C_{27}H_{26}NaO_8^+$   $[M + Na]^+$ : 501.1520, found: 501.1529.

### (3) Procedures for $Et_3N$ catalyzed cyanide-mediated regioselective benzylation

in synthesis of natural products

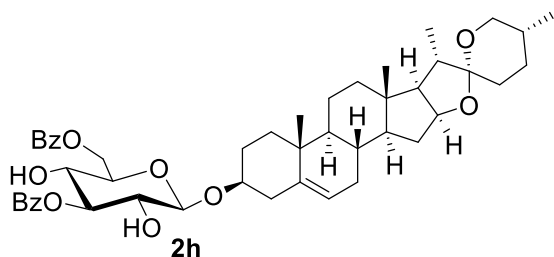

### Diosgenyl 3,6-di-O-benzoyl- $\beta$ -D-glucopyranoside (**2h**)<sup>3</sup>

1 mmol-scale preparation: To a solution of compound **1h** (576 mg, 1 mmol) and 4 Å molecular sieves in anhydrous DCM was added benzoyl cyanide (131 mg, 2 mmol) at room temperature under argon atmosphere. After cooling down the reaction mixture to 0 °C, Et<sub>3</sub>N (13.9  $\mu$ L, 0.1 mmol) was added. The reaction was further stirred for 6 h at this temperature. After the TLC analysis showed the reaction was complete, the reaction was quenched by addition of MeOH. Then the mixture was filtered through a pad of Celite and the Celite was further washed with DCM for 3 times. Then the organic layer was concentrated. The residue was purified by column chromatography on silica gel to afford compound **2h** (589 mg, 75%) as semisolid.

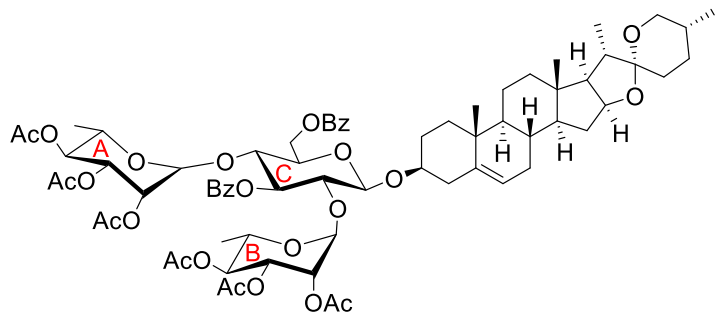

**11**

### Diosgenyl 2,4-di-O-(2,3,4-O-tri-acetyl- $\alpha$ -L-rhamnopyranosyl)-3,6-di-O-benzoyl- $\beta$ -D-glucopyranoside (**11**)

To a solution of glycosyl donor **10** (53 mg, 115  $\mu$ mol), glycosyl acceptor **2h** (30 mg, 38.2  $\mu$ mol) and 4 Å molecular sieves in anhydrous DCM (2 mL) at -20 °C under argon atmosphere was added TMSOTf (4.1  $\mu$ L, 22.9  $\mu$ mol). The reaction was gradually allowed to -10 °C and further stirred at this temperature overnight.

After the TLC analysis showed the reaction was complete, the reaction was quenched

by addition of triethylamine and diluted with 50 mL of DCM. Then the precipitate was filtered off through a pad of Celite. The organic layer was washed with NaHCO<sub>3</sub> (aq.) and brine, dried over Na<sub>2</sub>SO<sub>4</sub>, filtered, and concentrated. The residue was purified by column chromatography on silica gel to afford compound **11** (47 mg, 92%) as semisolid. <sup>1</sup>H NMR (400 MHz, CDCl<sub>3</sub>) δ 8.08 – 8.00 (m, 4H, ArH), 7.62 – 7.53 (m, 2H, ArH), 7.52 – 7.37 (m, 4H, ArH), 5.62 (t, *J* = 9.2 Hz, 1H, 3<sub>C</sub>-H), 5.35 (d, *J* = 5.0 Hz, 1H, vinyl CH), 5.19 – 5.10 (m, 3H, 3<sub>A</sub>-H, 3<sub>B</sub>-H, 2<sub>B</sub>-H), 4.98 (dd, *J* = 3.6, 1.6 Hz, 1H, 2<sub>A</sub>-H), 4.96 – 4.83 (m, 3H, 4<sub>A</sub>-H, 4<sub>B</sub>-H, 1<sub>B</sub>-H), 4.80 (dd, *J* = 12.2, 2.0 Hz, 1H, 6<sub>C</sub>-H), 4.76 (d, *J* = 1.6 Hz, 1H, 1<sub>A</sub>-H), 4.68 (d, *J* = 7.7 Hz, 1H, 1<sub>C</sub>-H), 4.51 (dd, *J* = 12.2, 5.3 Hz, 1H, 6<sub>C</sub>-H'), 4.47 – 4.31 (m, 2H, 5<sub>B</sub>-H), 3.97 (t, *J* = 9.4 Hz, 1H, 4<sub>C</sub>-H), 3.86 (ddd, *J* = 9.7, 5.4, 2.1 Hz, 1H, 5<sub>C</sub>-H), 3.80 (dd, *J* = 9.3, 7.7 Hz, 1H, 2<sub>C</sub>-H), 3.76 – 3.67 (m, 1H, 5<sub>A</sub>-H), 3.57 (tt, *J* = 10.8, 4.6 Hz, 1H), 3.52 – 3.44 (m, 1H), 3.38 (t, *J* = 10.9 Hz, 1H), 2.40 (ddd, *J* = 13.2, 4.9, 2.2 Hz, 1H), 2.29 – 2.15 (m, 1H), 1.99 (s, 6H), 1.95 (s, 3H), 1.92 (s, 3H), 1.89 (s, 3H), 1.84 – 1.38 (m, 14H), 1.37 – 1.04 (m, 11H, 6<sub>B</sub>-CH<sub>3</sub>), 1.03 – 0.75 (m, 14H), 0.68 (d, *J* = 6.1 Hz, 3H, 6<sub>A</sub>-CH<sub>3</sub>). <sup>13</sup>C NMR (100 MHz, CDCl<sub>3</sub>) δ 169.99, 169.94, 169.87, 169.84, 169.6, 168.9, 165.8, 165.0, 140.0, 133.3, 133.0, 130.0, 129.9, 129.8, 129.1, 128.4, 128.3, 122.0, 109.3, 99.4, 99.0, 98.0, 80.8, 79.5, 76.2, 75.9, 73.0, 71.0, 70.5, 70.0, 69.1, 68.7, 68.5, 67.5, 66.8, 66.5, 64.2, 62.8, 62.0, 56.4, 49.9, 41.6, 40.2, 39.7, 38.4, 36.9, 36.7, 32.0, 31.9, 31.8, 31.4, 30.3, 29.7, 29.3, 28.8, 22.7, 20.79, 20.75, 20.70, 20.68, 20.6, 20.3, 19.2, 17.1, 16.8, 16.3, 14.5, 14.1. HRMS (ESI) Calcd for C<sub>71</sub>H<sub>96</sub>NO<sub>24</sub><sup>+</sup> [M + NH<sub>4</sub>]<sup>+</sup>: 1346.6317, found 1346.6372.

#### Diosgenyl 2,4-di-*O*- $\alpha$ -L-rhamnopyranosyl- $\beta$ -D-glucopyranoside (**12**)<sup>4-5</sup>

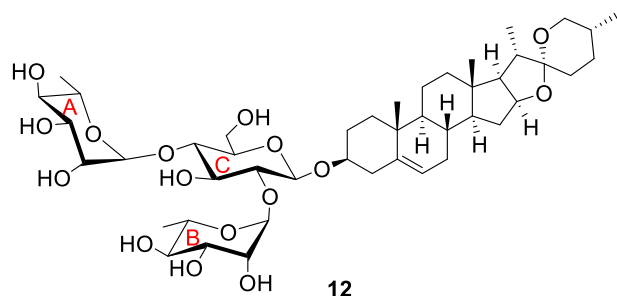

To a solution of compound **11** (164 mg, 123  $\mu$ mol) in DCM/MeOH (1/1, v/v) was added MeONa in MeOH dropwise until pH 10 was reached. The reaction was

monitored by TLC until completion and purified by column chromatography on silica gel to afford compound **12** (80 mg, 76%) as semisolid.  $^1\text{H}$  NMR (400 MHz, Methanol- $d_4$ )  $\delta$  5.41 (m, 1H, vinylic  $\text{CH}$ ), 5.23 (s, 1H, 1-H), 4.88 – 4.86 (1H, 1-H, masked by water), 4.61 (s, 1H), 4.52 (d,  $J = 7.8$  Hz, 1H, 1- $\text{H}_\text{C}$ ), 4.42 (d,  $J = 7.2$  Hz, 1H), 4.20 – 4.10 (m, 1H), 3.97 – 3.94 (m, 2H), 3.88 – 3.78 (m, 2H), 3.71 – 3.50 (m, 10H), 3.45 – 3.38 (m, 7H), 2.49 – 2.45 (m, 2H), 2.34 – 2.28 (m, 1H), 2.08 – 1.87 (m, 5H), 1.83 – 1.40 (m, 16H), 1.37 – 1.11 (m, 13H), 1.07 (s, 3H), 1.05 – 0.87 (m, 5H), 0.88 – 0.77 (m, 7H).

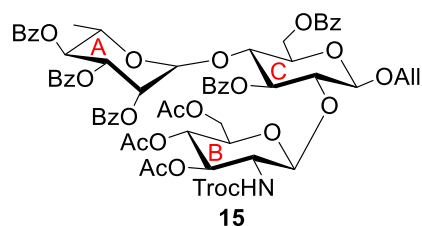

**Allyl 2-*O*-(2-deoxy-2-*N*-trichloroacetamido-2,3,6-tri-*O*-acetyl- $\beta$ -D-glucopyranosyl)-4-*O*-(2,3,4-tri-*O*-benzoyl- $\alpha$ -L-rhamnopyranosyl)-3,6-di-*O*-benzoyl- $\beta$ -D-glucopyranoside (**15**)**

To a solution of glycosyl acceptor **2o** (220 mg, 513  $\mu\text{mol}$ ) and 4 Å molecular sieves in anhydrous DCM (20 mL) at  $-60$  °C under argon atmosphere was added TfOH (5.4  $\mu\text{L}$ , 61.6  $\mu\text{mol}$ ). The reaction stayed under stirring for 10 min, and glycosyl donor **13** (385 mg, 616  $\mu\text{mol}$ ) in 5 mL of anhydrous DCM was added. The reaction was further stirred for 4 h at this temperature.

After the TLC analysis showed the reaction was complete, glycosyl donor **14** (478 mg, 770  $\mu\text{mol}$ ) in 1.5 mL of anhydrous DCM was added, followed by addition of TfOH (6.8  $\mu\text{L}$ , 77.0  $\mu\text{mol}$ ). The reaction was further stirred for another 3 h at this temperature.

After the TLC analysis showed the reaction was complete, the reaction was quenched by addition of triethylamine and diluted with 50 mL of DCM. Then the precipitate was filtered off through a pad of Celite. The organic layer was washed with  $\text{NaHCO}_3$  (aq.) and brine, dried over  $\text{Na}_2\text{SO}_4$ , filtered, and concentrated. The residue was purified by column chromatography on silica gel to afford compound **15** (579 mg, 84%) as semisolid.  $^1\text{H}$  NMR (400 MHz,  $\text{CDCl}_3$ )  $\delta$  8.17 (d,  $J = 7.7$  Hz, 2H, ArH), 8.09 –

8.05 (m, 2H, ArH), 7.94 – 7.86 (m, 4H, ArH), 7.83 – 7.78 (m, 2H, ArH), 7.58 – 7.49 (m, 4H, ArH), 7.48 – 7.35 (m, 9H, ArH), 7.24 (t,  $J = 8.0$  Hz, 2H, ArH), 5.89 (m, 1H, vinylic CH=CH<sub>2</sub>), 5.68 (dd,  $J = 10.2, 3.3$  Hz, 1H, 3<sub>A</sub>-H), 5.60 – 5.49 (m, 3H, 3<sub>C</sub>-H, 2<sub>A</sub>-H, 4<sub>A</sub>-H), 5.35 – 5.26 (m, 2H, vinylic CH=CH<sub>2</sub>, 3<sub>B</sub>-H), 5.23 (d,  $J = 1.8$  Hz, 1H, 1<sub>A</sub>-H), 5.16 (dd,  $J = 10.5, 1.7$  Hz, 1H, vinylic CH=CH<sub>2</sub>), 5.11 – 4.98 (m, 4H, 1<sub>B</sub>-H, 4<sub>B</sub>-H, 6<sub>C</sub>-H, TrocNH), 4.80 (d,  $J = 6.0$  Hz, 1H, 1<sub>C</sub>-H), 4.75 (d,  $J = 12.2$  Hz, 1H, TrocCH<sub>2</sub>CCl<sub>3</sub>), 4.59 (dd,  $J = 12.4, 3.7$  Hz, 1H, 6<sub>C</sub>-H'), 4.50 (d,  $J = 12.2$  Hz, 1H, TrocCH<sub>2</sub>CCl<sub>3</sub>), 4.44 – 4.32 (m, 2H, allylic CH<sub>2</sub>CH=CH<sub>2</sub>, 4<sub>C</sub>-H), 4.23 (dd,  $J = 12.4, 4.1$  Hz, 1H, 6<sub>B</sub>-H), 4.16 – 3.96 (m, 4H, 5<sub>A</sub>-H, 5<sub>C</sub>-H, 6<sub>B</sub>-H', allylic CH<sub>2</sub>CH=CH<sub>2</sub>), 3.92 (t,  $J = 6.4$  Hz, 1H, 2<sub>C</sub>-H), 3.72 – 3.64 (m, 1H, 5<sub>B</sub>-H), 3.48 (dt,  $J = 10.8, 8.4$  Hz, 1H, 2<sub>B</sub>-H), 2.04 (s, 3H, COCH<sub>3</sub>), 1.99 (s, 3H, COCH<sub>3</sub>), 1.96 (s, 3H, COCH<sub>3</sub>), 0.82 (d,  $J = 6.2$  Hz, 3H, 6<sub>A</sub>-CH<sub>3</sub>). <sup>13</sup>C NMR (100 MHz, CDCl<sub>3</sub>)  $\delta$  170.7, 170.4, 169.5, 166.0, 165.7, 165.6, 165.5, 165.4, 153.8, 133.7, 133.6, 133.4, 133.3, 133.1, 133.0, 130.0, 129.9, 129.83, 129.80, 129.77, 129.7, 129.2, 129.1, 128.8, 128.5, 128.40, 128.35, 128.28, 117.0, 100.1, 99.7, 98.7, 95.6, 79.0, 76.5, 75.3, 74.2, 72.5, 71.7, 71.3, 71.2, 69.6, 69.4, 68.5, 67.8, 62.7, 61.9, 56.6, 20.7, 20.61, 20.59, 17.2. HRMS (ESI) Calcd for C<sub>65</sub>H<sub>68</sub>Cl<sub>3</sub>N<sub>2</sub>O<sub>24</sub><sup>+</sup> [M + NH<sub>4</sub>]<sup>+</sup>: 1365.3222, found 1365.3254.

The rhamnosyl- $\alpha$ -(1,4) linkage was established by high resolution coupled HSQC with an anomeric <sup>13</sup>C-<sup>1</sup>H coupling constant  $J_{C-1,H-1} = 172.2$  Hz at 98.74 ppm.

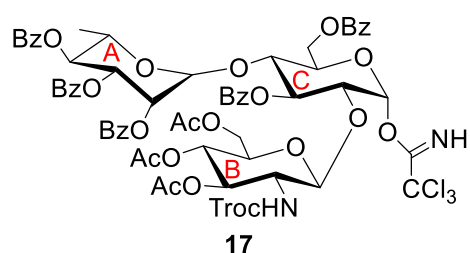

**Trichloroacetimidate 2-O-(2-deoxy-2-N-trichloroacetamido-2,3,6-tri-O-acetyl- $\beta$ -D-glucopyranosyl)-4-O-(2,3,4-tri-O-benzoyl- $\alpha$ -L-rhamnopyranosyl)-3,6-di-O-benzoyl- $\alpha$ -D-glucopyranoside (17)**

To a solution of trisaccharide **15** (220 mg, 163  $\mu$ mol) in 5 mL non anhydrous MeOH was added PdCl<sub>2</sub> (5.8 mg, 32.6  $\mu$ mol). The reaction was stirred at room temperature for 8 h until the TLC analysis showed the formation of a product and consumption of

compound **15**. The reaction was diluted with 50 mL of DCM. Then the precipitate was filtered off through a pad of Celite. The organic layer was concentrated under vacuo and the residue was purified by column chromatography on silica gel to afford compound **16** (195 mg, 91%).

Compound **16** (427 mg, 326  $\mu\text{mol}$ ) was dissolved in anhydrous DCM, and trichloroacetonitrile (163  $\mu\text{L}$ , 1630  $\mu\text{mol}$ ) and DBU (4.9  $\mu\text{L}$ , 68.0  $\mu\text{mol}$ ) were added in sequence at 0 °C. The reaction was further stirred for 5 h min at this temperature. After the TLC analysis showed the reaction was complete, the reaction was concentrated and purified by column chromatography on silica gel to afford compound **17** (400 mg, 84%).

$^1\text{H}$  NMR (400 MHz,  $\text{CDCl}_3$ )  $\delta$  8.63 (s, 1H,  $\text{NHCCl}_3$ ), 8.12 (d,  $J = 7.8$  Hz, 2H, ArH), 8.06 (d,  $J = 7.8$  Hz, 2H, ArH), 7.94 – 7.87 (m, 5H, ArH), 7.81 (d,  $J = 7.8$  Hz, 2H, ArH), 7.58 – 7.52 (m, 5H, ArH), 7.46 – 7.38 (m, 11H, ArH), 7.29 – 7.21 (m, 3H, ArH), 6.64 (d,  $J = 3.7$  Hz, 1H,  $1_{\text{C-H}}$ ), 5.96 (t,  $J = 9.6$  Hz, 1H,  $3_{\text{C-H}}$ ), 5.70 (dd,  $J = 10.2$ , 3.3 Hz, 1H,  $3_{\text{A-H}}$ ), 5.56 – 5.47 (m, 2H,  $2_{\text{A-H}}$ ,  $4_{\text{A-H}}$ ), 5.31 (t,  $J = 10.0$  Hz, 1H,  $3_{\text{B-H}}$ ), 5.22 (s, 1H,  $1_{\text{A-H}}$ ), 5.04 – 4.90 (m, 2H,  $4_{\text{B-H}}$ ,  $6_{\text{C-H}}$ ), 4.86 (d,  $J = 8.2$  Hz, 1H,  $1_{\text{B-H}}$ ), 4.77 (d,  $J = 8.1$  Hz, 1H, TrocNH), 4.64 (dd,  $J = 12.7$ , 3.7 Hz, 1H,  $6_{\text{C-H}}$ '), 4.39 (d,  $J = 10.0$  Hz, 1H,  $5_{\text{C-H}}$ ), 4.35 – 4.21 (m, 2H, Troc $\text{CH}_2\text{CCl}_3$ ,  $4_{\text{C-H}}$ ), 4.18 – 3.97 (m, 4H,  $2_{\text{C-H}}$ ,  $5_{\text{A-H}}$ ,  $6_{\text{B-H}}$  ( $\times 2$ )), 3.87 (d,  $J = 12.2$  Hz, 1H, Troc $\text{CH}_2\text{CCl}_3$ ), 3.68 (d,  $J = 9.7$  Hz, 1H,  $5_{\text{B-H}}$ ), 3.35 (q,  $J = 9.0$  Hz, 1H,  $2_{\text{B-H}}$ ), 2.06 (s, 3H,  $\text{COCH}_3$ ), 1.97 (s, 3H,  $\text{COCH}_3$ ), 1.91 (s, 3H,  $\text{COCH}_3$ ), 0.73 (d,  $J = 6.1$  Hz, 3H,  $6_{\text{A-CH}_3}$ ).  $^{13}\text{C}$  NMR (101 MHz,  $\text{CDCl}_3$ )  $\delta$  170.8, 170.2, 169.5, 165.8, 165.7, 165.52, 165.47, 165.2, 160.7, 153.3, 133.5, 133.44, 133.37, 133.2, 133.0, 130.0, 129.9, 129.84, 129.80, 129.77, 129.70, 129.3, 129.1, 128.7, 128.5, 128.4, 128.33, 128.30, 100.8, 99.2, 95.4, 94.5, 91.0, 78.0, 73.6, 72.3, 71.6, 71.3, 71.2, 71.1, 70.8, 69.4, 68.7, 67.9, 62.2, 56.4, 20.8, 20.6, 20.5, 17.0. HRMS (ESI) Calcd for  $\text{C}_{64}\text{H}_{60}\text{Cl}_6\text{N}_2\text{NaO}_{24}^+ [\text{M} + \text{Na}]^+$ : 1475.1530, found 1475.1541.



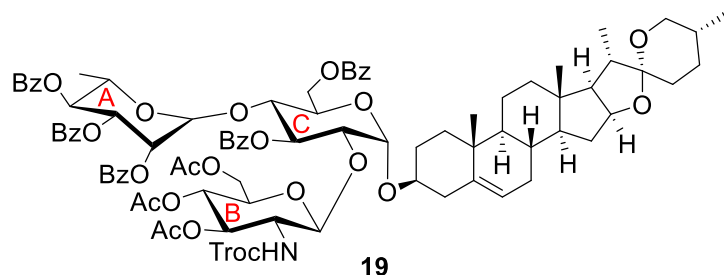

**Diosgenyl 2-*O*-(2-deoxy-2-*N*-trichloroacetamido-2,3,6-tri-*O*-acetyl- $\beta$ -D-glucopyranosyl)-4-*O*-(2,3,4-tri-*O*-benzoyl- $\alpha$ -L-rhamnopyranosyl)-3,6-di-*O*-benzoyl- $\alpha$ -D-glucopyranoside (**19**)**

To a solution of glycosyl donor **17** (20.8 mg, 14.3  $\mu$ mol), glycosyl acceptor **18** (7 mg, 16.9  $\mu$ mol) and 4 Å molecular sieves in anhydrous DCM (10 mL) at -78 °C under argon atmosphere was added TMSOTf (0.3  $\mu$ L, 1.4  $\mu$ mol). The reaction was further stirred for 5 h at this temperature.

After the TLC analysis showed the reaction was complete, the reaction was quenched by addition of triethylamine and diluted with 50 mL of DCM. Then the precipitate was filtered off through a pad of Celite. The organic layer was washed with NaHCO<sub>3</sub> (aq.) and brine, dried over Na<sub>2</sub>SO<sub>4</sub>, filtered, and concentrated. The residue was purified by column chromatography on silica gel to afford compound **19** (22 mg, 90%) as semisolid. <sup>1</sup>H NMR (400 MHz, CDCl<sub>3</sub>)  $\delta$  8.10 – 8.07 (m, 4H, ArH), 7.95 – 7.89 (m, 4H, ArH), 7.82 (d, *J* = 7.7 Hz, 2H, ArH), 7.57 – 7.50 (m, 4H, ArH), 7.43 – 7.38 (m, 9H, ArH), 7.27 – 7.23 (m, 2H, ArH), 5.85 (t, *J* = 9.5 Hz, 1H, 3<sub>C</sub>-H), 5.72 (dd, *J* = 10.2, 3.2 Hz, 1H, 3<sub>A</sub>-H), 5.56 – 5.52 (m, 1H, 2<sub>A</sub>-H), 5.49 (d, *J* = 10.0 Hz, 1H, 4<sub>A</sub>-H), 5.39 – 5.29 (m, 2H, 3<sub>B</sub>-H), 5.23 (d, *J* = 3.6 Hz, 1H, 1<sub>C</sub>-H), 5.19 (s, 1H, 1<sub>A</sub>-H), 4.99 – 4.94 (m, 2H, 4<sub>B</sub>-H, 6<sub>C</sub>-H), 4.83 (d, *J* = 8.2 Hz, 1H, 1<sub>B</sub>-H), 4.76 (d, *J* = 8.1 Hz, 1H, TrocNH), 4.65 (dd, *J* = 12.4, 4.6 Hz, 1H, 6<sub>C</sub>-H'), 4.48 – 4.38 (m, 2H, 5<sub>C</sub>-H), 4.29 (d, *J* = 12.4 Hz, 1H, TrocCH<sub>2</sub>CCl<sub>3</sub>), 4.22 (dd, *J* = 12.3, 4.9 Hz, 1H, 6<sub>B</sub>-H), 4.10 – 3.94 (m, 3H, 5<sub>A</sub>-H, 4<sub>C</sub>-H, 6<sub>B</sub>-H'), 3.82 – 3.74 (m, 2H, 2<sub>C</sub>-H, TrocCH<sub>2</sub>CCl<sub>3</sub>), 3.66 (m, 1H, 5<sub>B</sub>-H), 3.55 – 3.47 (m, 2H), 3.42 – 3.37 (m, 2H, 2<sub>B</sub>-H), 2.59 – 2.37 (m, 2H), 2.05 – 1.98 (m, 8H), 1.92 (s, 4H), 1.85 – 1.73 (m, 1H), 1.73 – 1.56 (m, 7H), 1.56 – 1.40 (m, 3H), 1.37 – 1.18 (m, 8H), 1.09 (s, 3H), 0.99 – 0.85 (m, 4H), 0.84 – 0.77 (m, 6H), 0.72 (d, *J* = 6.1 Hz, 3H, 6<sub>A</sub>-CH<sub>3</sub>). <sup>13</sup>C NMR (101 MHz, CDCl<sub>3</sub>)  $\delta$  170.5, 170.1, 169.6, 166.1, 165.7, 165.58, 165.52, 165.3,

153.3, 140.6, 133.4, 133.3, 133.1, 132.9, 130.1, 129.9, 129.8, 129.7, 129.2, 129.1, 128.6, 128.5, 128.40, 128.35, 128.3, 121.7, 109.3, 101.1, 99.0, 96.6, 95.4, 80.9, 79.2, 78.8, 78.2, 73.6, 72.5, 71.6, 71.4, 71.3, 70.9, 69.5, 68.8, 68.6, 67.8, 66.9, 62.9, 62.1, 62.0, 56.6, 50.1, 41.6, 40.3, 40.1, 39.8, 37.1, 36.9, 32.2, 31.9, 31.5, 31.4, 30.3, 29.7, 29.3, 28.8, 27.6, 27.2, 22.7, 21.1, 20.9, 20.7, 20.6, 20.5, 19.5, 17.2, 17.0, 16.3, 14.6, 14.1. HRMS (ESI) Calcd for C<sub>89</sub>H<sub>100</sub>Cl<sub>3</sub>NNaO<sub>26</sub><sup>+</sup> [M + Na]<sup>+</sup>: 1726.5491, found 1726.5574.

## References

1. Chen, P.; Wang, P.; Song, N.; Li, M., *Steroids* **2013**, *78*, 959-966.
2. Song, G.; Yang, S.; Zhang, W.; Cao, Y.; Wang, P.; Ding, N.; Zhang, Z.; Guo, Y.; Li, Y., *J. Med. Chem.* **2009**, *52*, 7368-7371.
3. Du, Y.; Gu, G.; Wei, G.; Hua, Y.; Linhardt, R. J., *Org. Lett.* **2003**, *5*, 3627-3630.
4. Yu, B.; Tao, H., *Tetrahedron Lett.* **2001**, *42*, 2405-2407.
5. Nakano, K.; Murakami, K.; Takaishi, Y.; Tomimatsu, T.; Nohara, T., *Chem. Pharm. Bull.* **1989**, *37*, 116-118.

# Copies of NMR Spectra

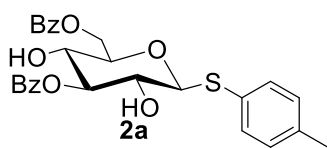

## <sup>1</sup>H NMR (CDCl<sub>3</sub>, 400 MHz) of **2a**

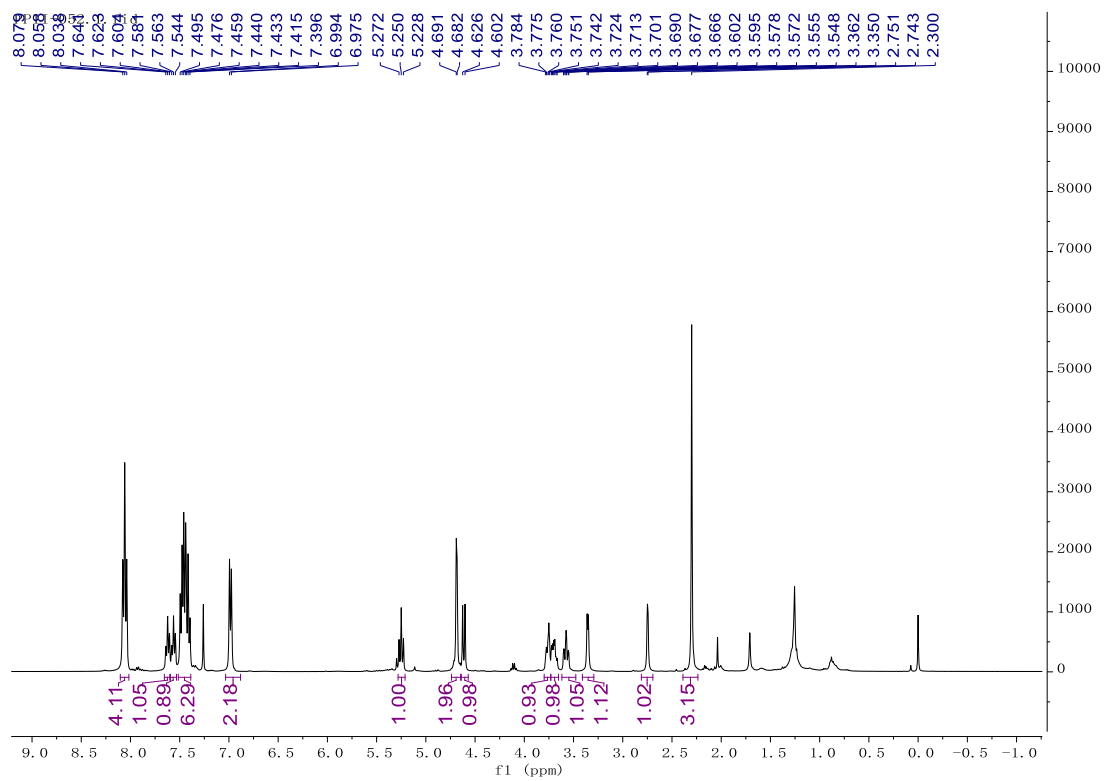

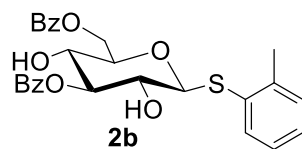

<sup>1</sup>H NMR (CDCl<sub>3</sub>, 400 MHz) of **2b**

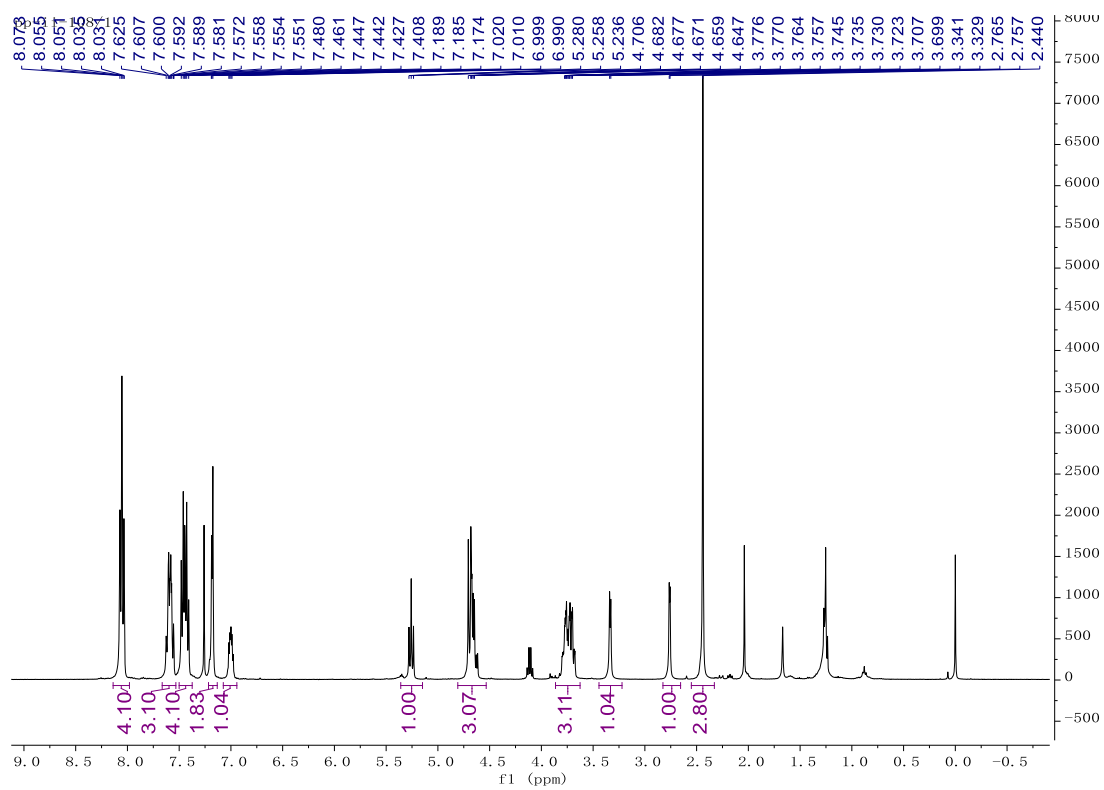

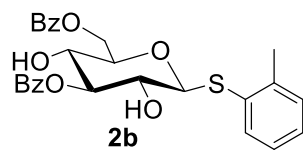

gCOSY (CDCl<sub>3</sub>, 400 MHz) of **2b**

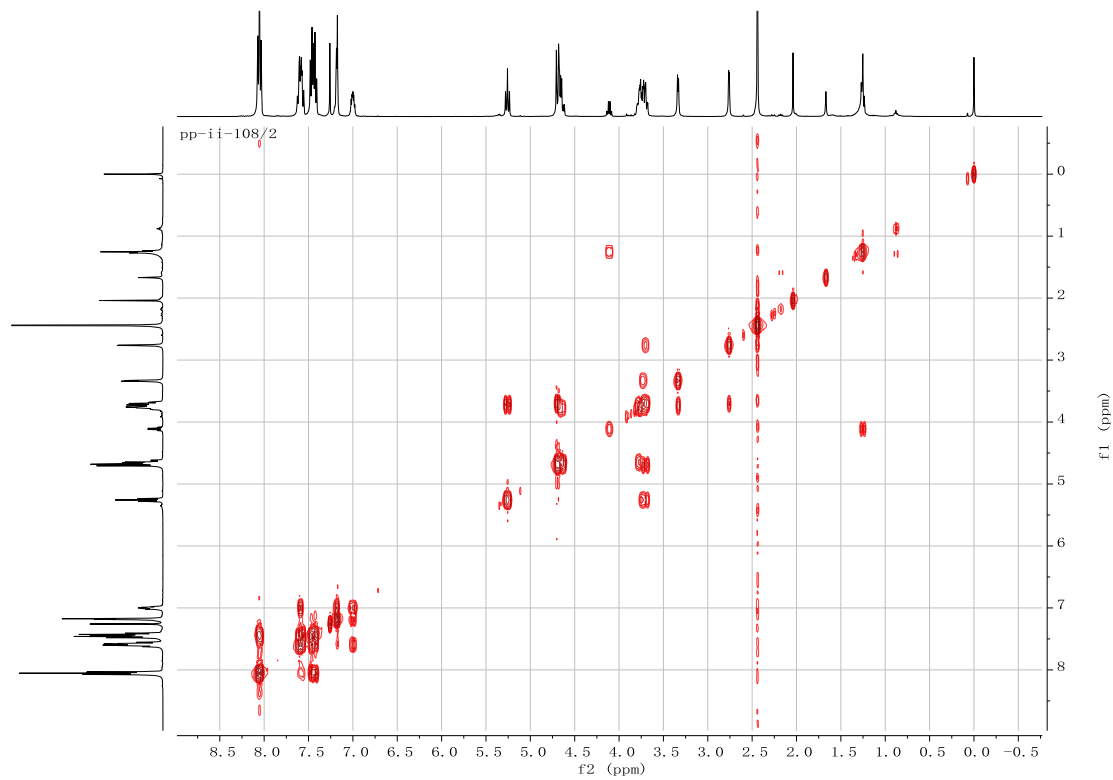



gHSQC (CDCl<sub>3</sub>, 400 MHz) of **2b**

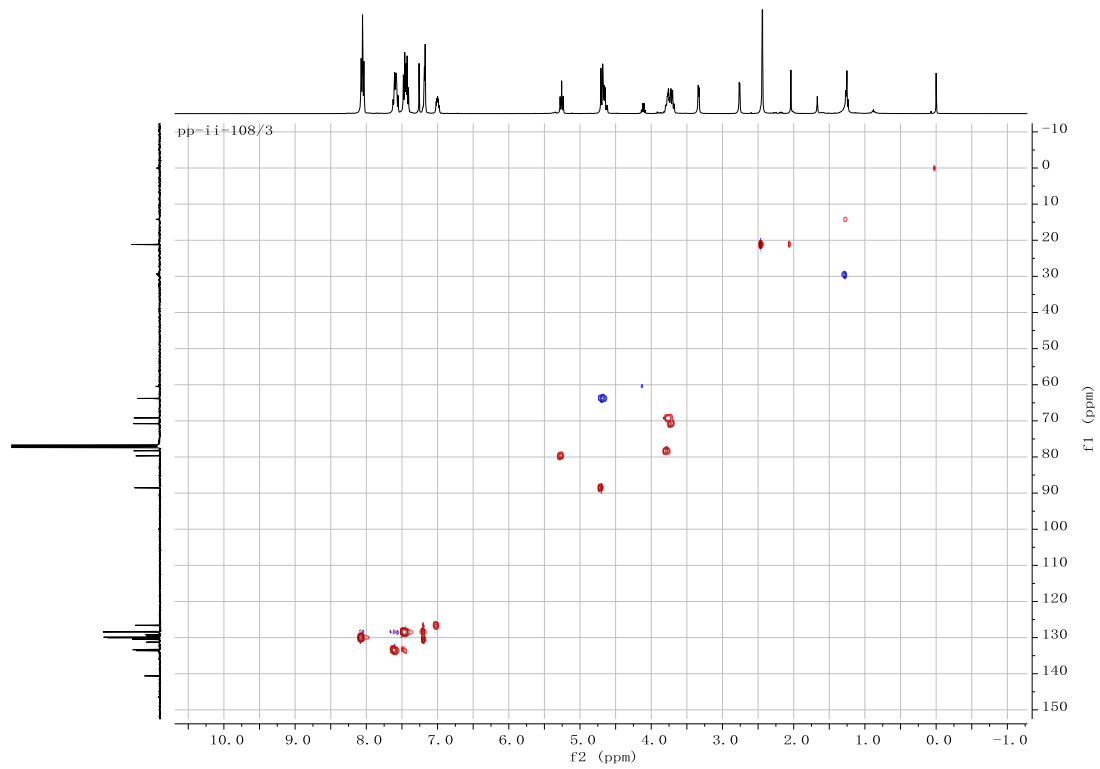

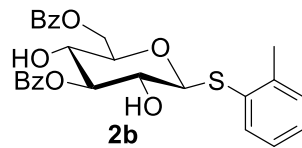

$^{13}\text{C}$  NMR ( $\text{CDCl}_3$ , 101 MHz) of **2b**

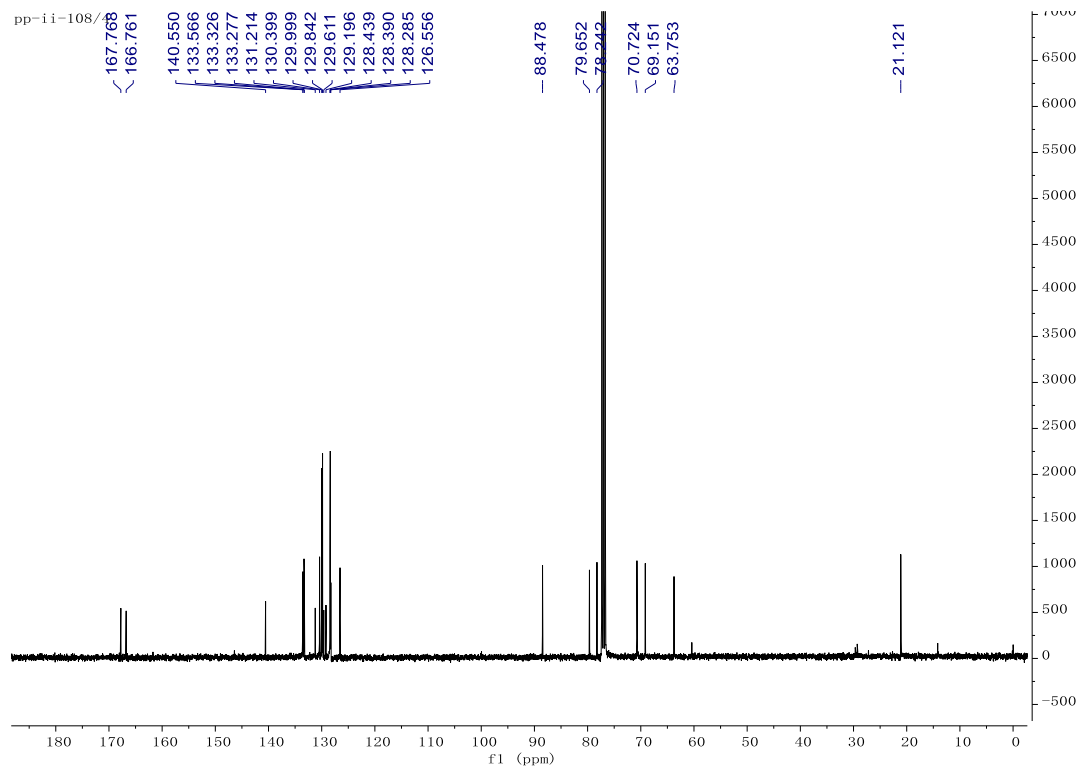

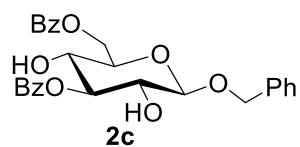

<sup>1</sup>H NMR (CDCl<sub>3</sub>, 400 MHz) of **2c**

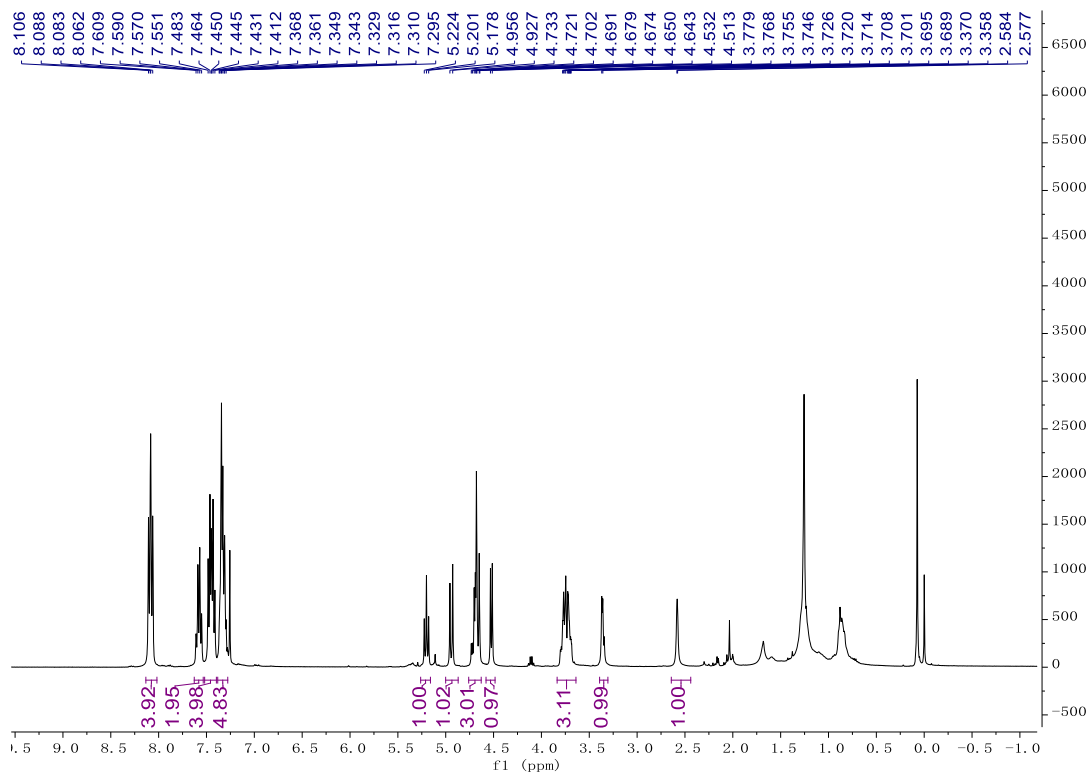



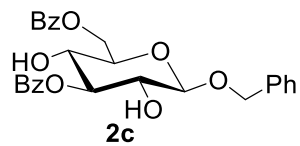

gCOSY (CDCl<sub>3</sub>, 400 MHz) of **2c**

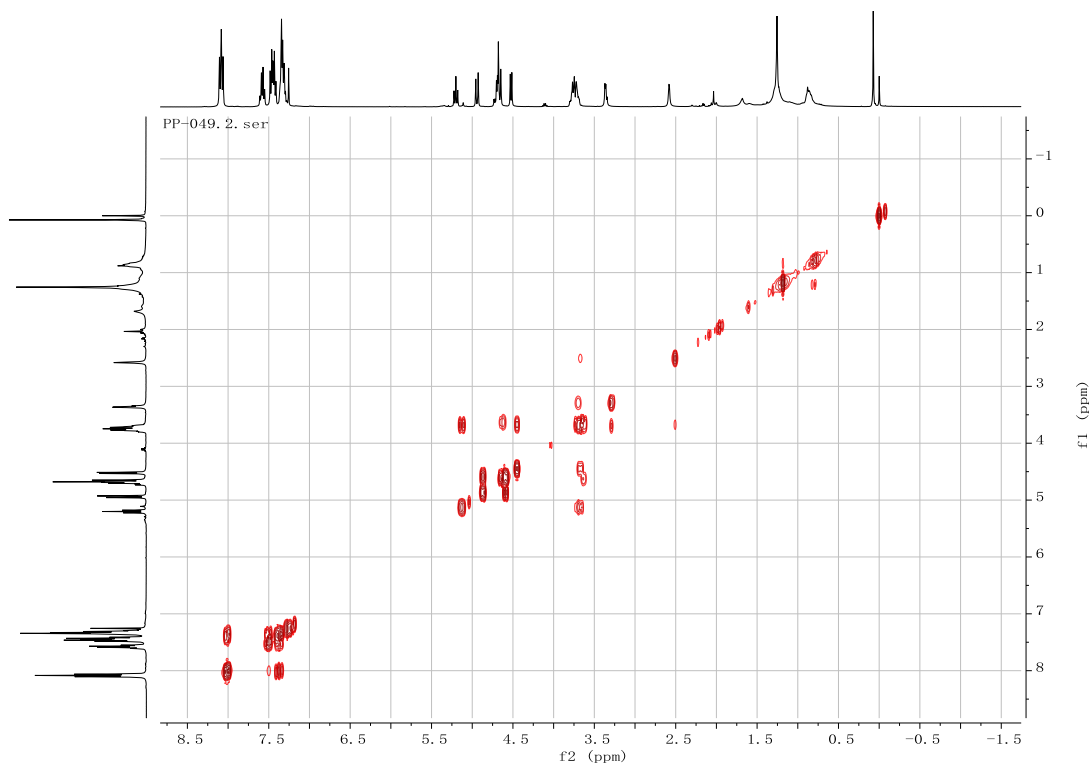



gHSQC (CDCl<sub>3</sub>, 400 MHz) of **2c**

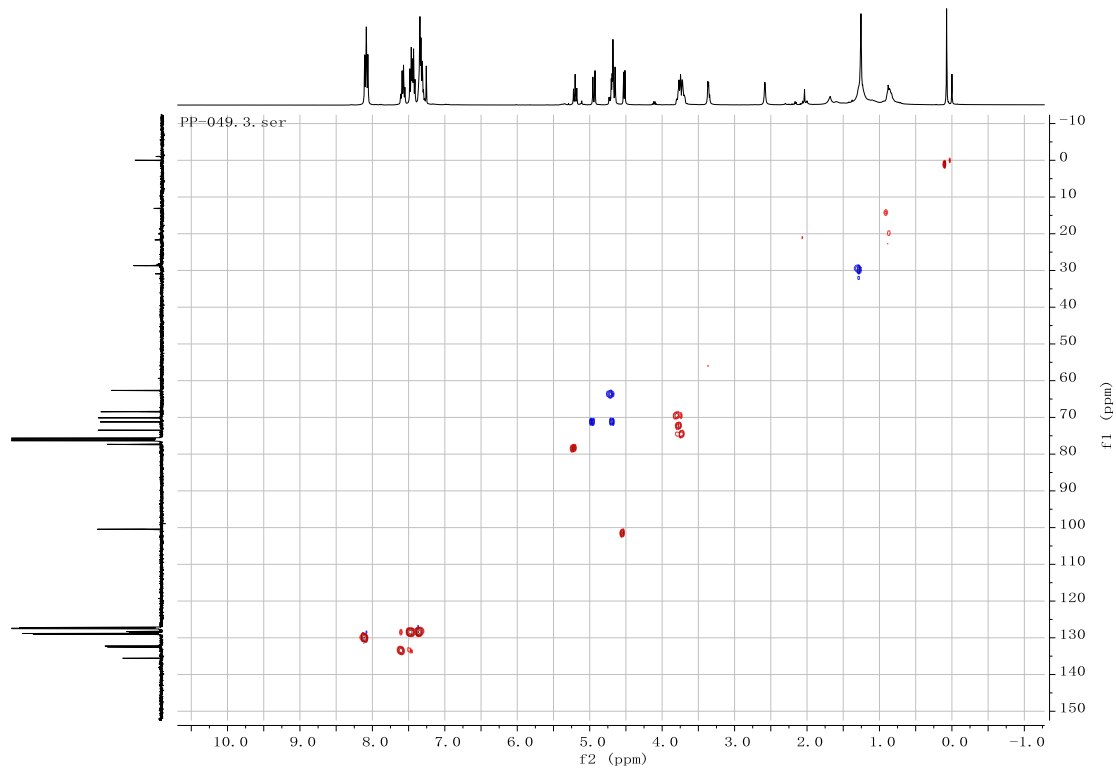

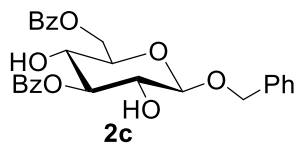

<sup>13</sup>C NMR (CDCl<sub>3</sub>, 101 MHz) of **2c**

PP-049\_4.fid

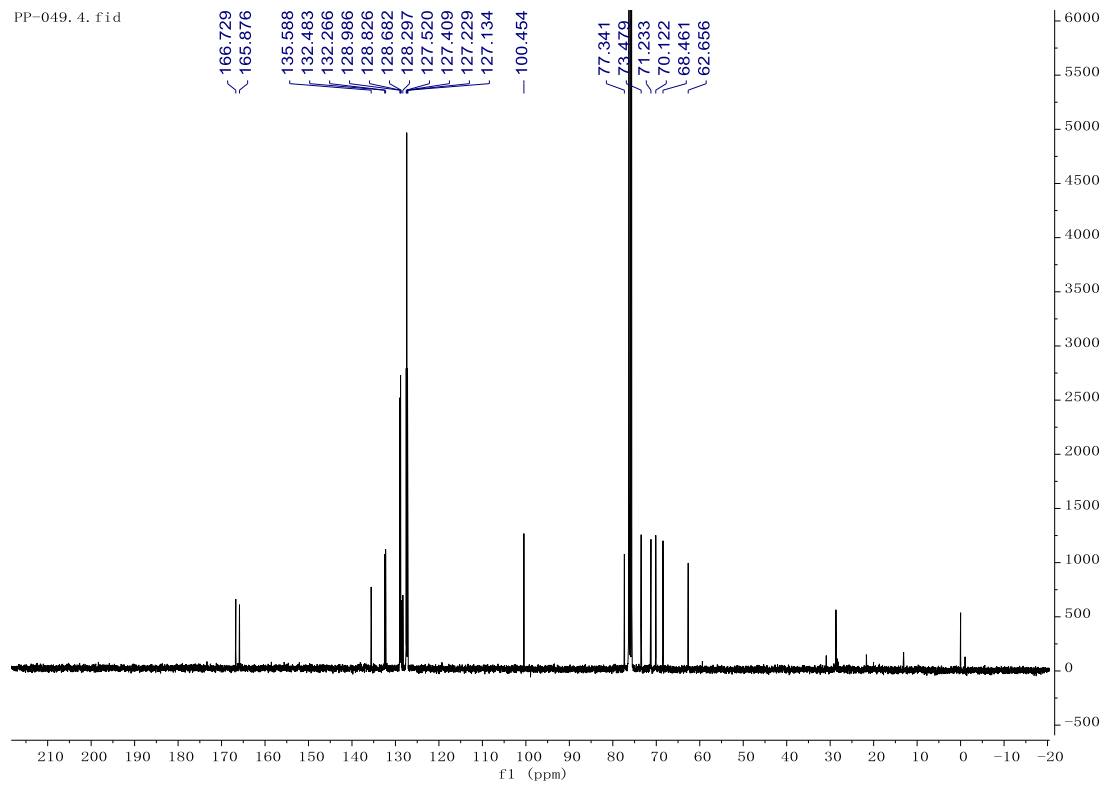

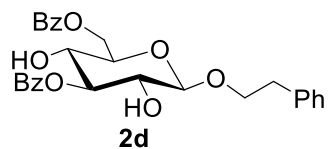

<sup>1</sup>H NMR (CDCl<sub>3</sub>, 400 MHz) of **2d**

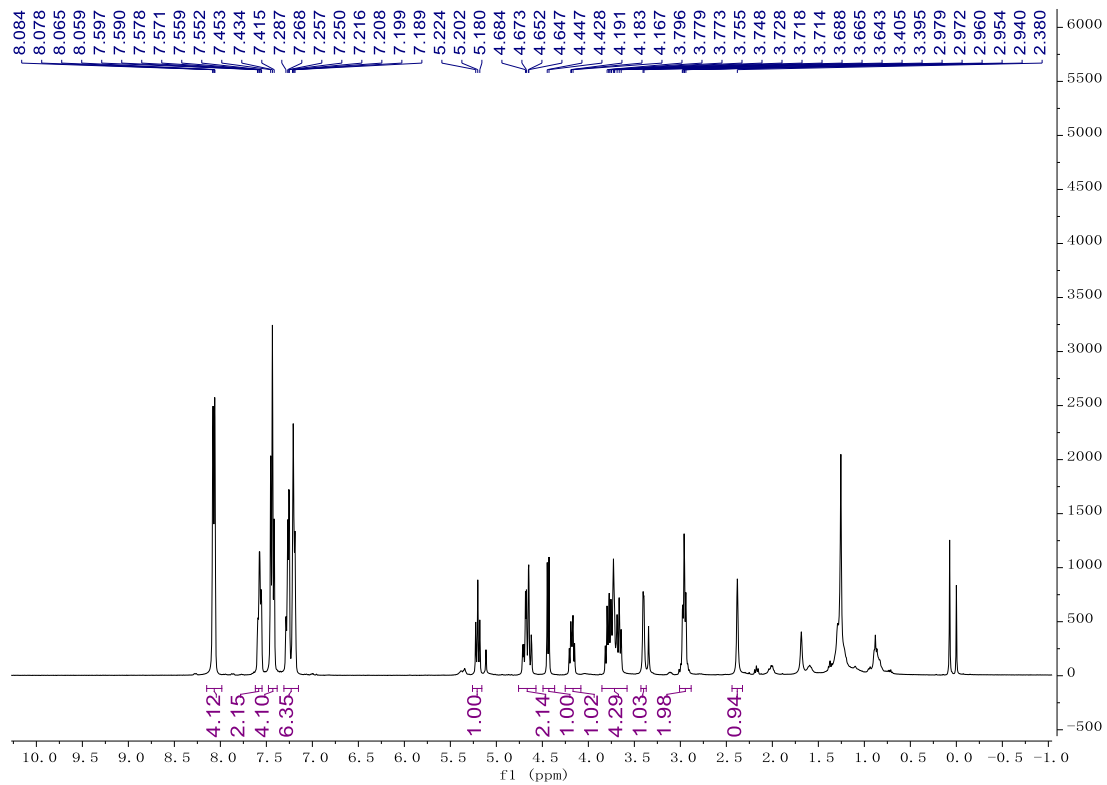

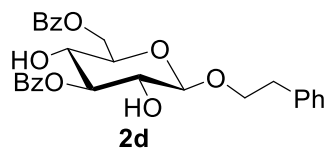

gCOSY (CDCl<sub>3</sub>, 400 MHz) of 2d

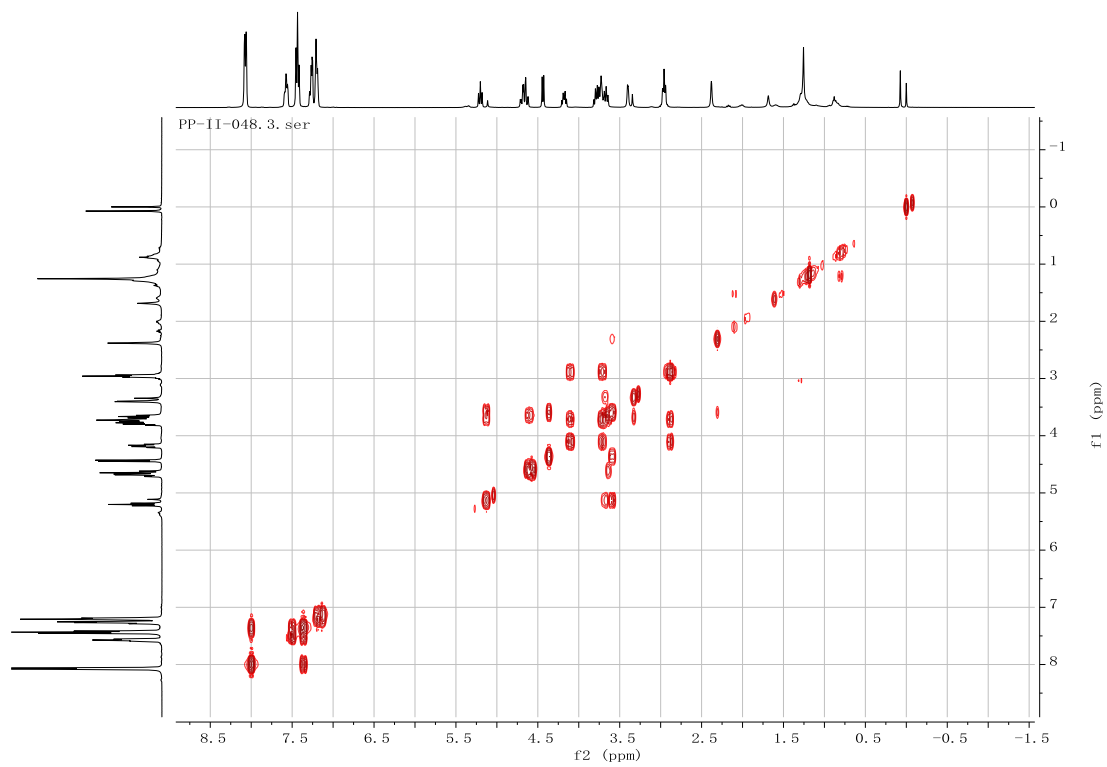

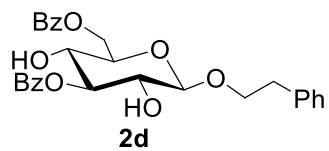

gHSQC (CDCl<sub>3</sub>, 400 MHz) of 2d

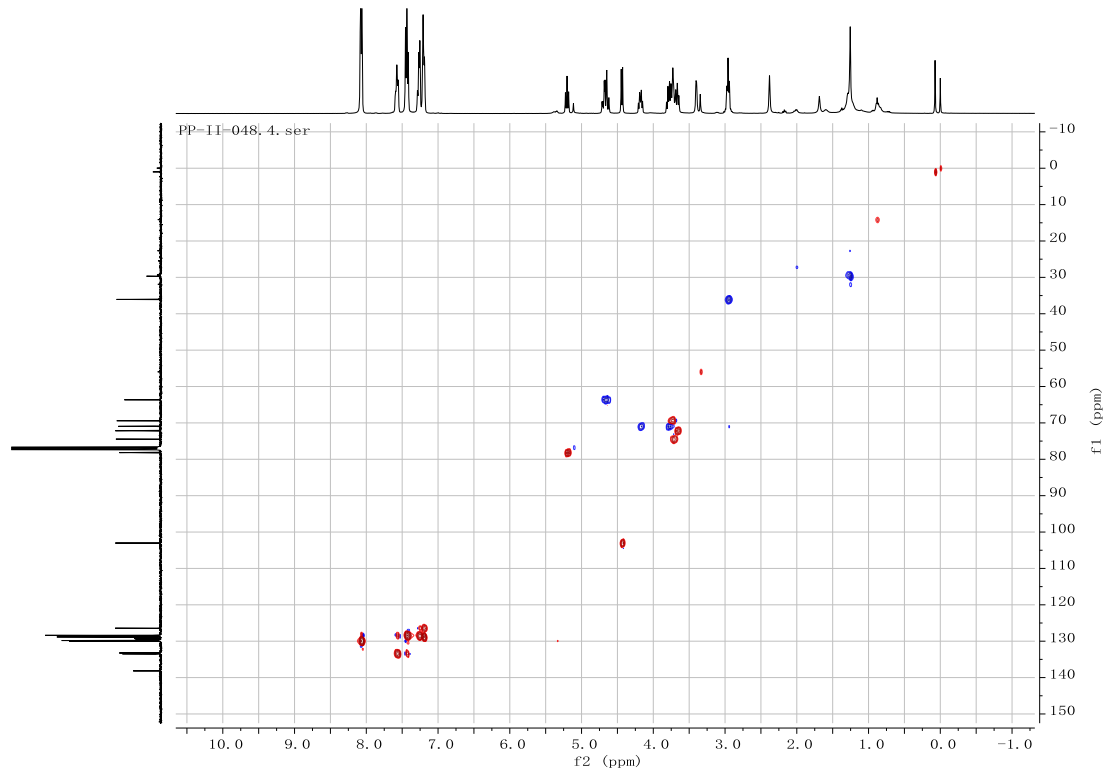

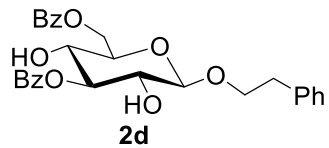

<sup>13</sup>C NMR (CDCl<sub>3</sub>, 101 MHz) of **2d**

PP-II-048.5.fid

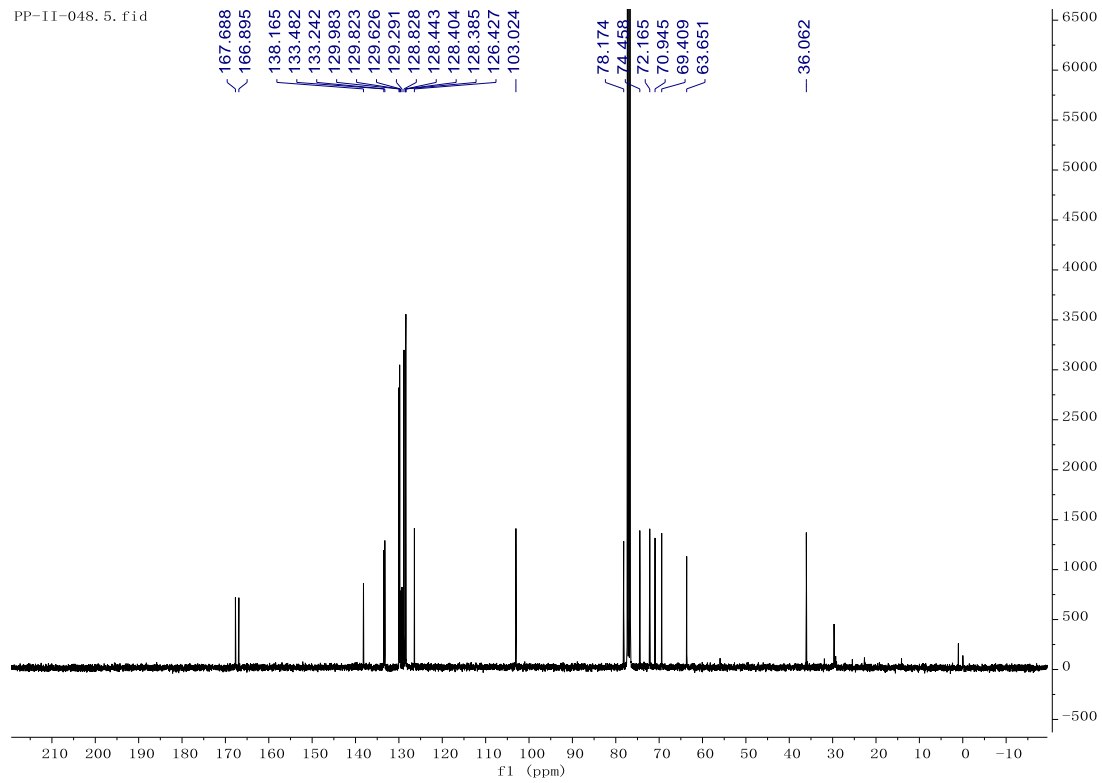

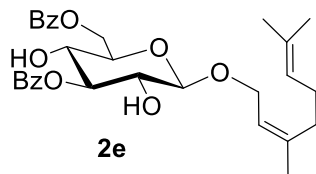

$^1\text{H NMR}$  ( $\text{CDCl}_3$ , 400 MHz) of **2e**

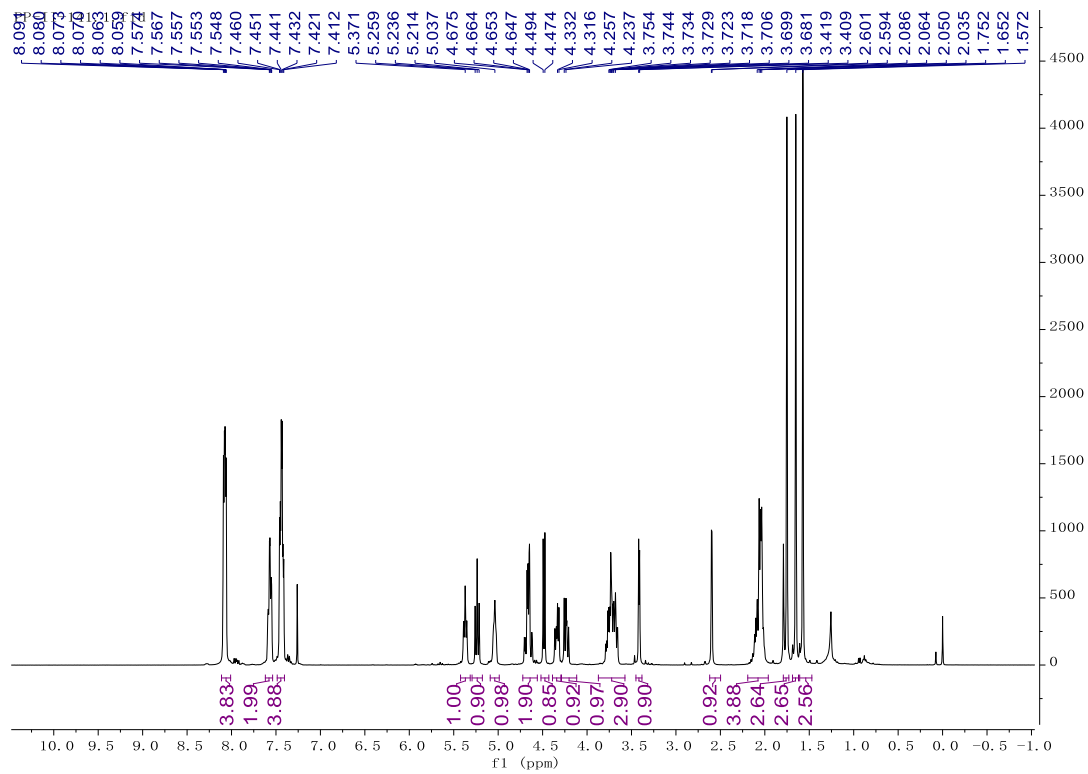



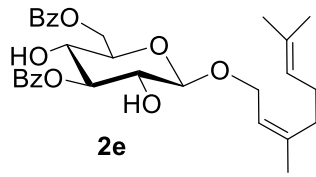

gCOSY (CDCl<sub>3</sub>, 400 MHz) of **2e**

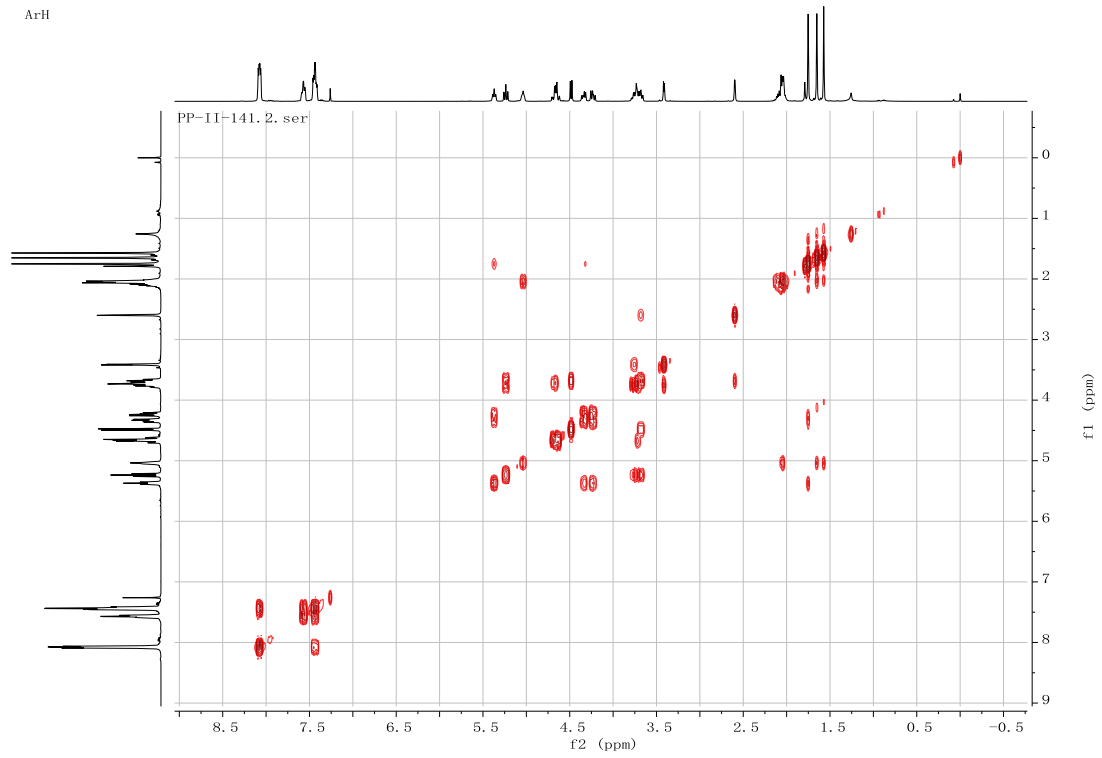

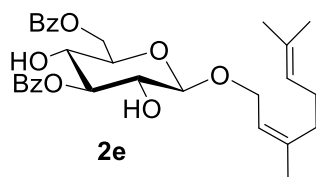

gHSQC (CDCl<sub>3</sub>, 400 MHz) of **2e**

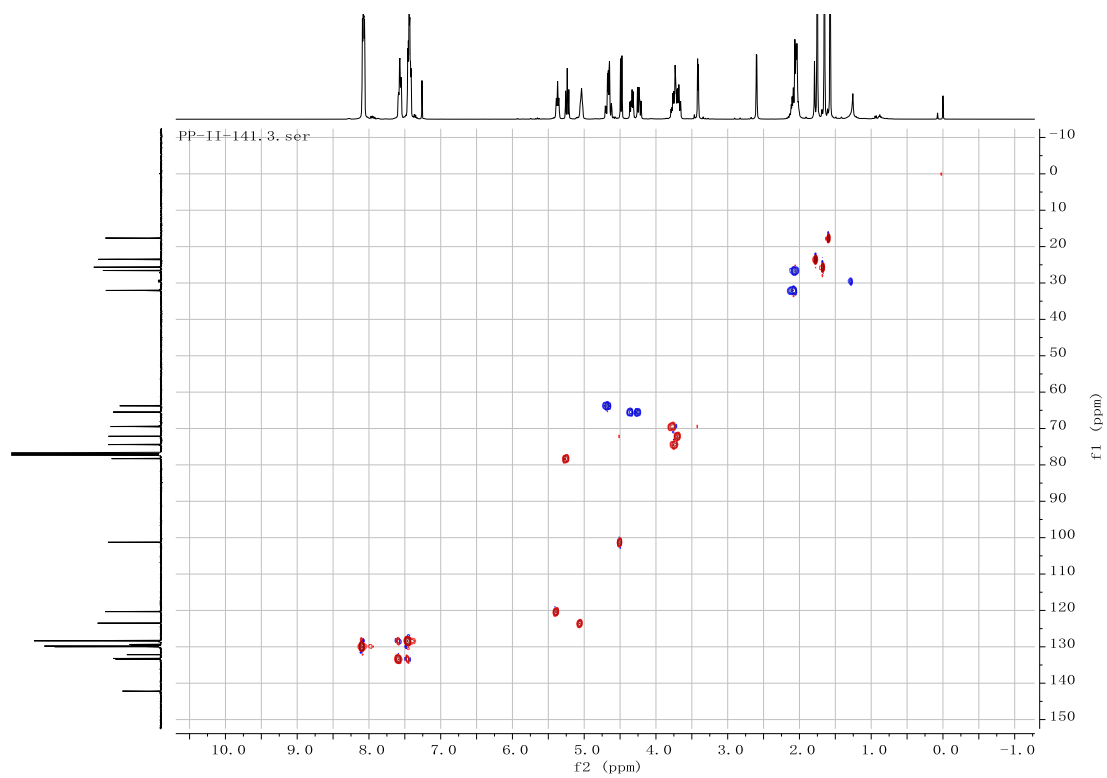

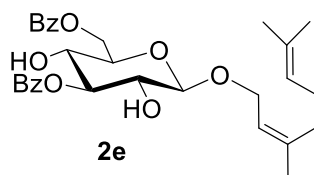

<sup>13</sup>C NMR (CDCl<sub>3</sub>, 101 MHz) of **2e**

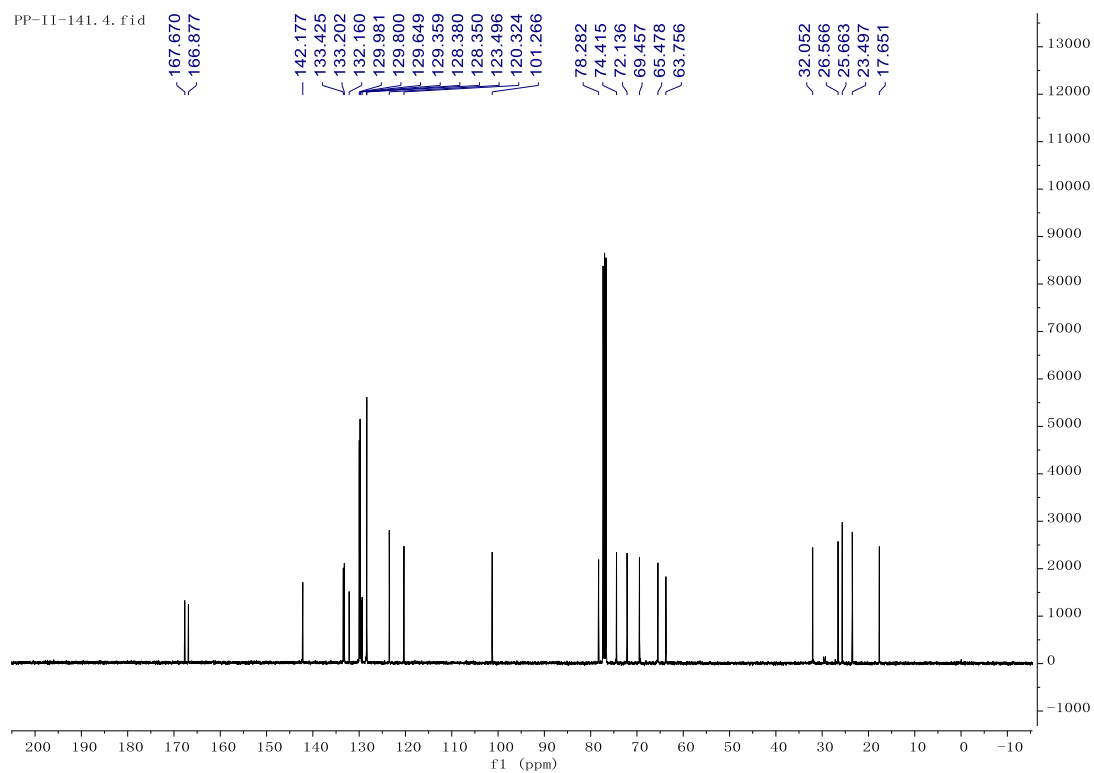

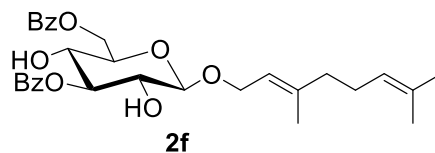

$^1\text{H NMR}$  ( $\text{CDCl}_3$ , 400 MHz) of **2f**

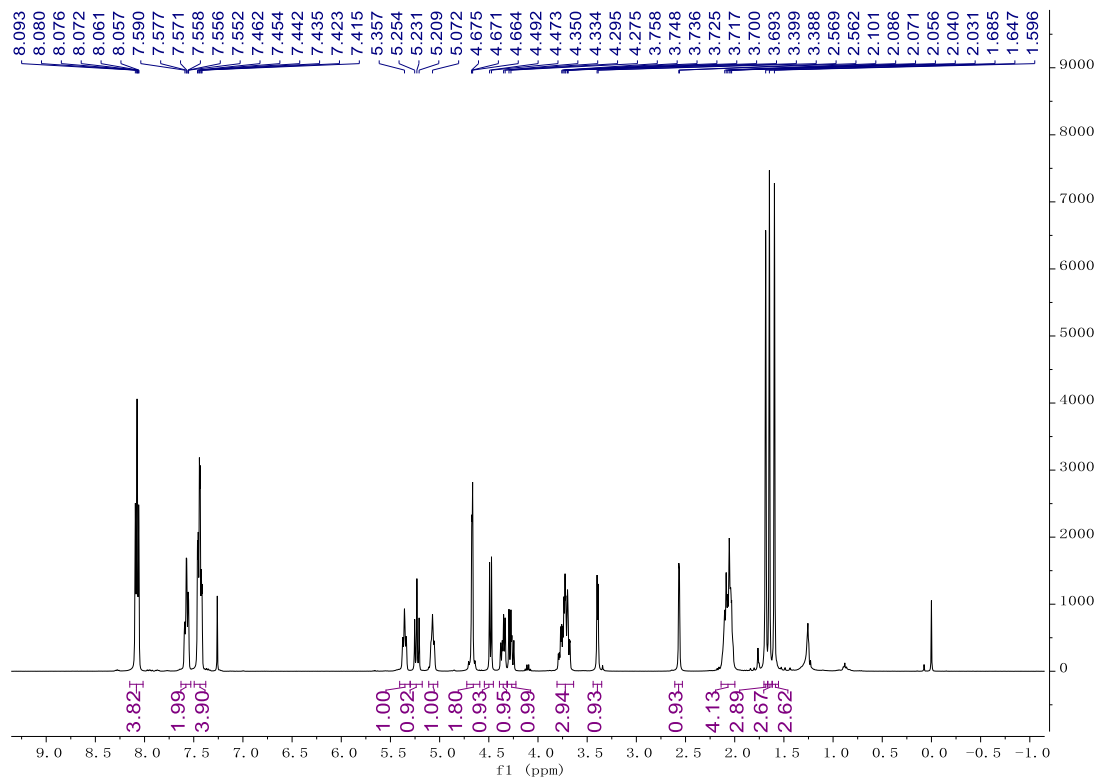

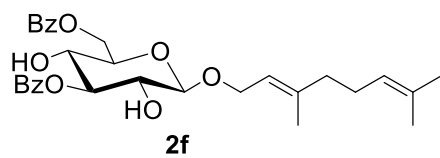

gCOSY (CDCl<sub>3</sub>, 400 MHz) of **2f**

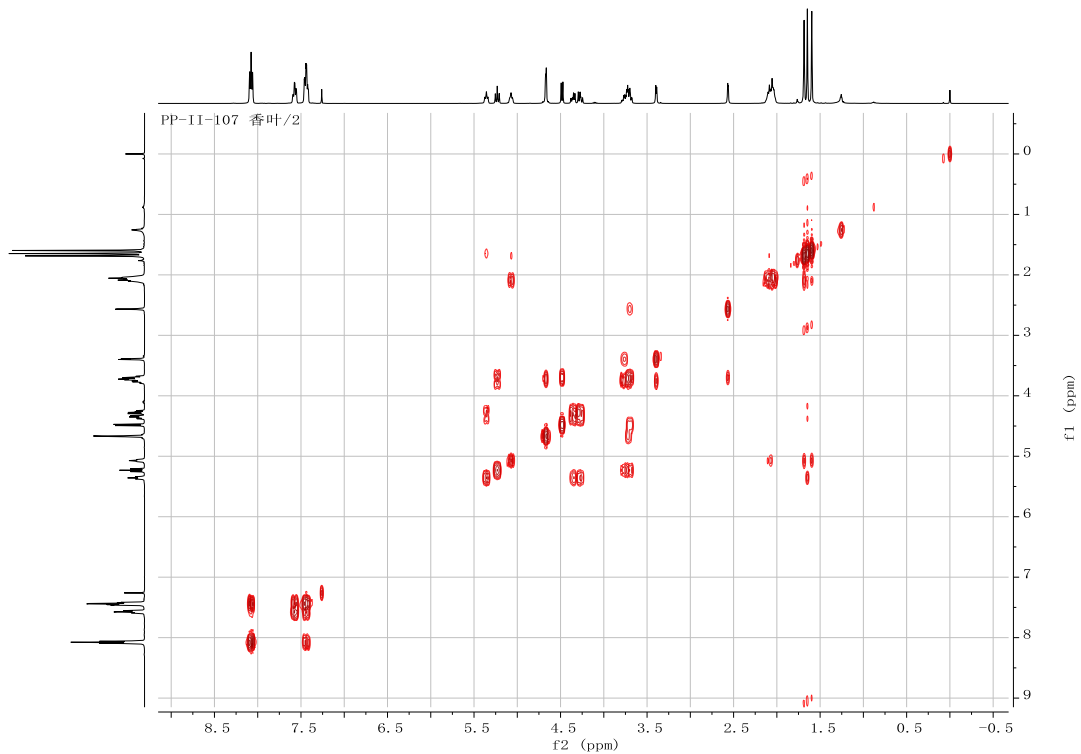

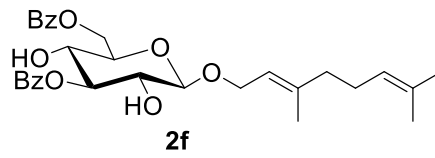

gHSQC ( $\text{CDCl}_3$ , 400 MHz) of **2f**

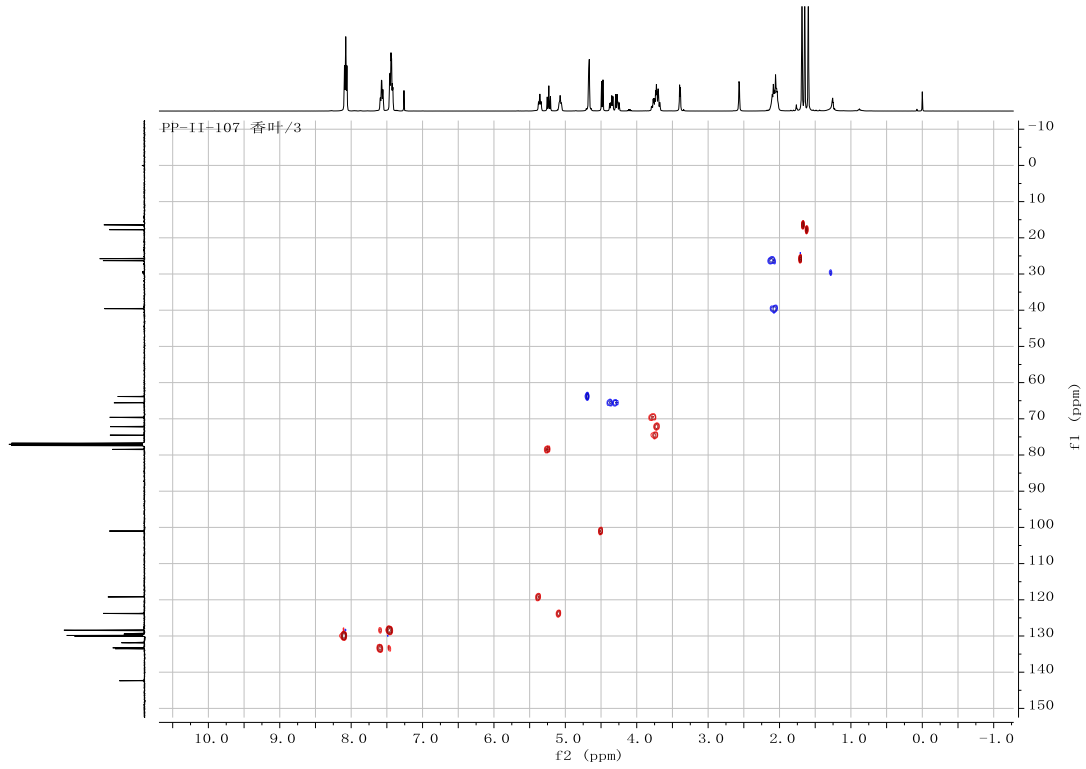



<sup>13</sup>C NMR (CDCl<sub>3</sub>, 101 MHz) of **2f**

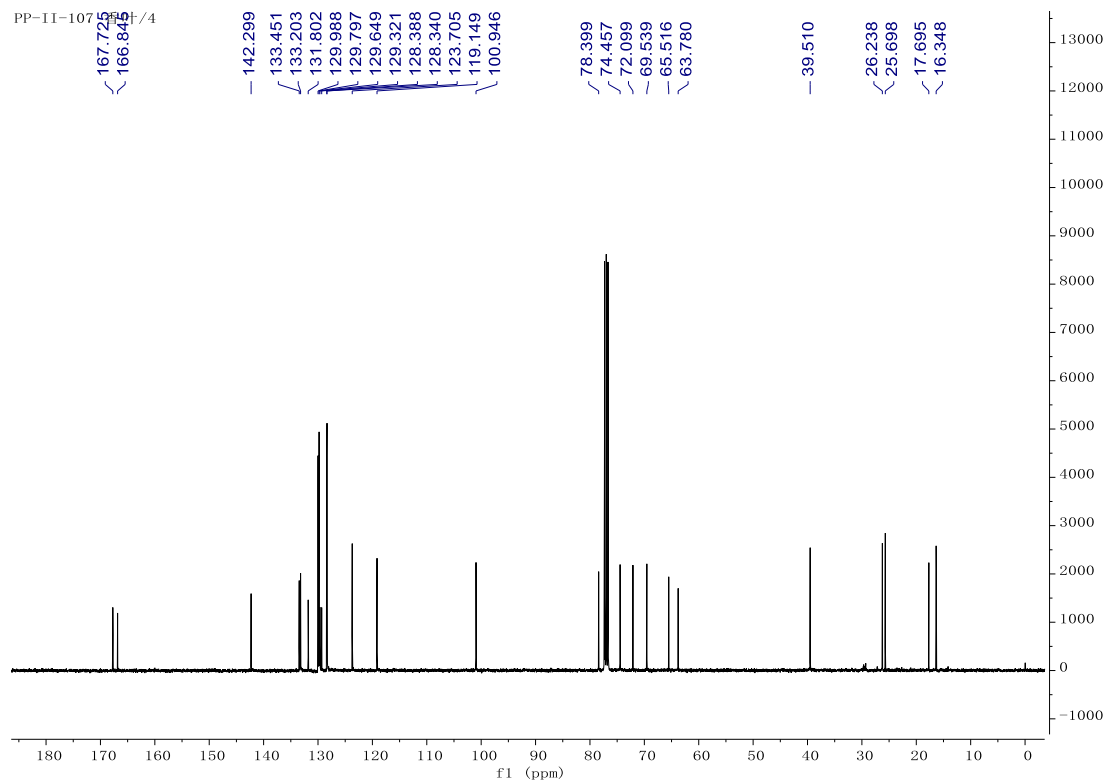

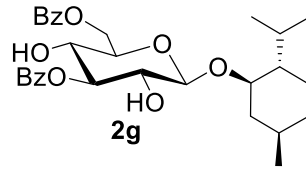

<sup>1</sup>H NMR (CDCl<sub>3</sub>, 400 MHz) of **2g**

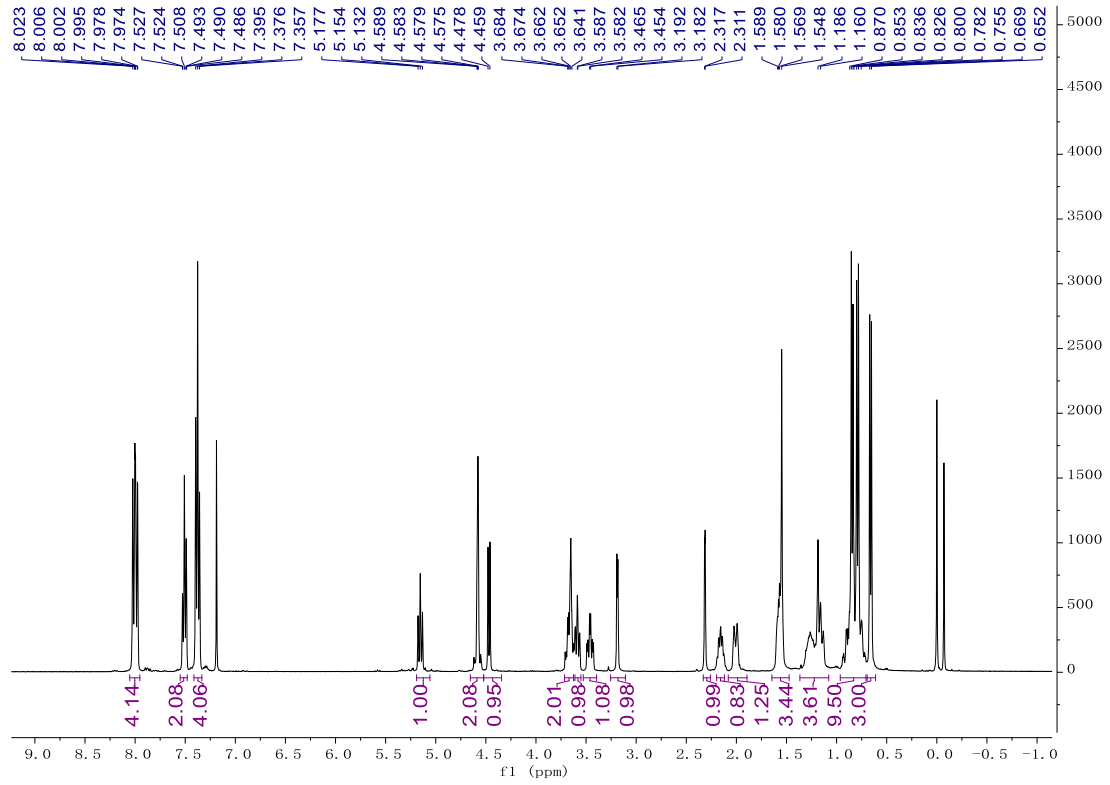



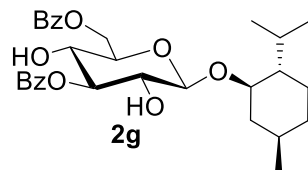

gCOSY (CDCl<sub>3</sub>, 400 MHz) of **2g**

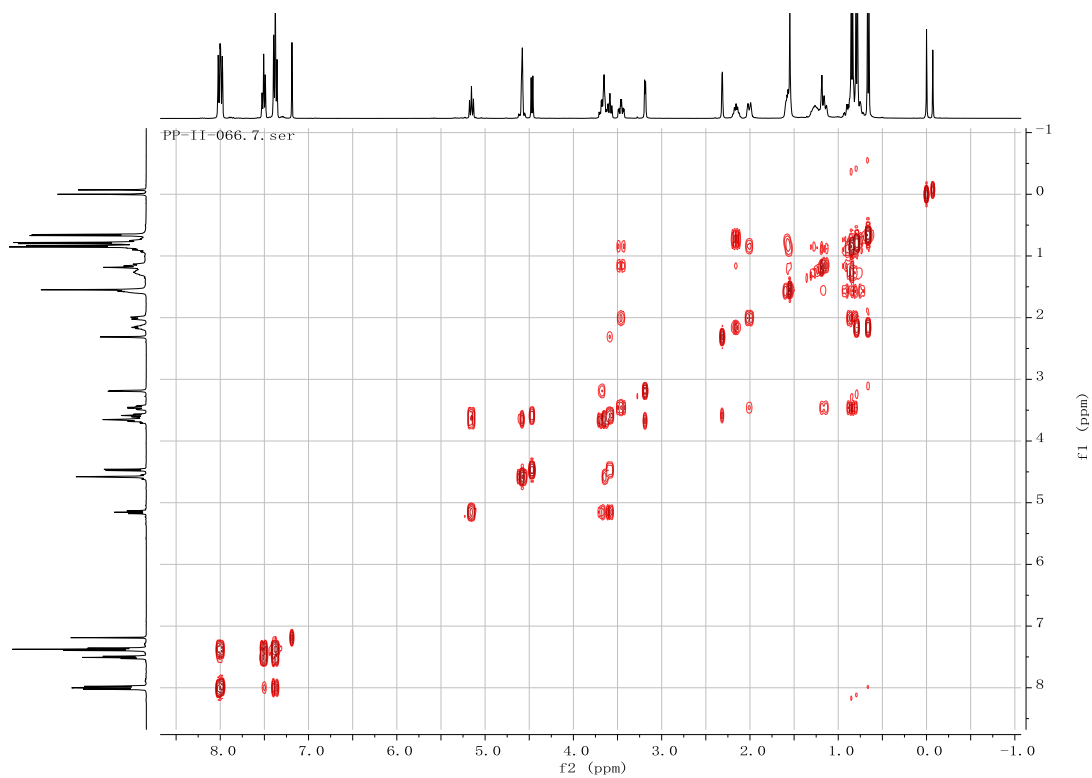



gHSQC (CDCl<sub>3</sub>, 400 MHz) of **2g**

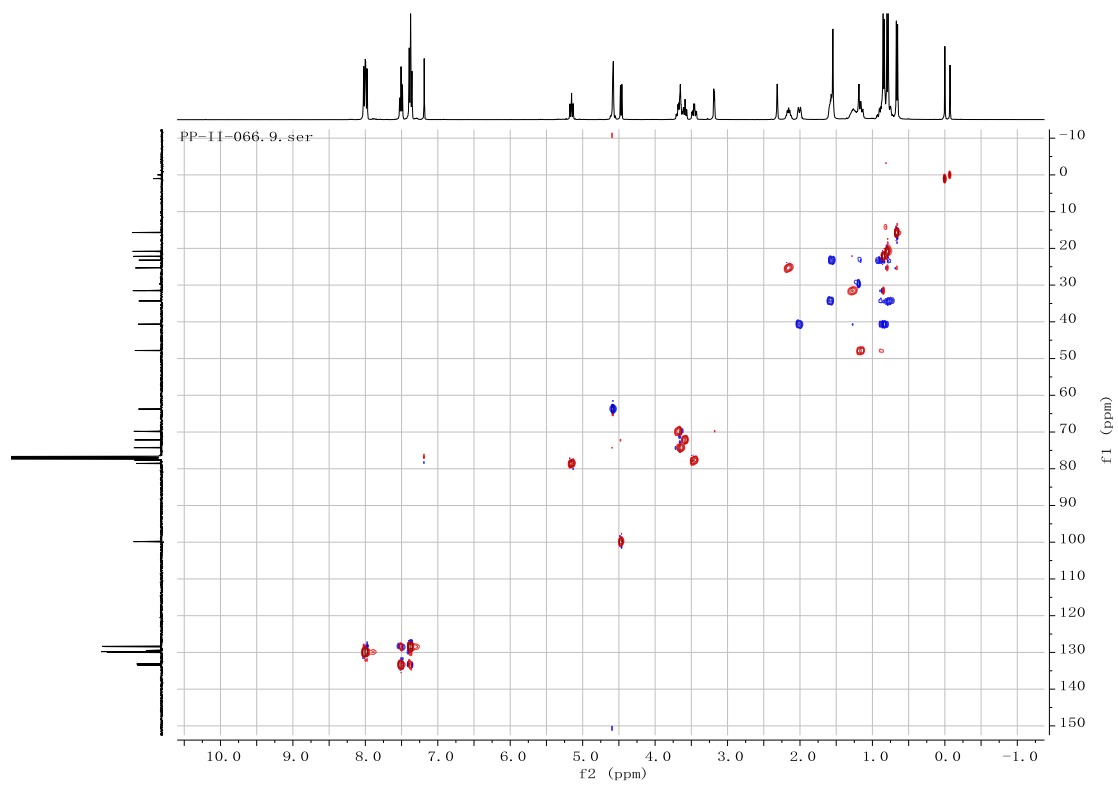



<sup>13</sup>C NMR (CDCl<sub>3</sub>, 101 MHz) of **2g**

PP-II-066. 10. fid

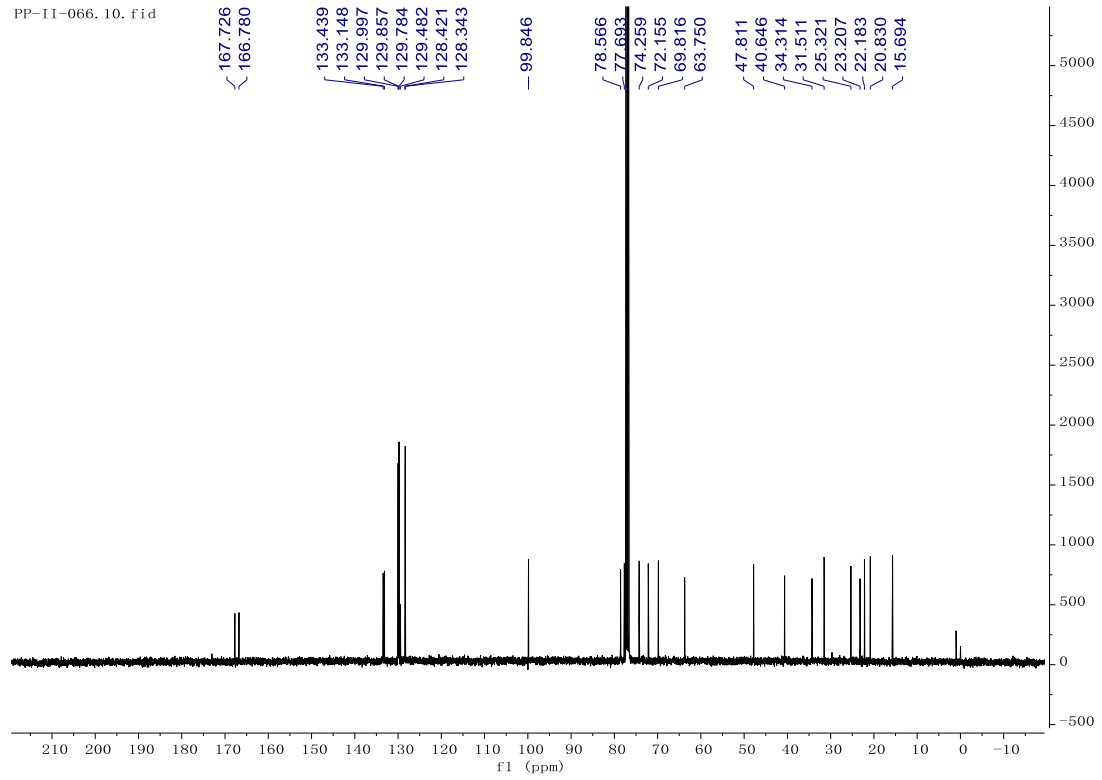

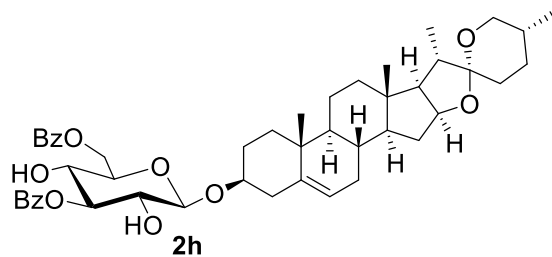

$^1\text{H}$  NMR ( $\text{CDCl}_3$ , 400 MHz) of **2h**

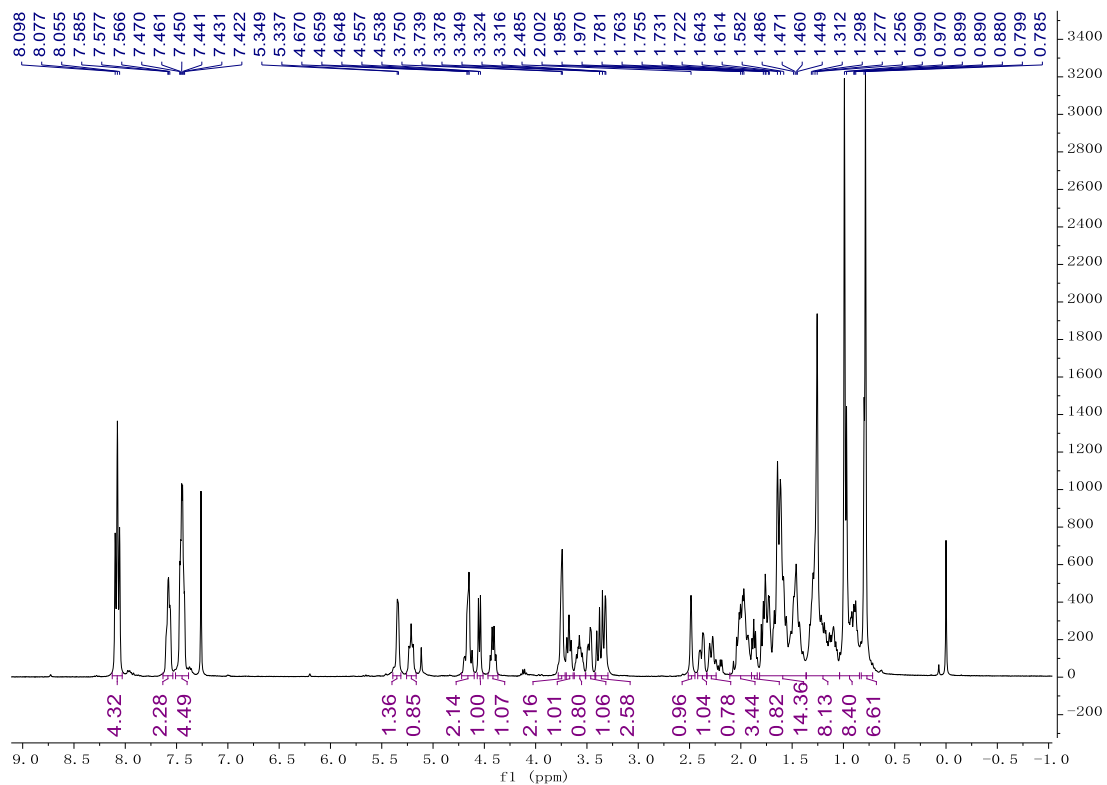

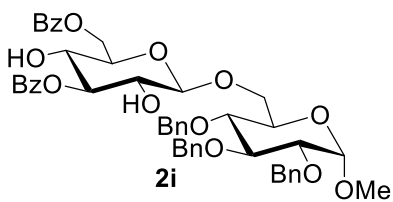

<sup>1</sup>H NMR (CDCl<sub>3</sub>, 400 MHz) of **2i**

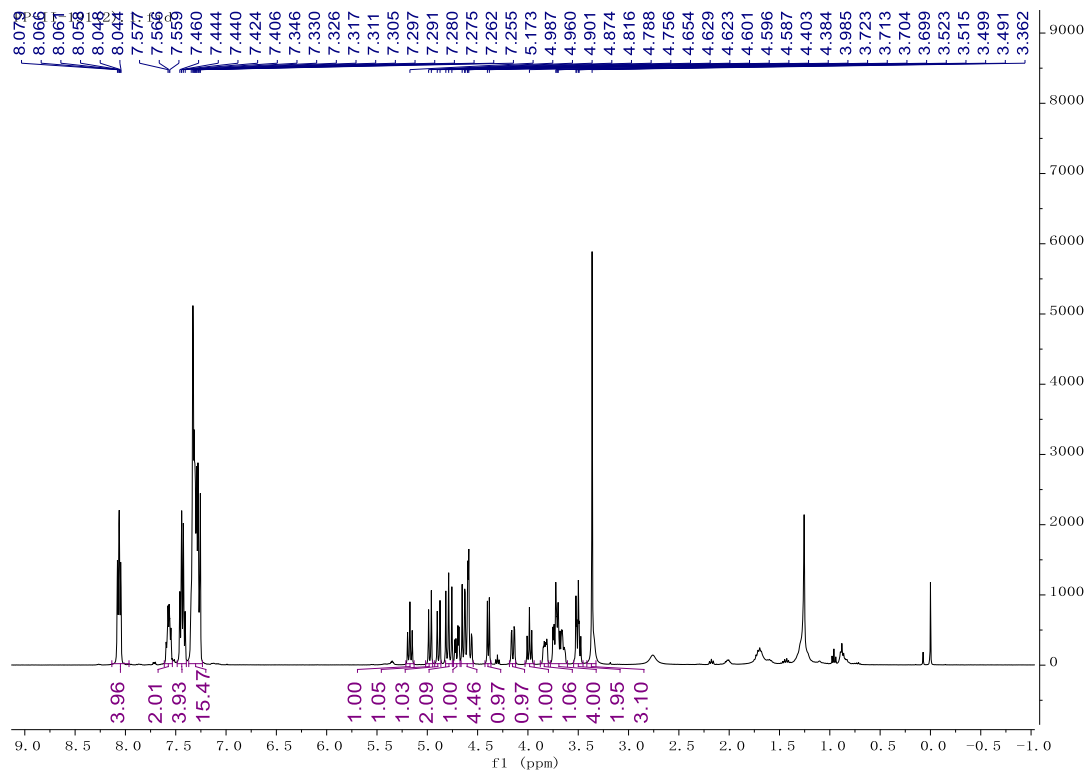

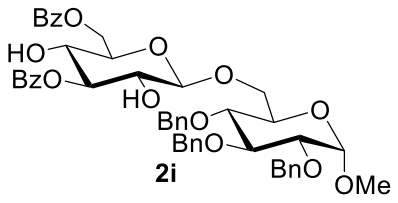

gCOSY (CDCl<sub>3</sub>, 400 MHz) of **2i**

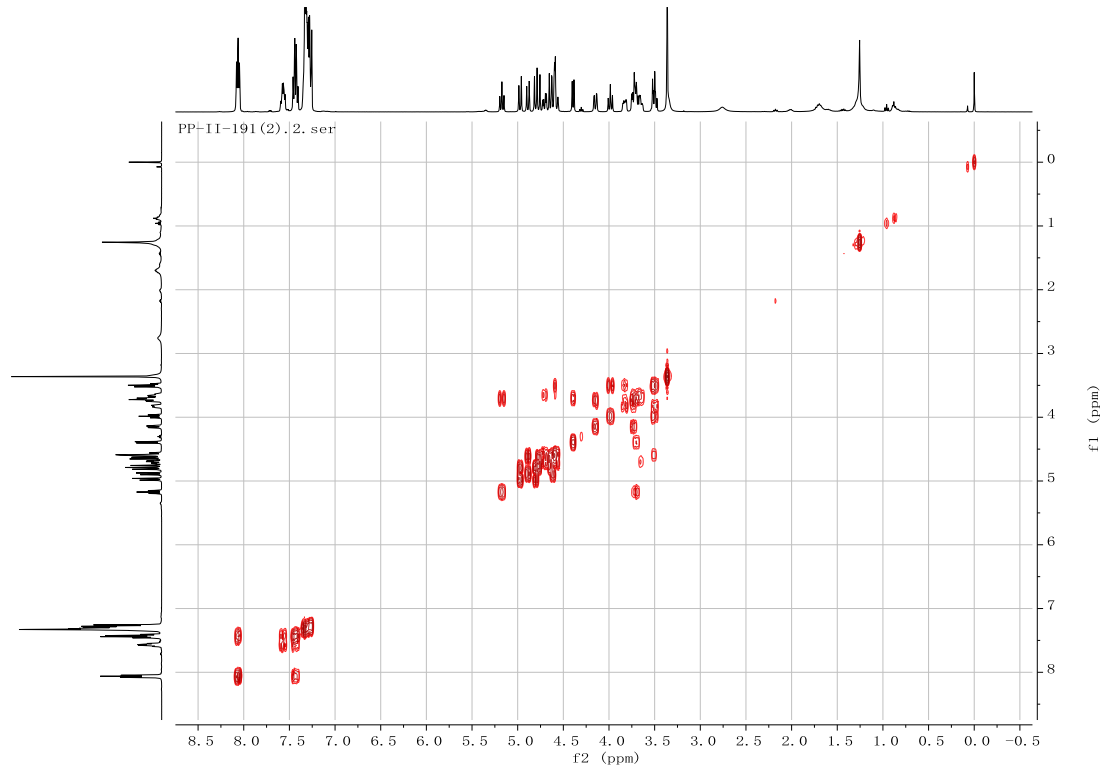

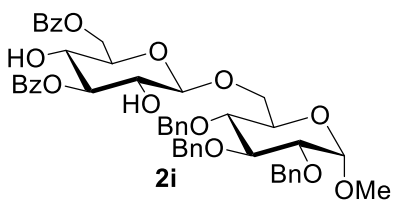

gHSQC (CDCl<sub>3</sub>, 400 MHz) of **2i**

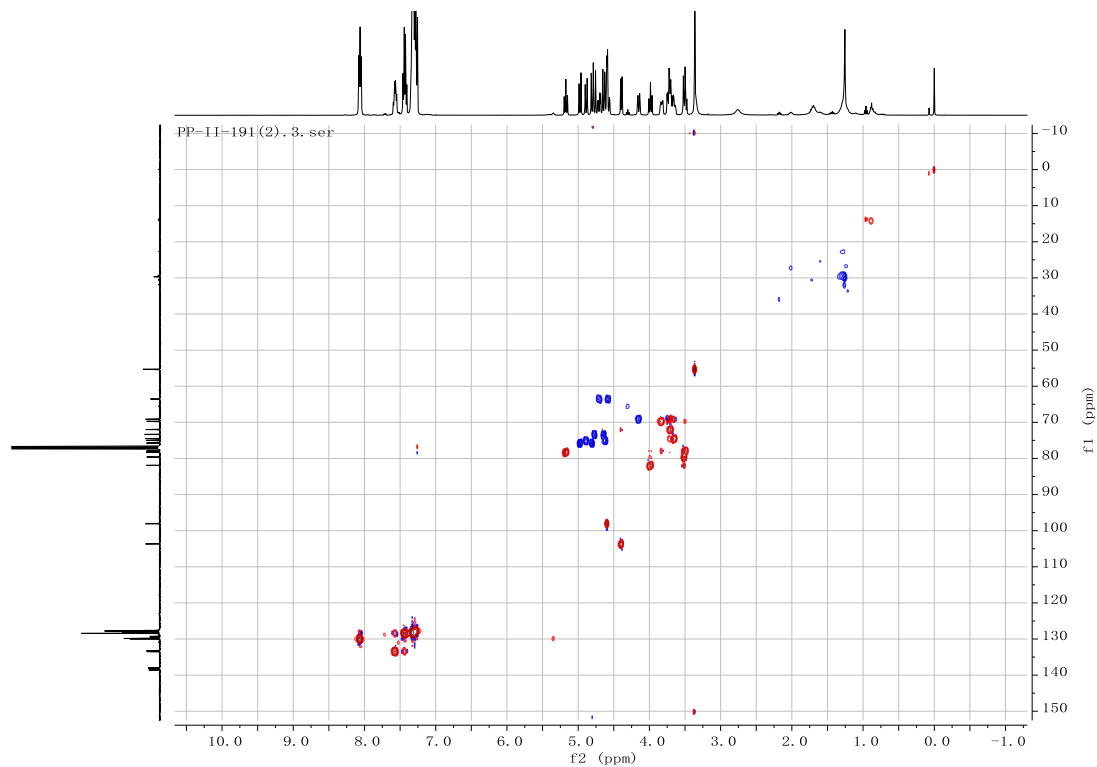

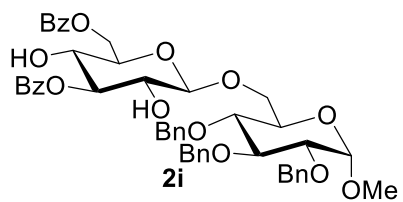

<sup>13</sup>C NMR (CDCl<sub>3</sub>, 101 MHz) of **2i**

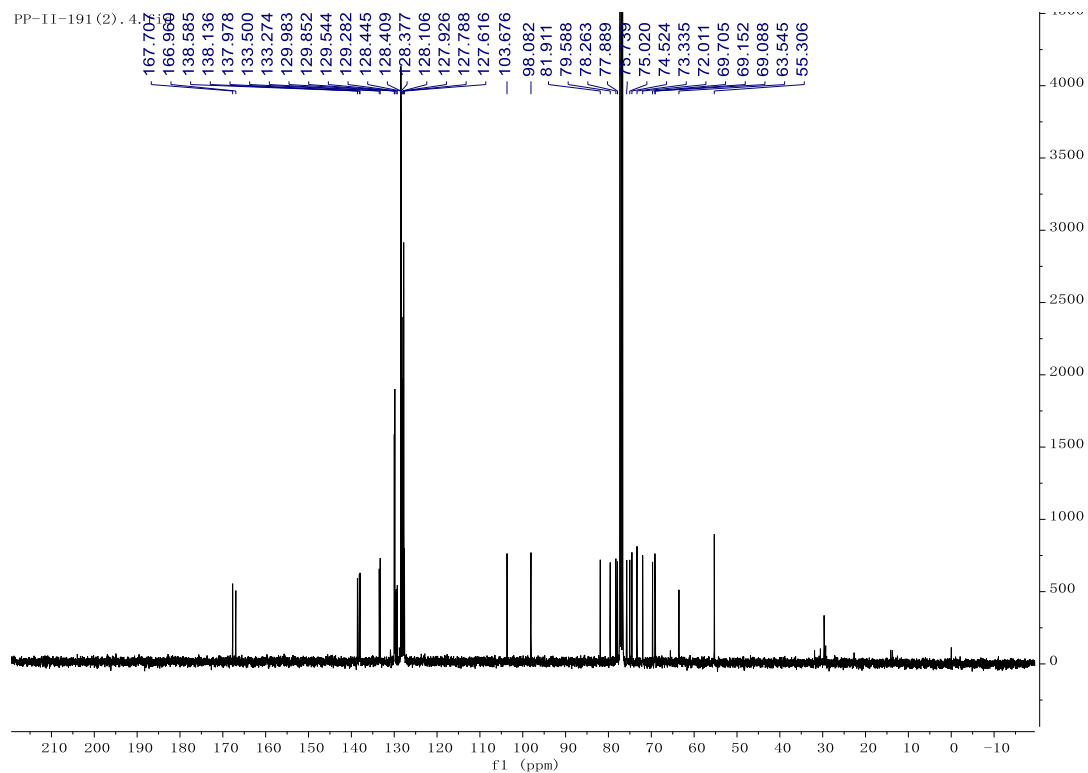



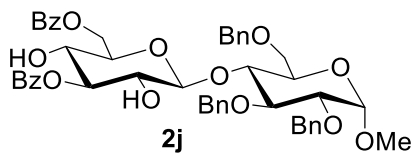

<sup>1</sup>H NMR (CDCl<sub>3</sub>, 400 MHz) of **2j**

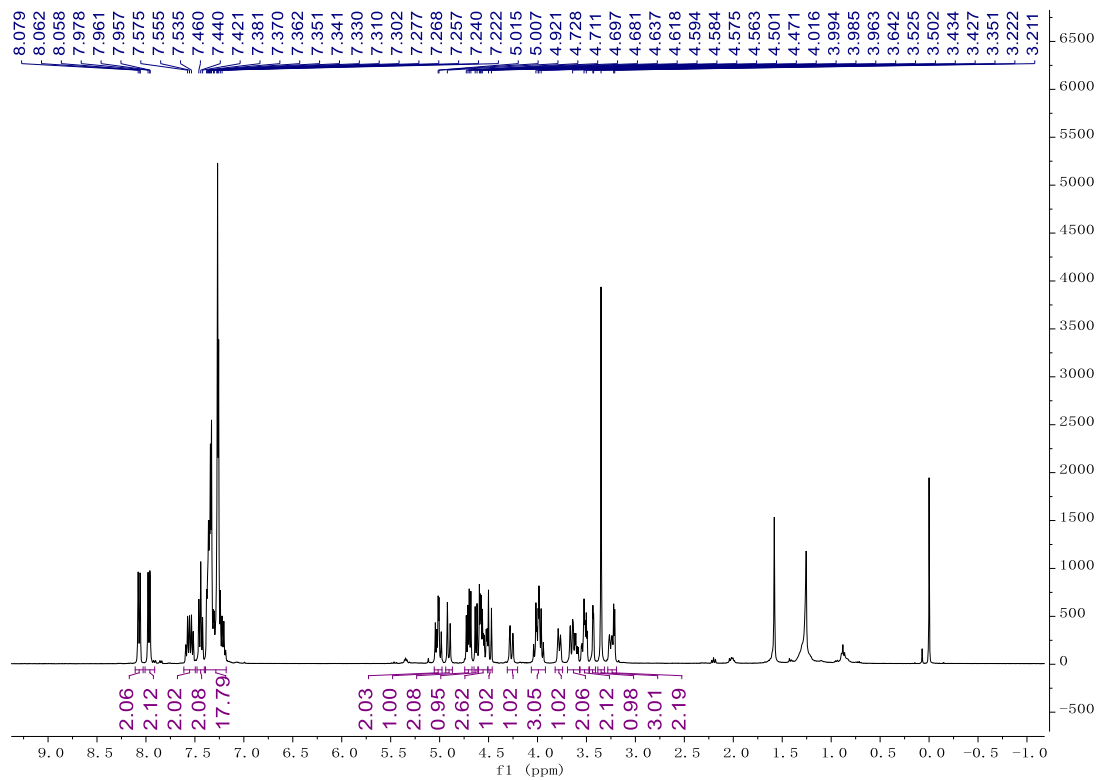

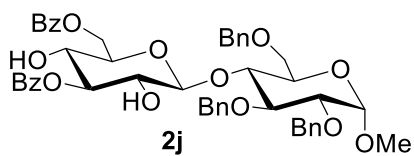

gCOSY (CDCl<sub>3</sub>, 400 MHz) of **2j**

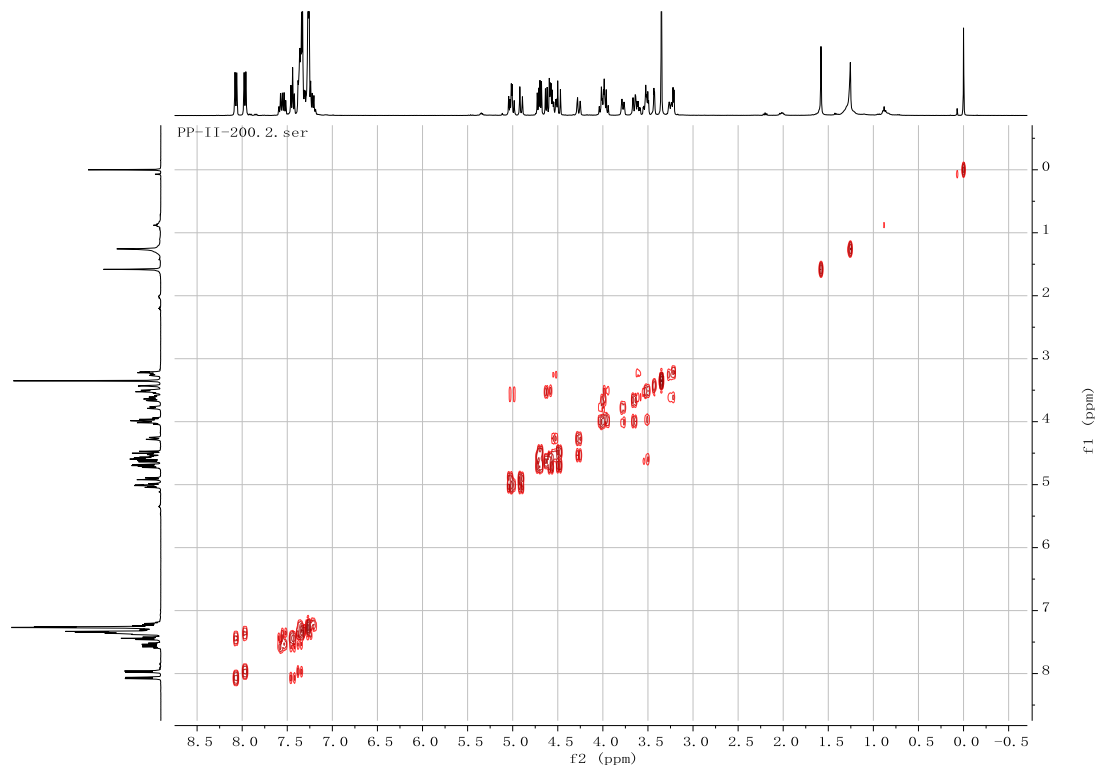



gHSQC (CDCl<sub>3</sub>, 400 MHz) of **2j**

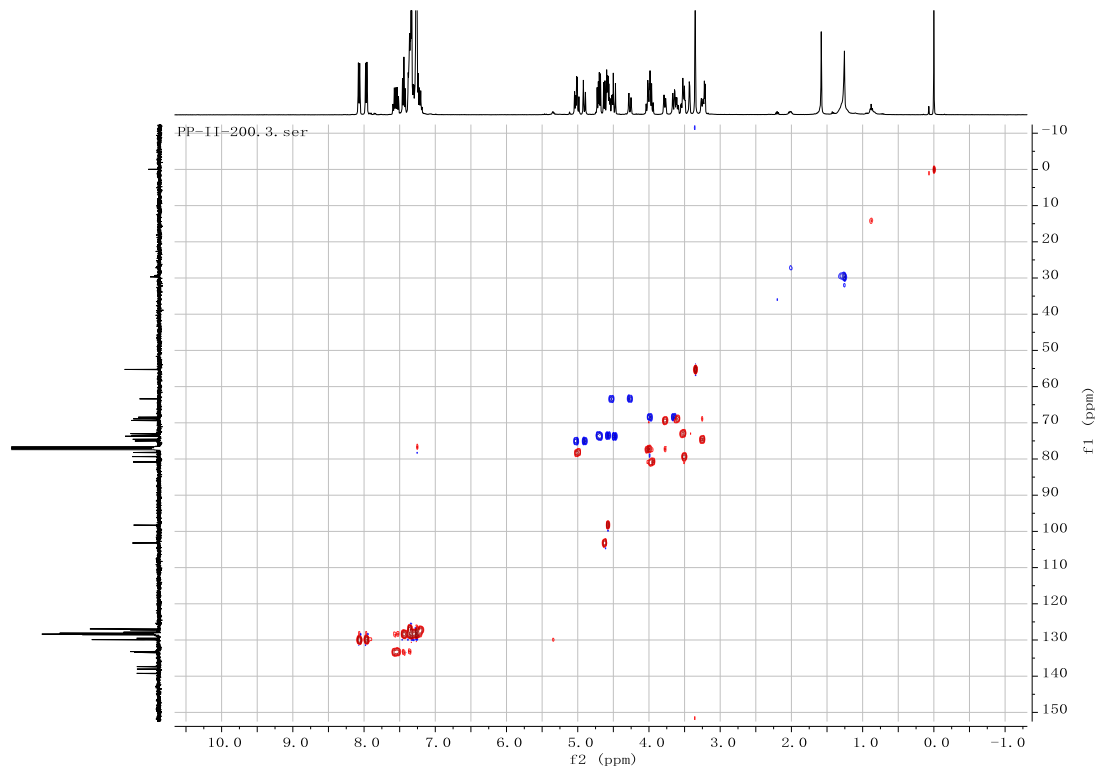



<sup>13</sup>C NMR (CDCl<sub>3</sub>, 101 MHz) of **2j**

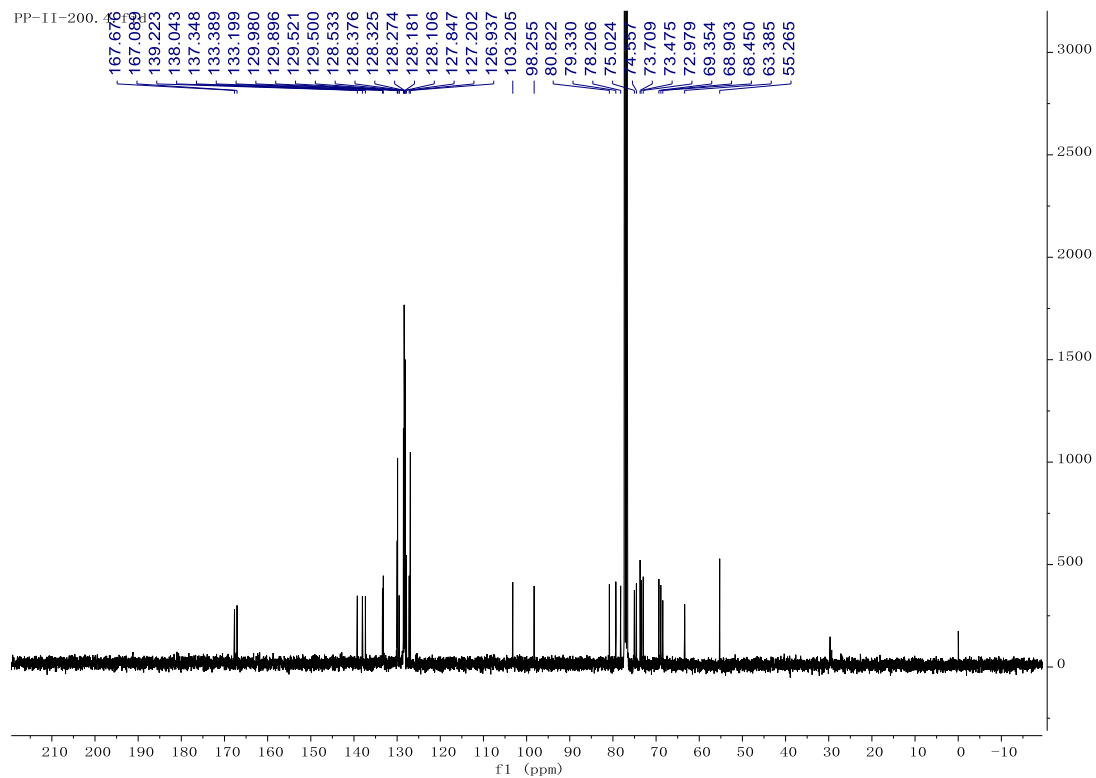

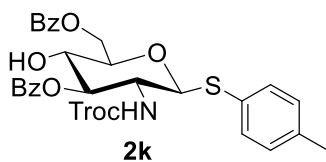

$^1\text{H NMR}$  ( $\text{CDCl}_3$ , 400 MHz) of **2k**

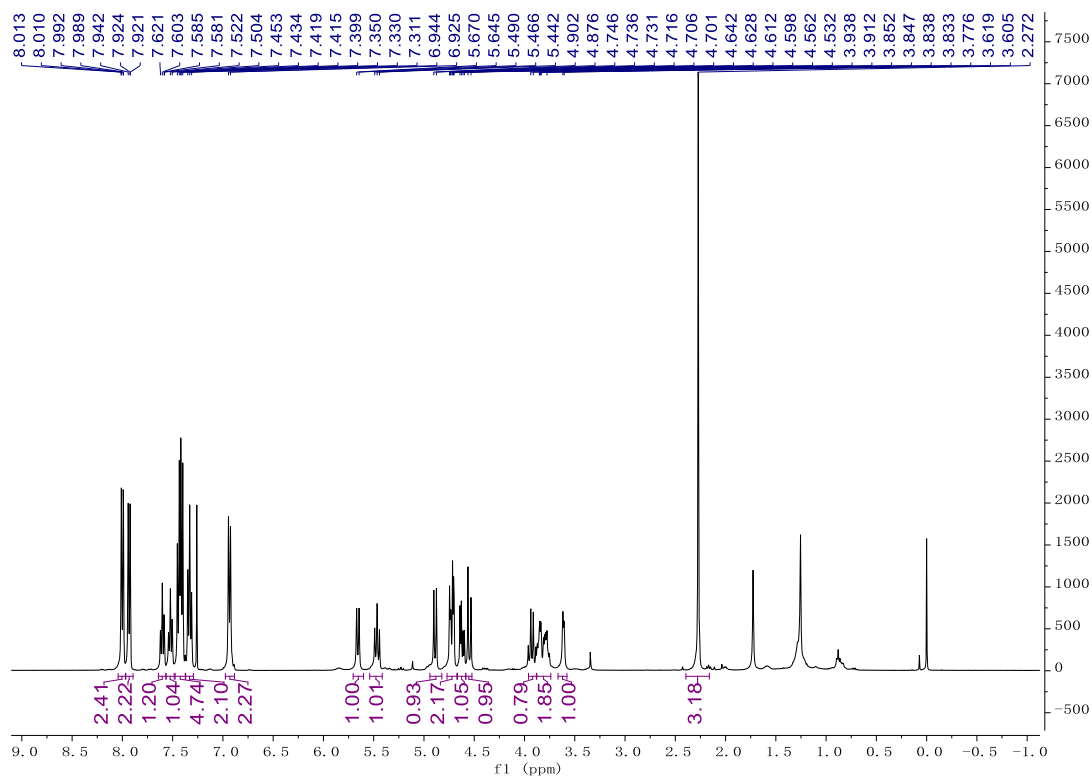

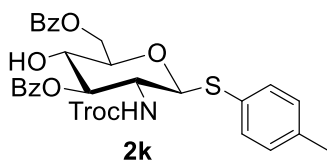

gCOSY (CDCl<sub>3</sub>, 400 MHz) of **2k**

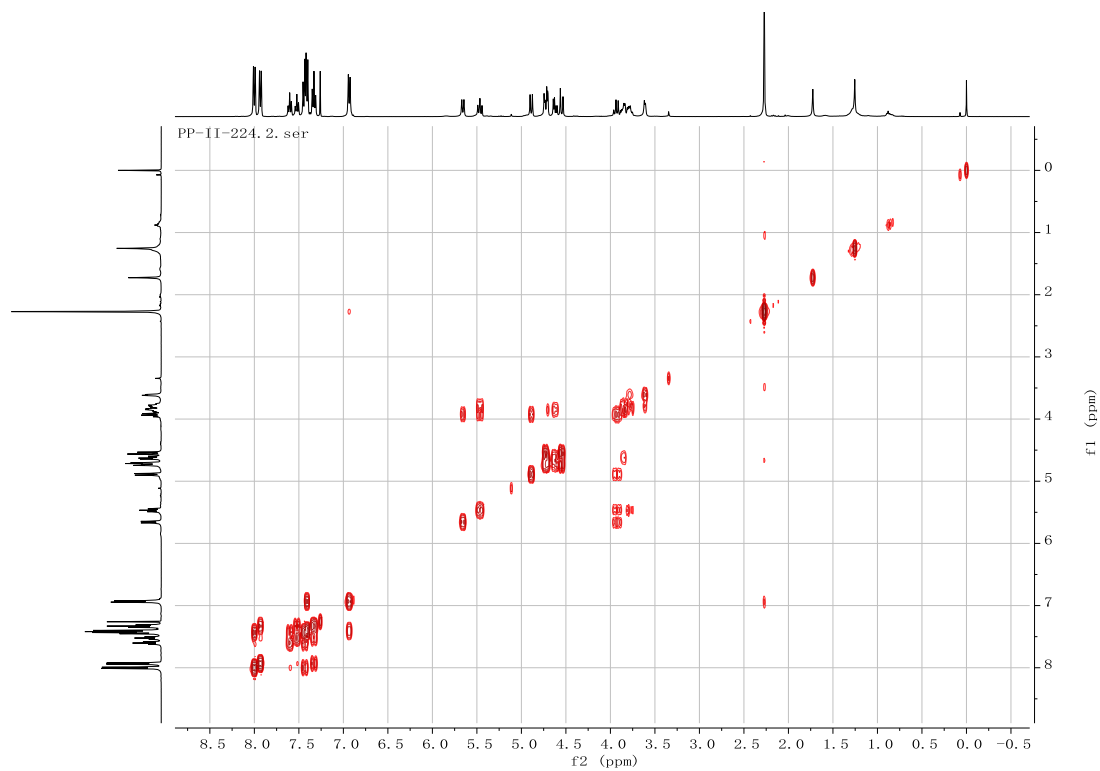

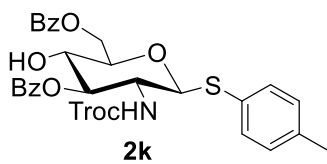

gHSQC (CDCl<sub>3</sub>, 400 MHz) of **2k**

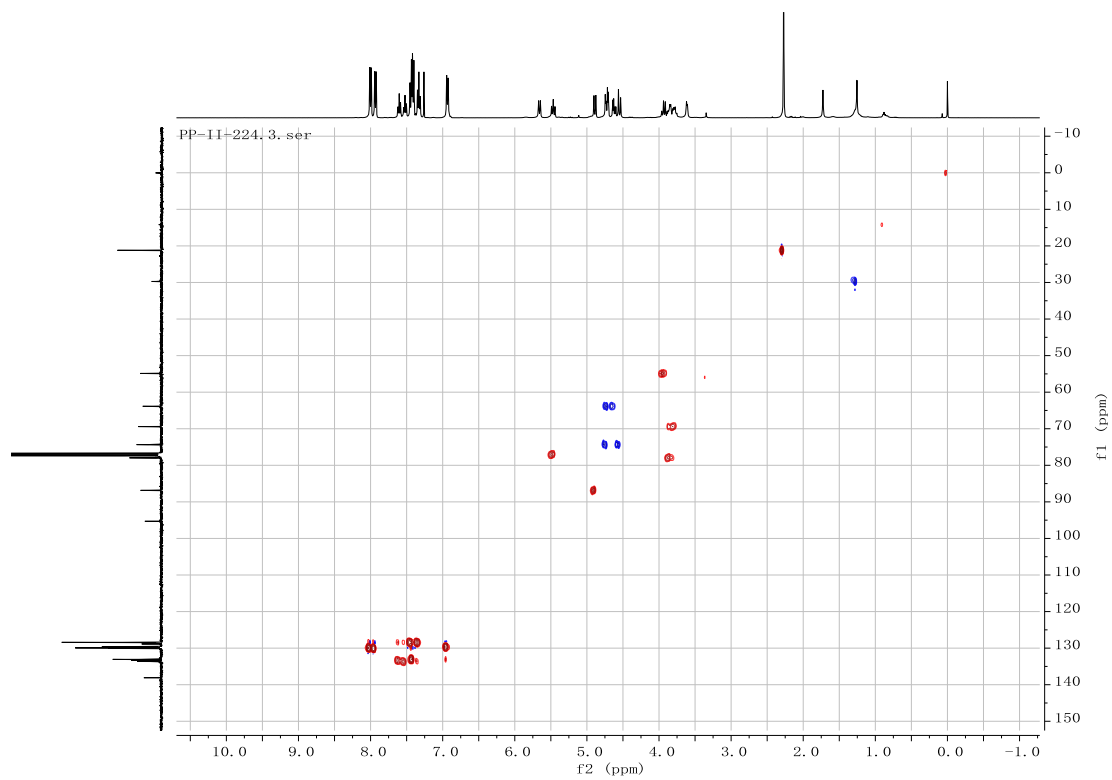



<sup>13</sup>C NMR (CDCl<sub>3</sub>, 101 MHz) of **2k**

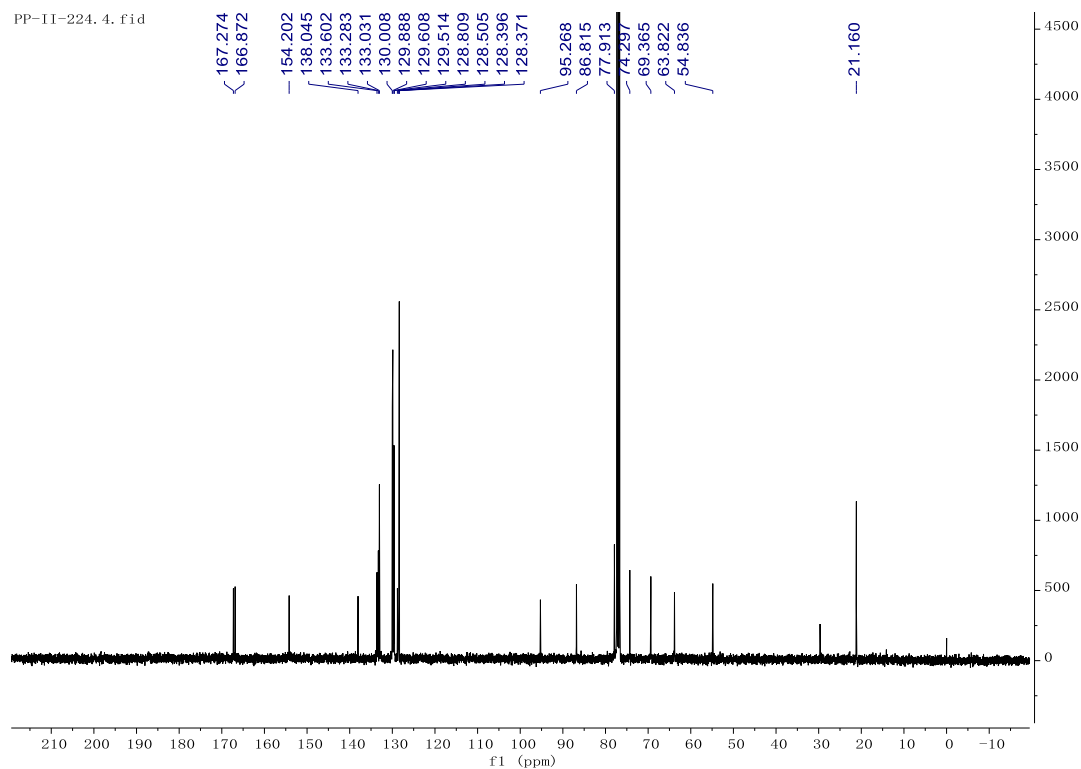



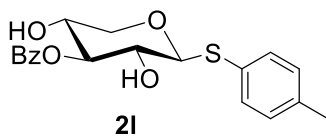

$^1\text{H NMR}$  ( $\text{CDCl}_3$ , 400 MHz) of **21**

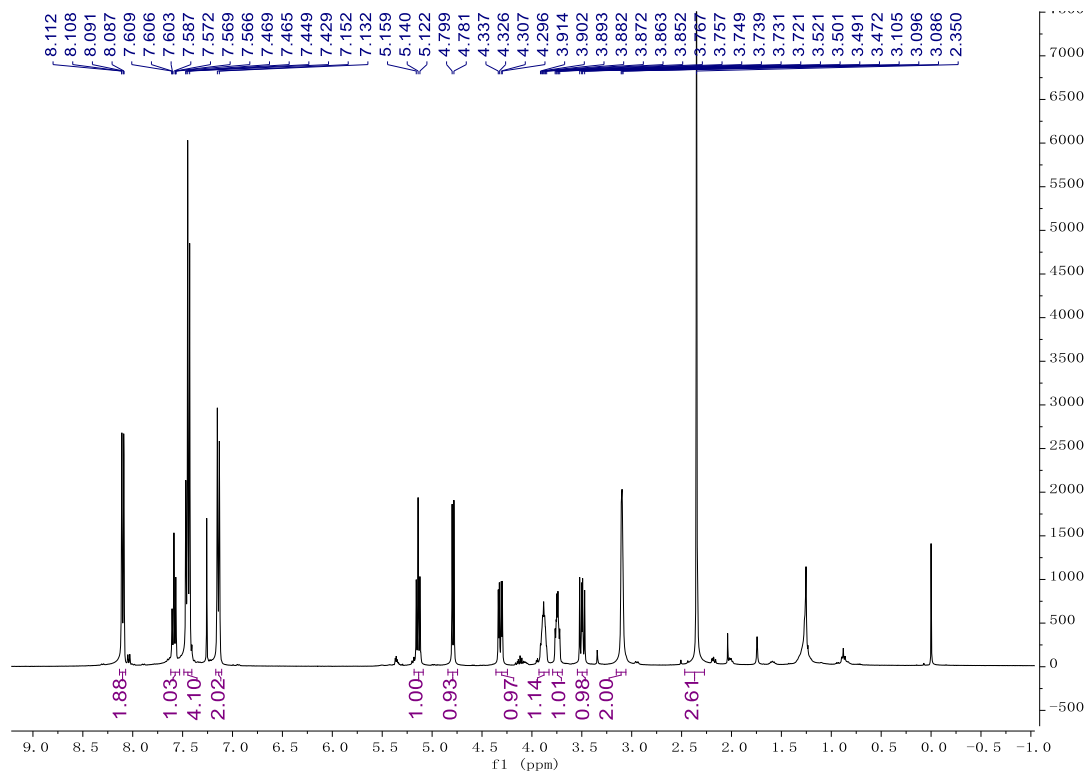

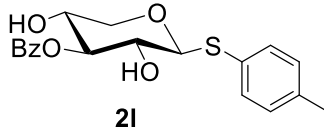

gCOSY (CDCl<sub>3</sub>, 400 MHz) of **21**

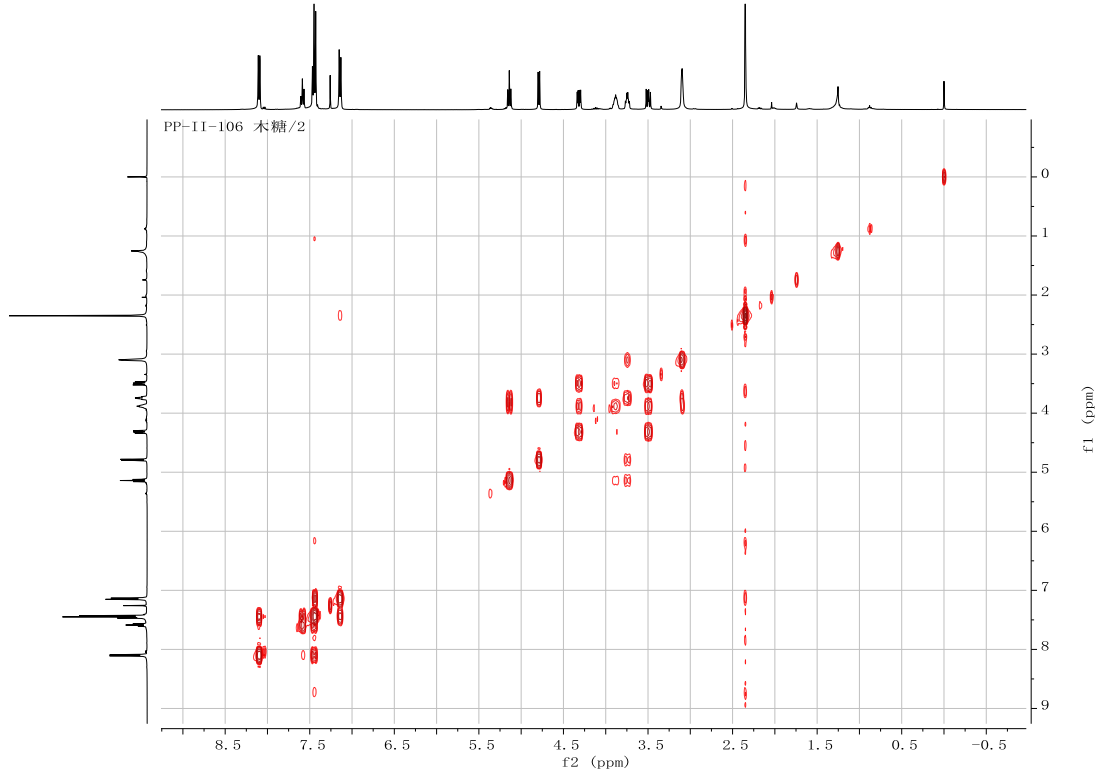

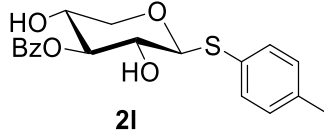

gHSQC (CDCl<sub>3</sub>, 400 MHz) of **21**

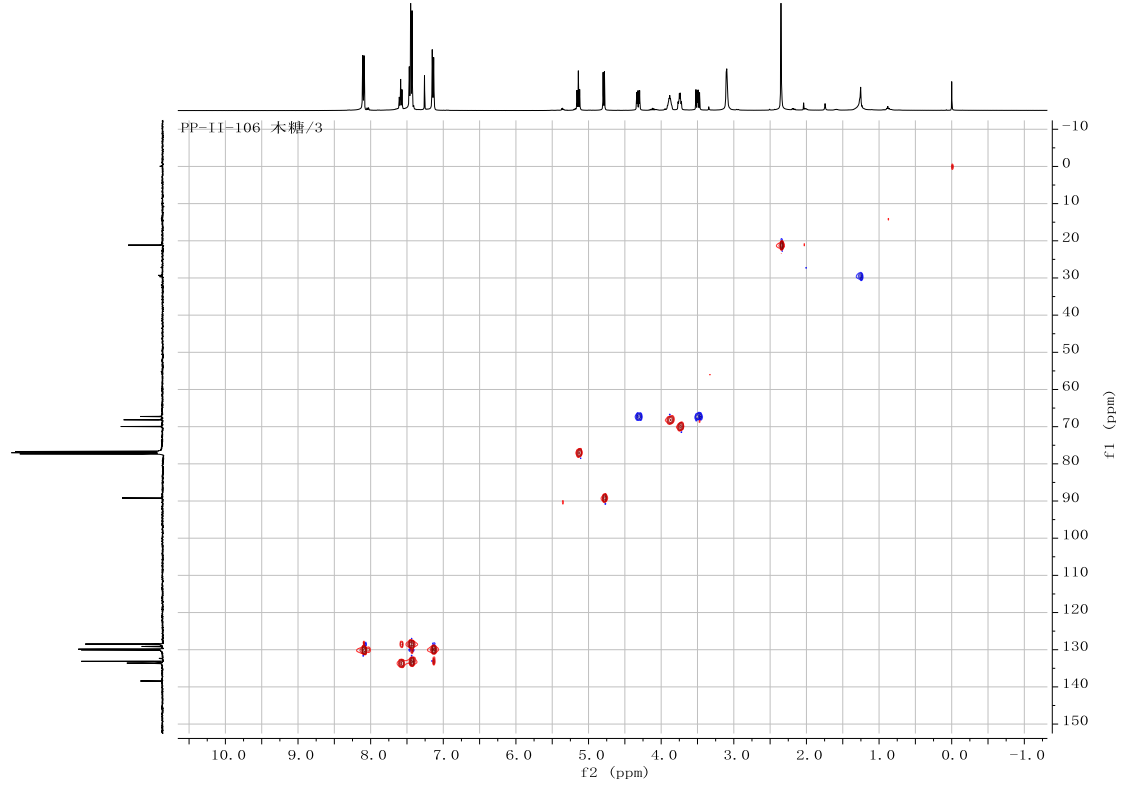



<sup>13</sup>C NMR (CDCl<sub>3</sub>, 101 MHz) of **21**

PP-11-106 木糖/4

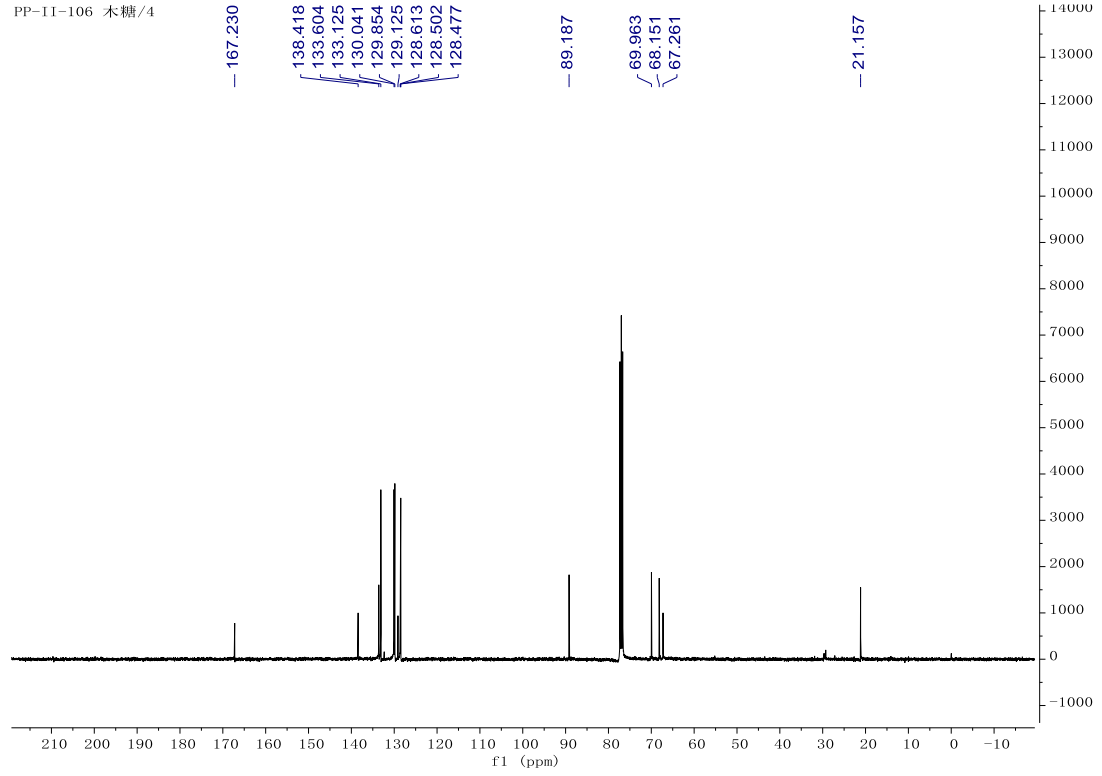

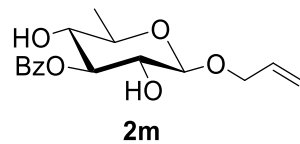

<sup>1</sup>H NMR (CDCl<sub>3</sub>, 400 MHz) of **2m**

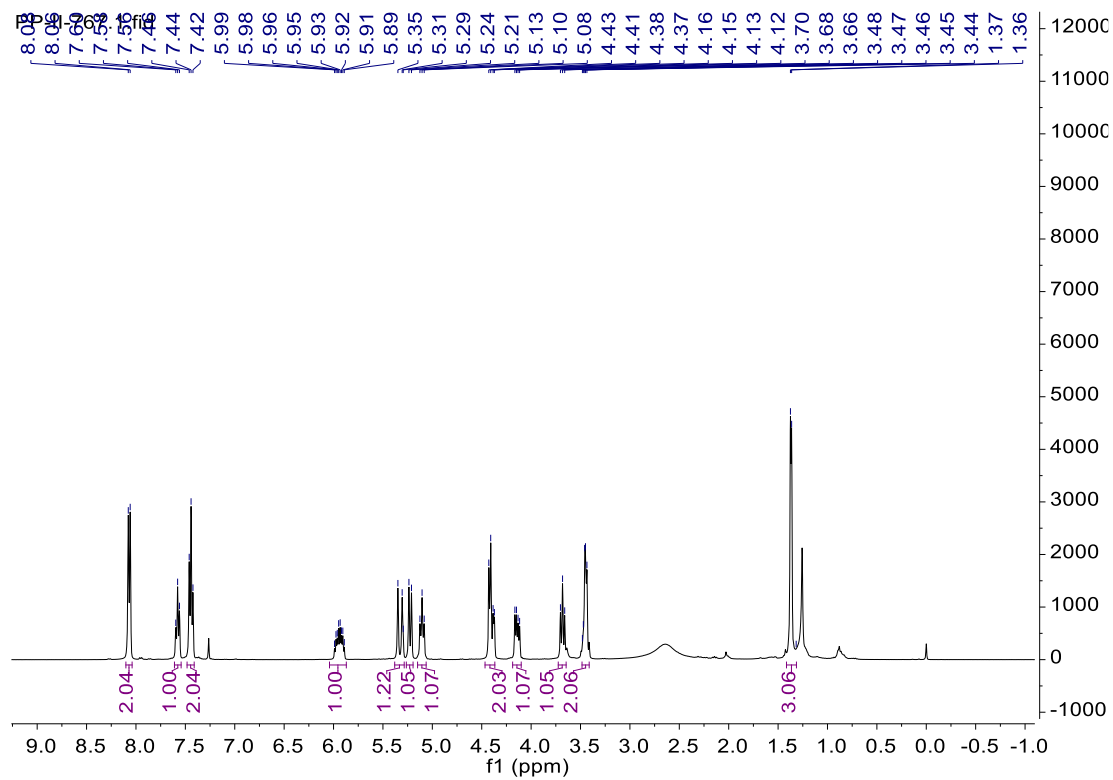



gCOSY (CDCl<sub>3</sub>, 400 MHz) of **2m**

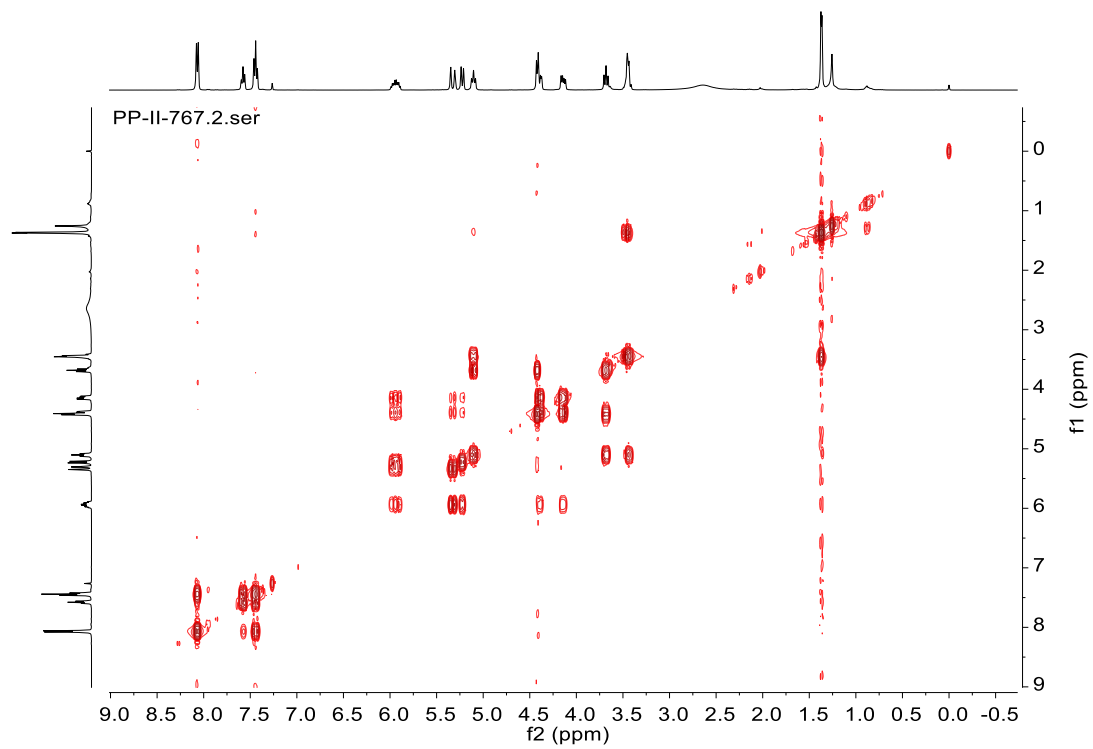

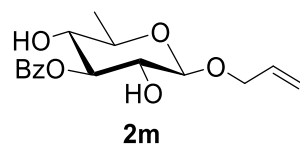

gHSQC (CDCl<sub>3</sub>, 400 MHz) of **2m**

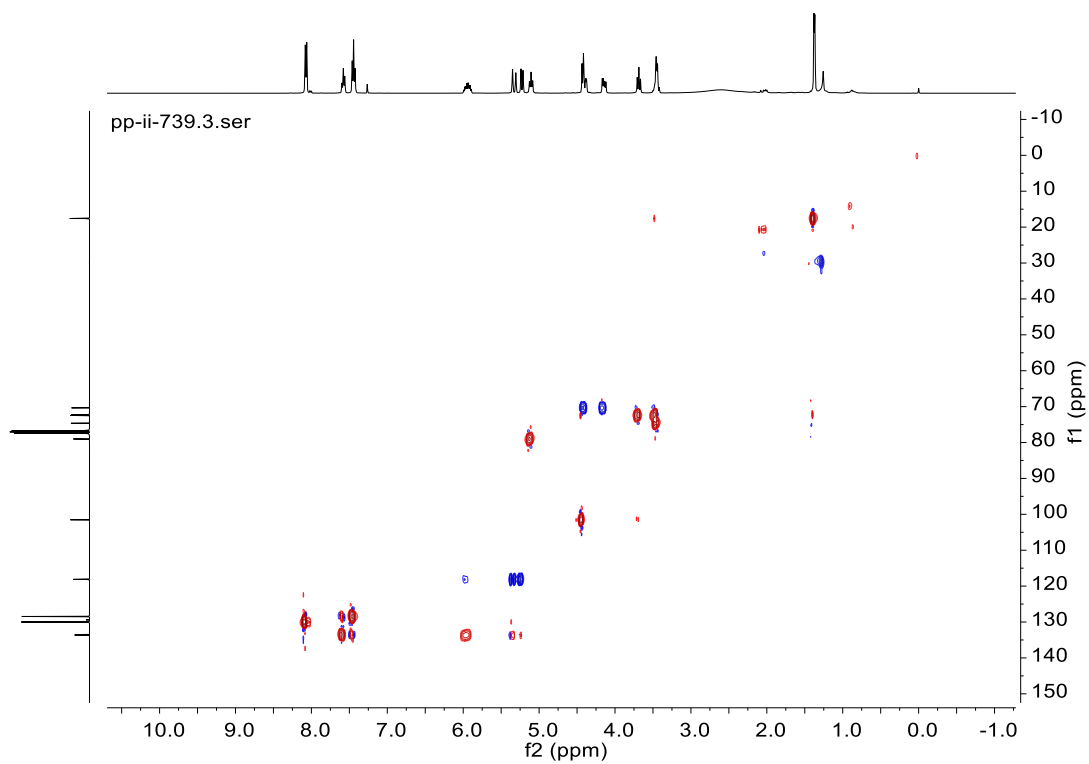



<sup>13</sup>C NMR (CDCl<sub>3</sub>, 101 MHz) of **2m**

pp-ii-739.4.fid

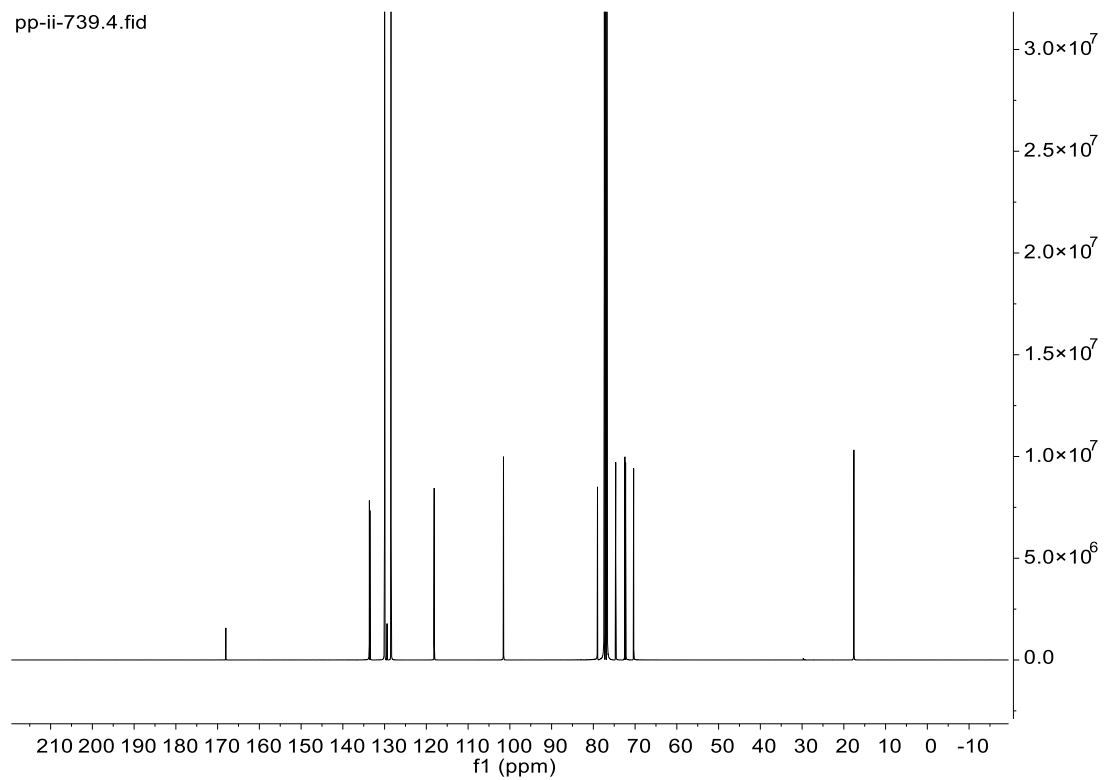



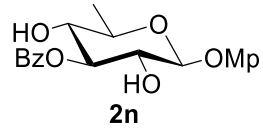

$^1\text{H NMR}$  ( $\text{CDCl}_3$ , 400 MHz) of **2n**

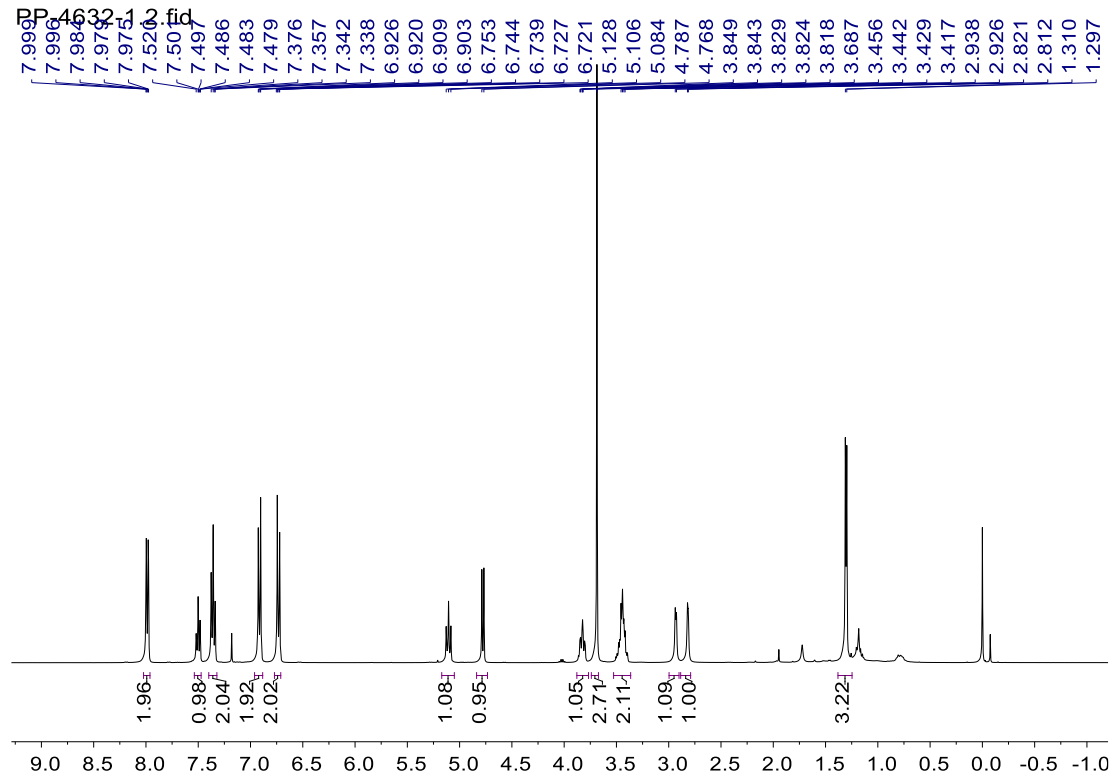

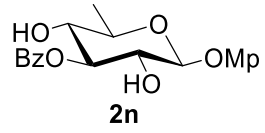

gCOSY (CDCl<sub>3</sub>, 400 MHz) of **2n**

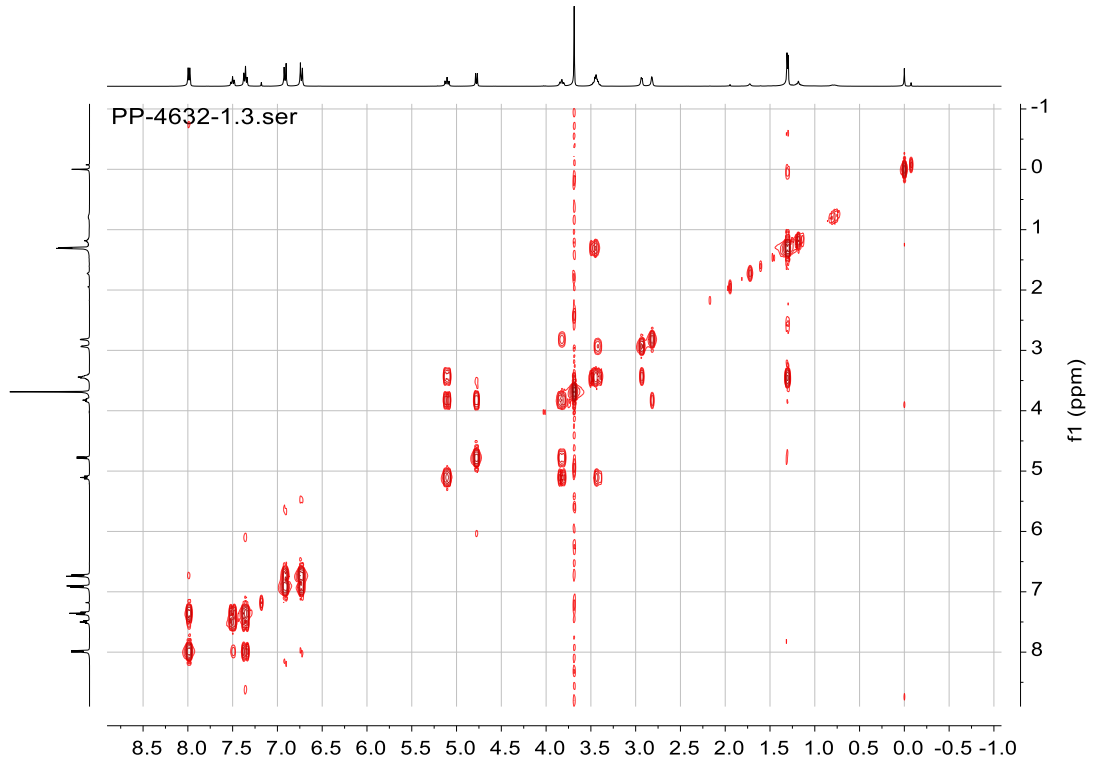



gHSQC (CDCl<sub>3</sub>, 400 MHz) of **2n**

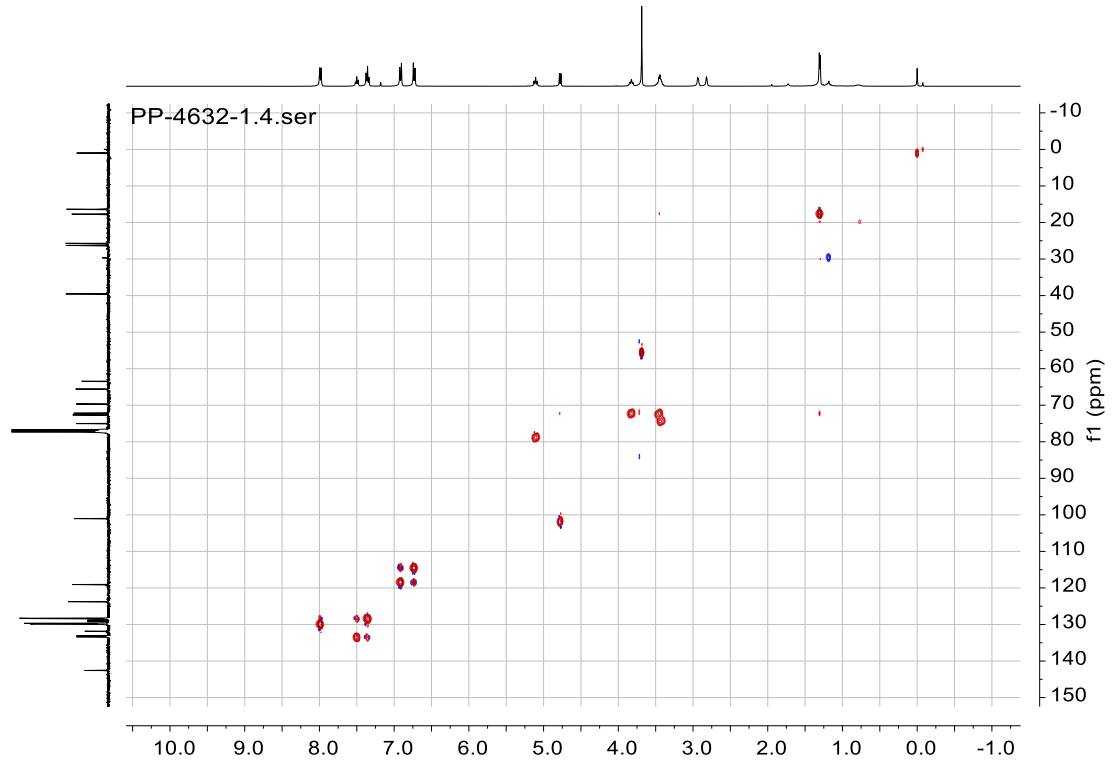

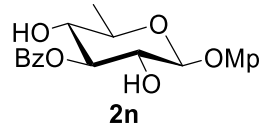

$^{13}\text{C}$  NMR ( $\text{CDCl}_3$ , 101 MHz) of **2n**

PP-4632-1.5.fid

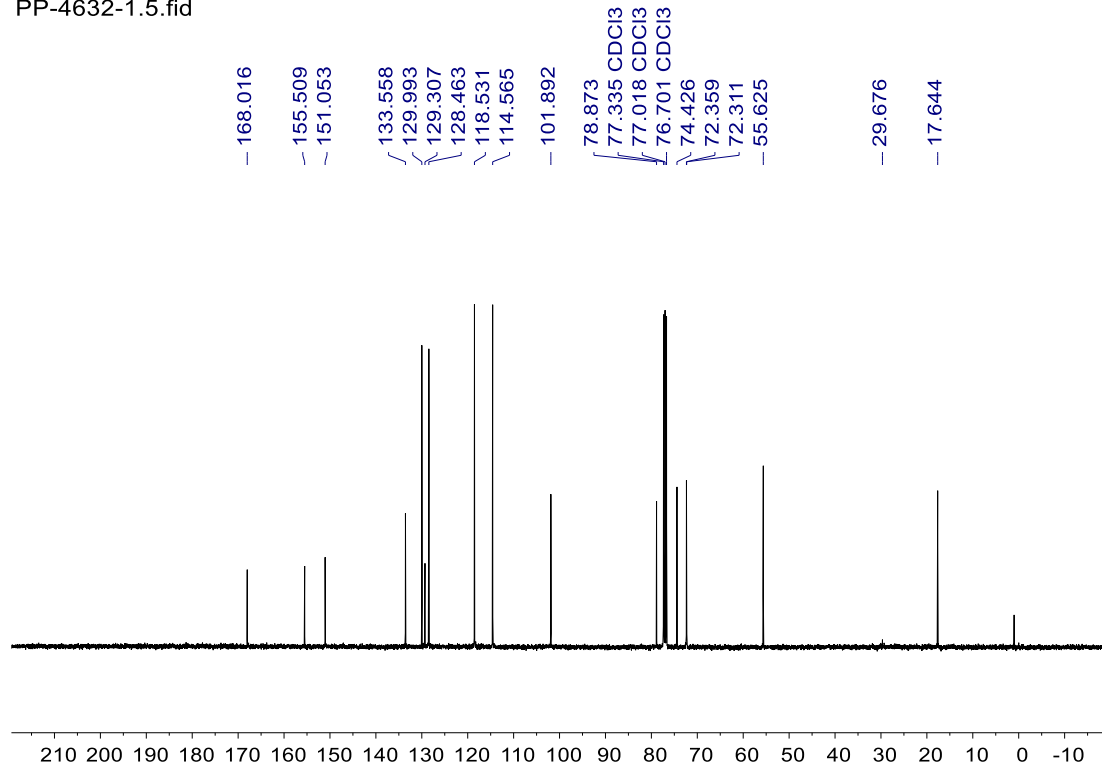

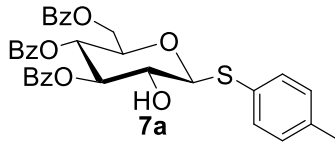

$^1\text{H NMR}$  ( $\text{CDCl}_3$ , 400 MHz) of **7a**

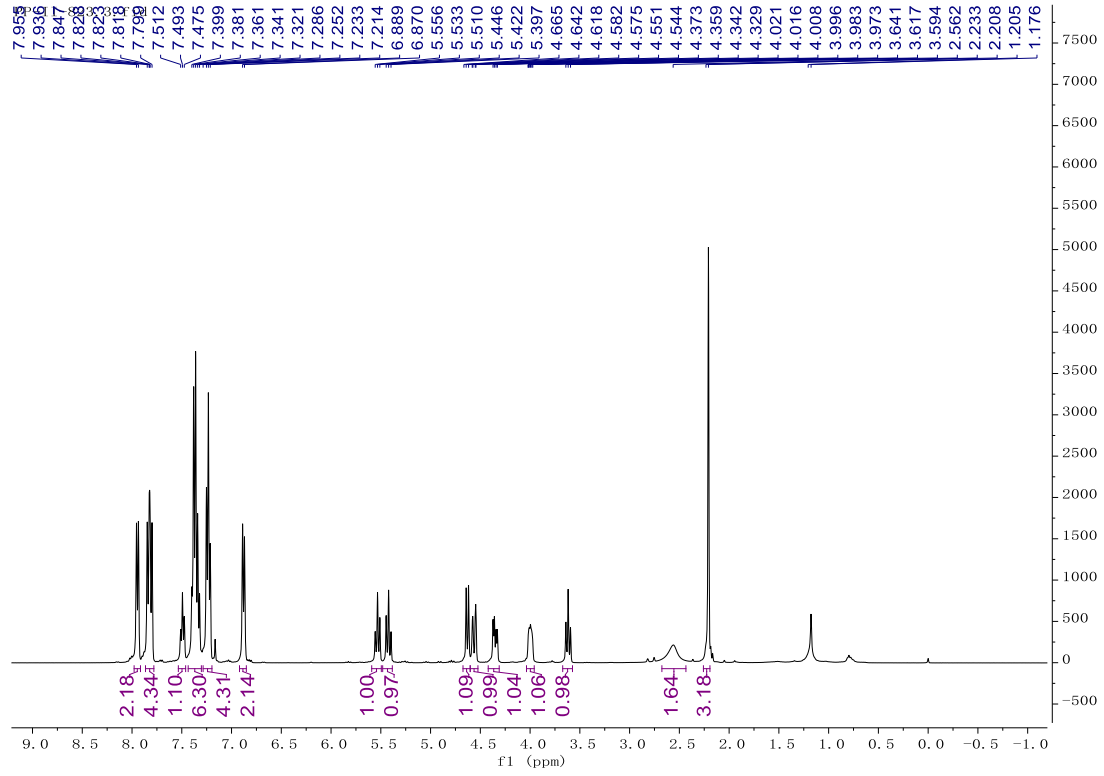

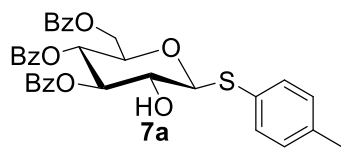

gCOSY (CDCl<sub>3</sub>, 400 MHz) of 7a

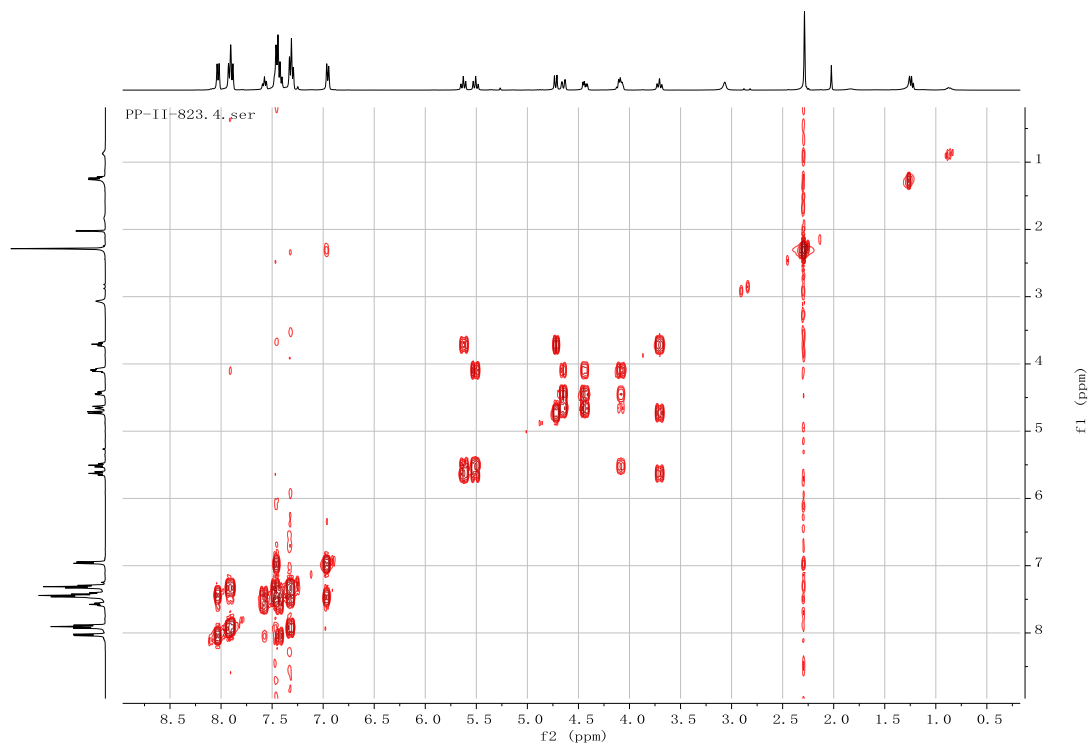

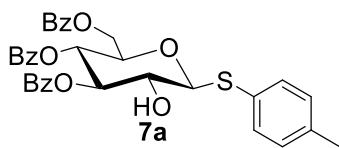

gHSQC (CDCl<sub>3</sub>, 400 MHz) of 7a

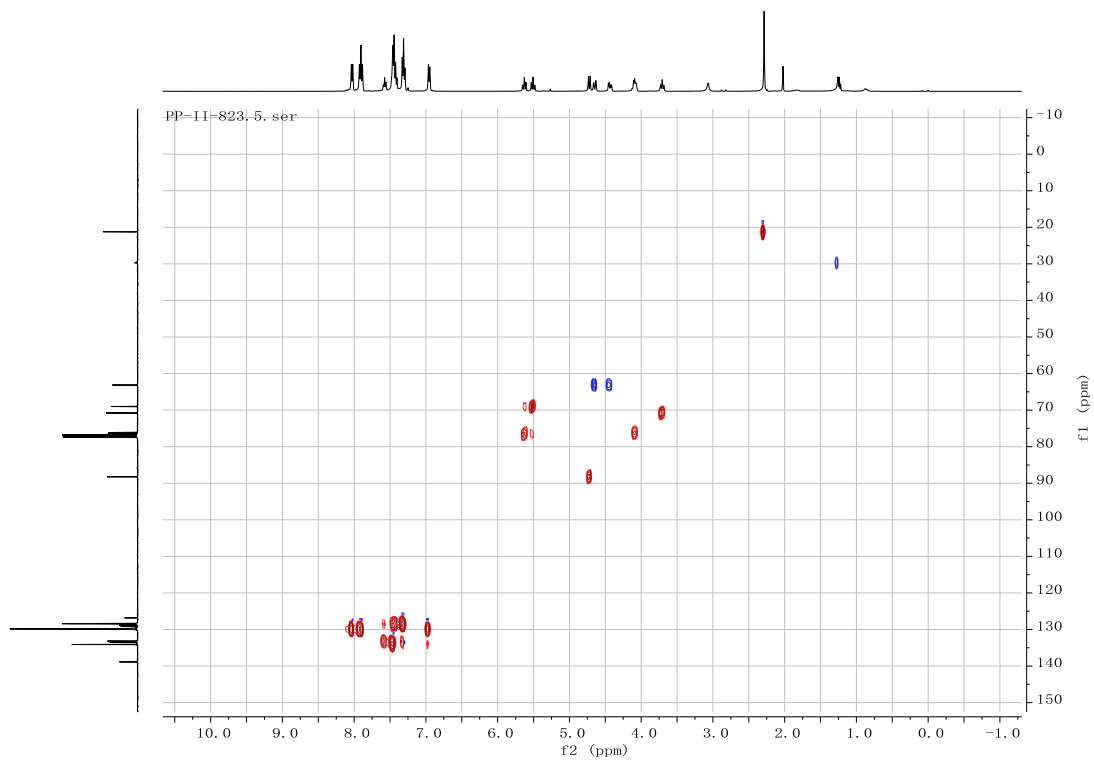



<sup>13</sup>C NMR (CDCl<sub>3</sub>, 101 MHz) of **7a**

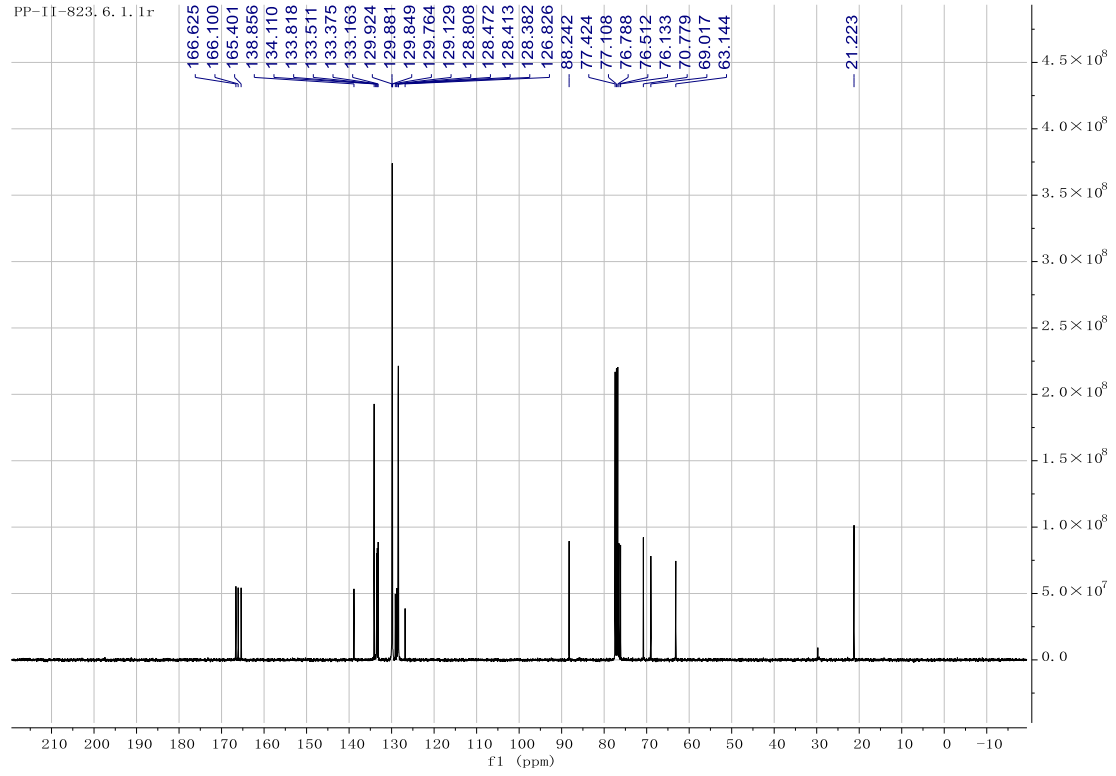



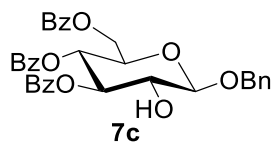

<sup>1</sup>H NMR (CDCl<sub>3</sub>, 400 MHz) of **7c**

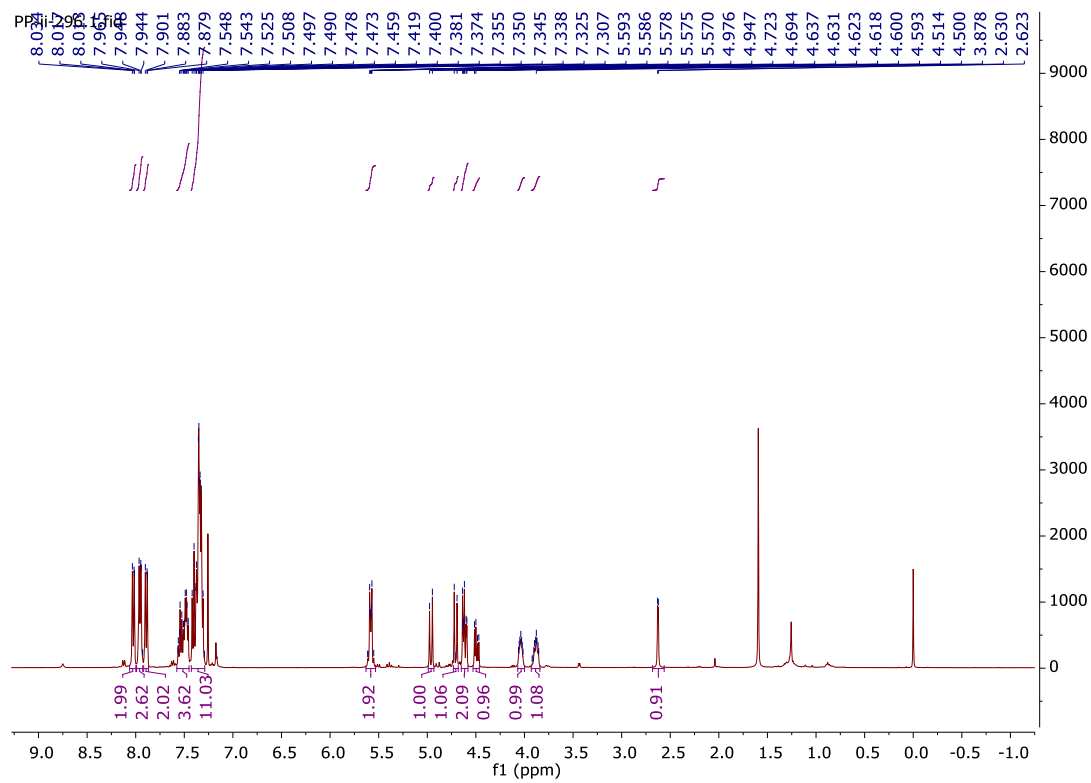

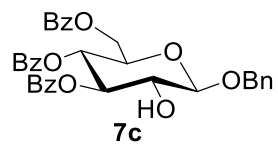

gCOSY (CDCl<sub>3</sub>, 400 MHz) of **7c**

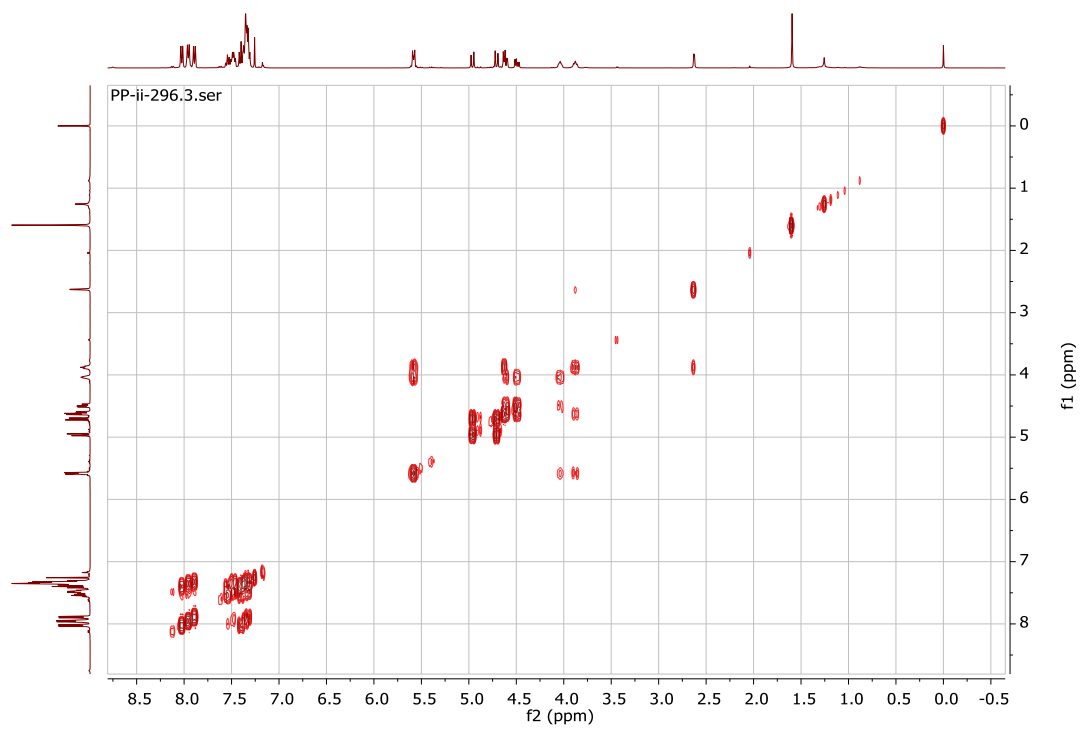

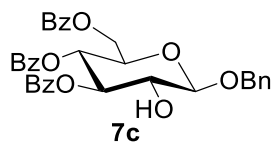

gHSQC (CDCl<sub>3</sub>, 400 MHz) of **7c**

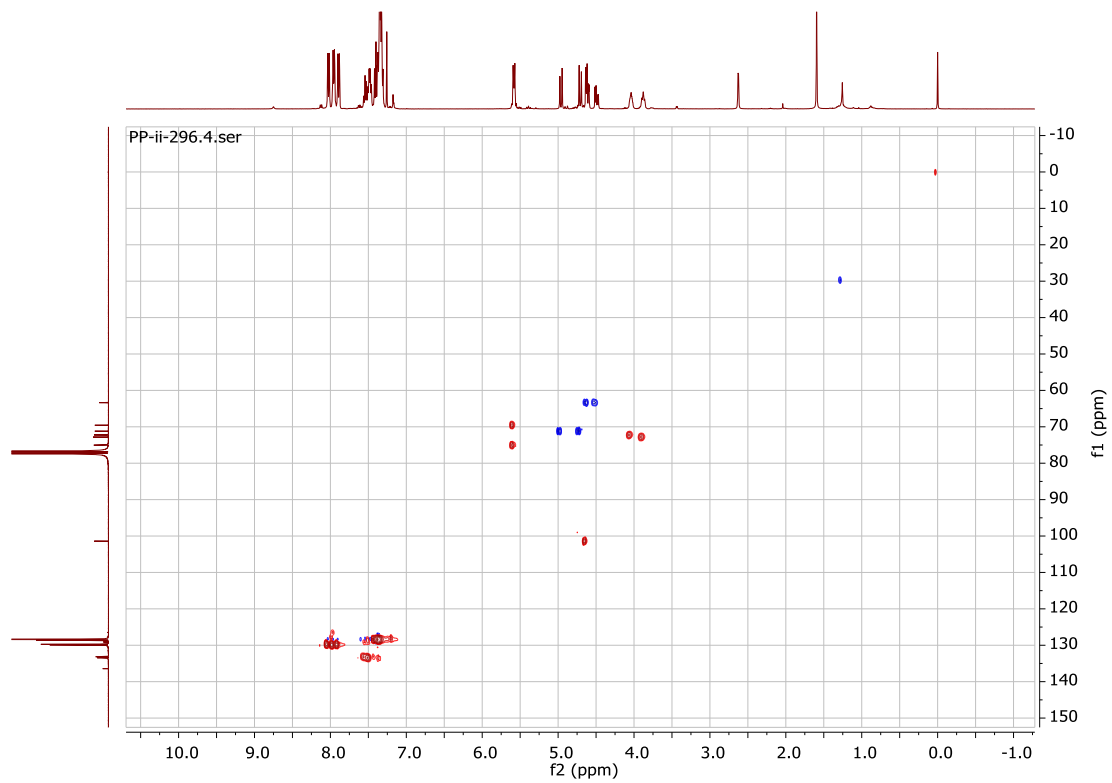



$^{13}\text{C}$  NMR ( $\text{CDCl}_3$ , 101 MHz) of **7c**

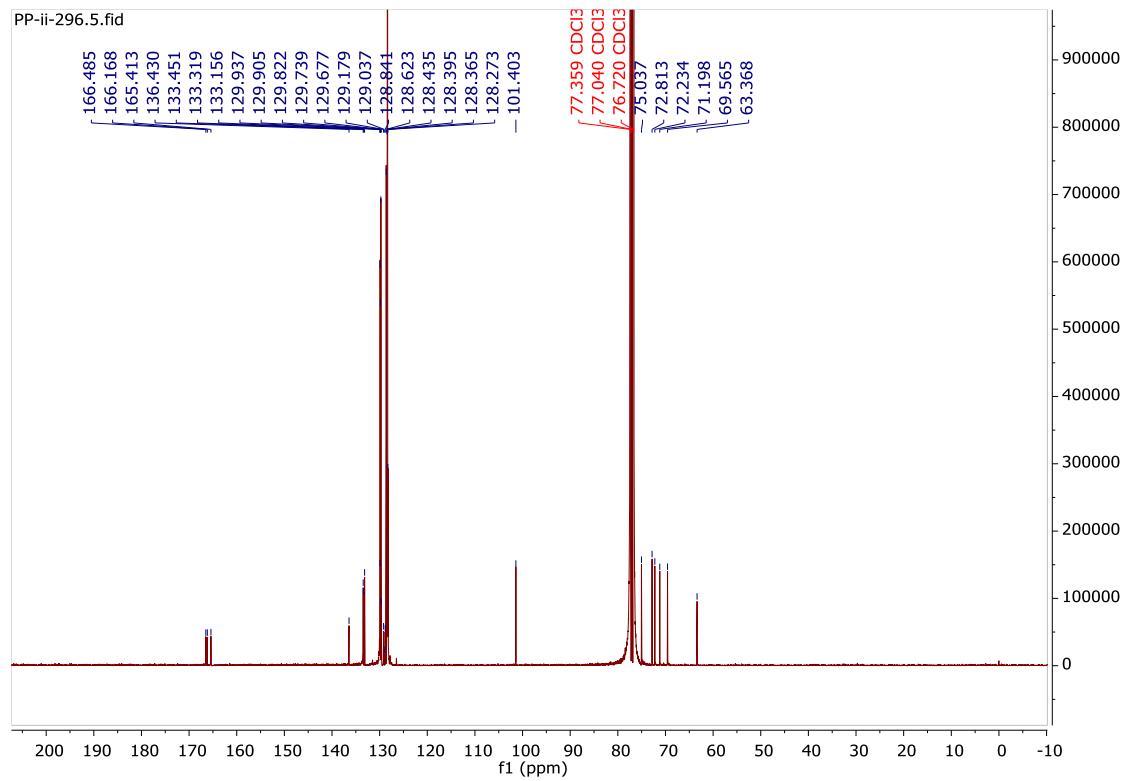

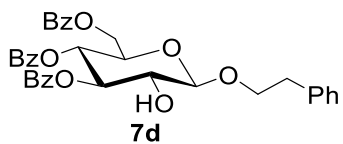

<sup>1</sup>H NMR (CDCl<sub>3</sub>, 400 MHz) of **7d**

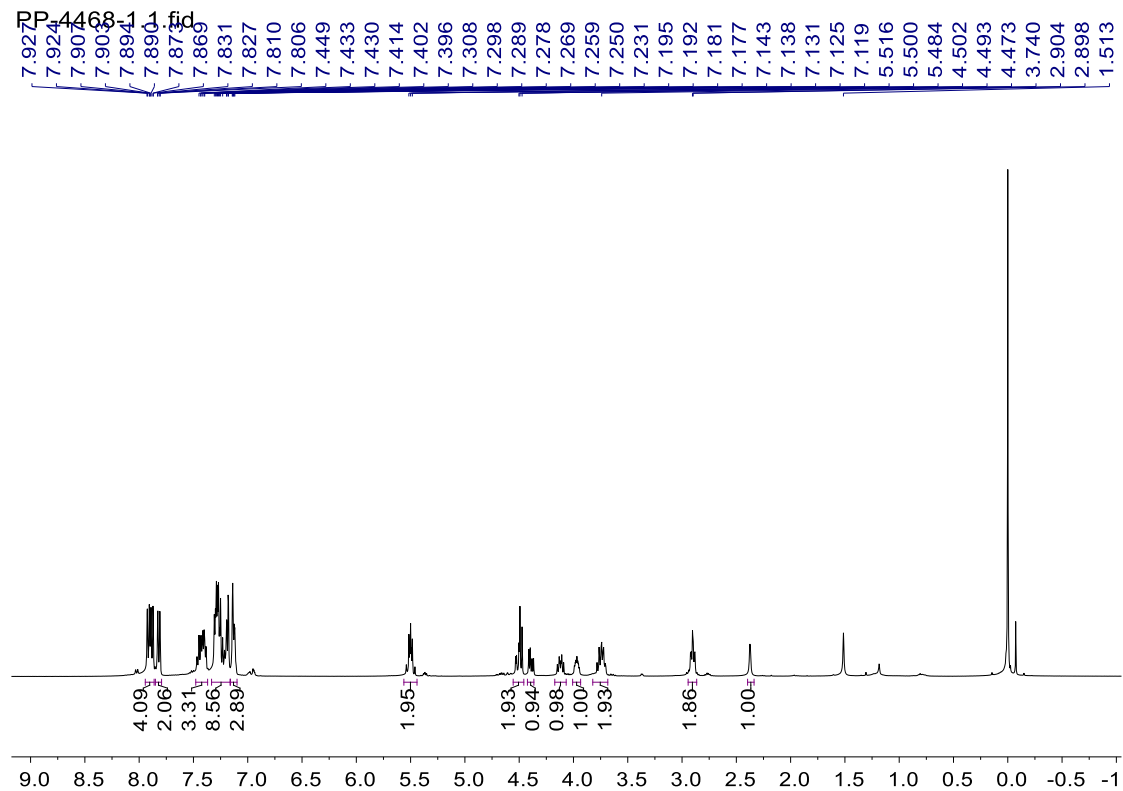

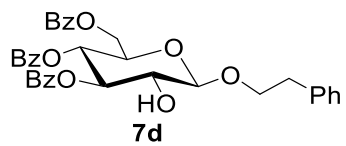

gCOSY (CDCl<sub>3</sub>, 400 MHz) of 7d

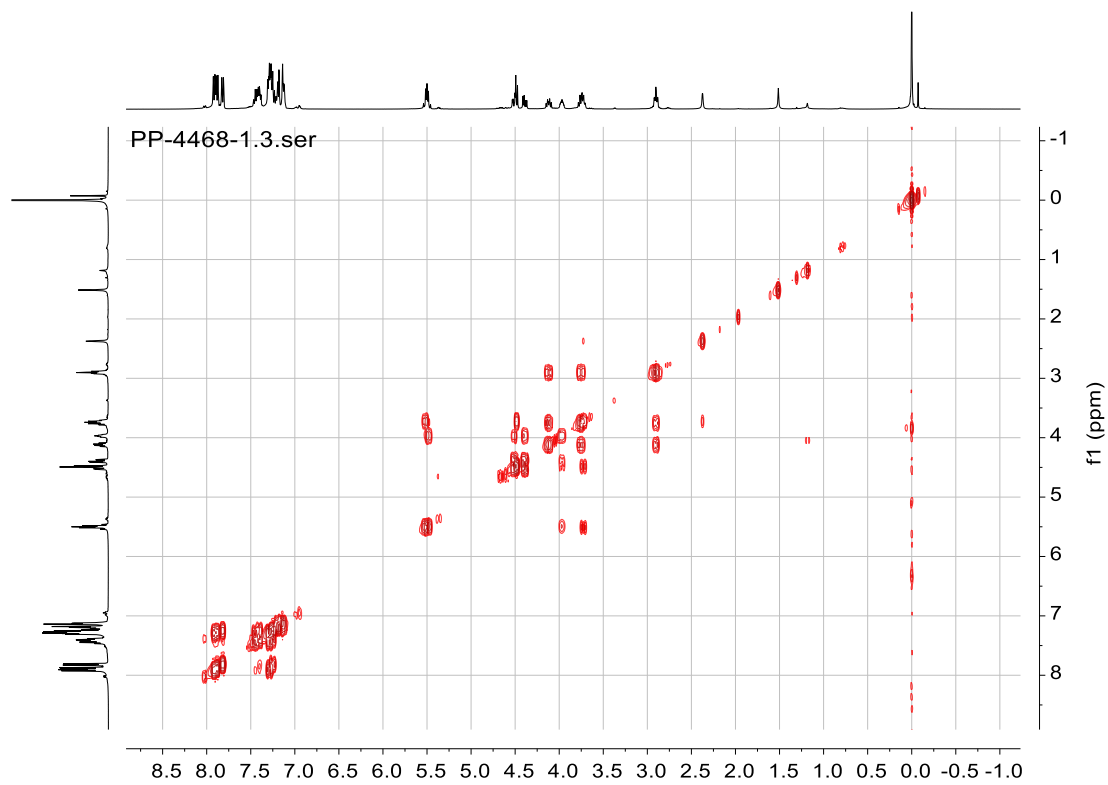

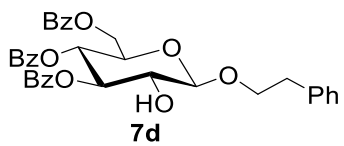

gHSQC (CDCl<sub>3</sub>, 400 MHz) of 7d

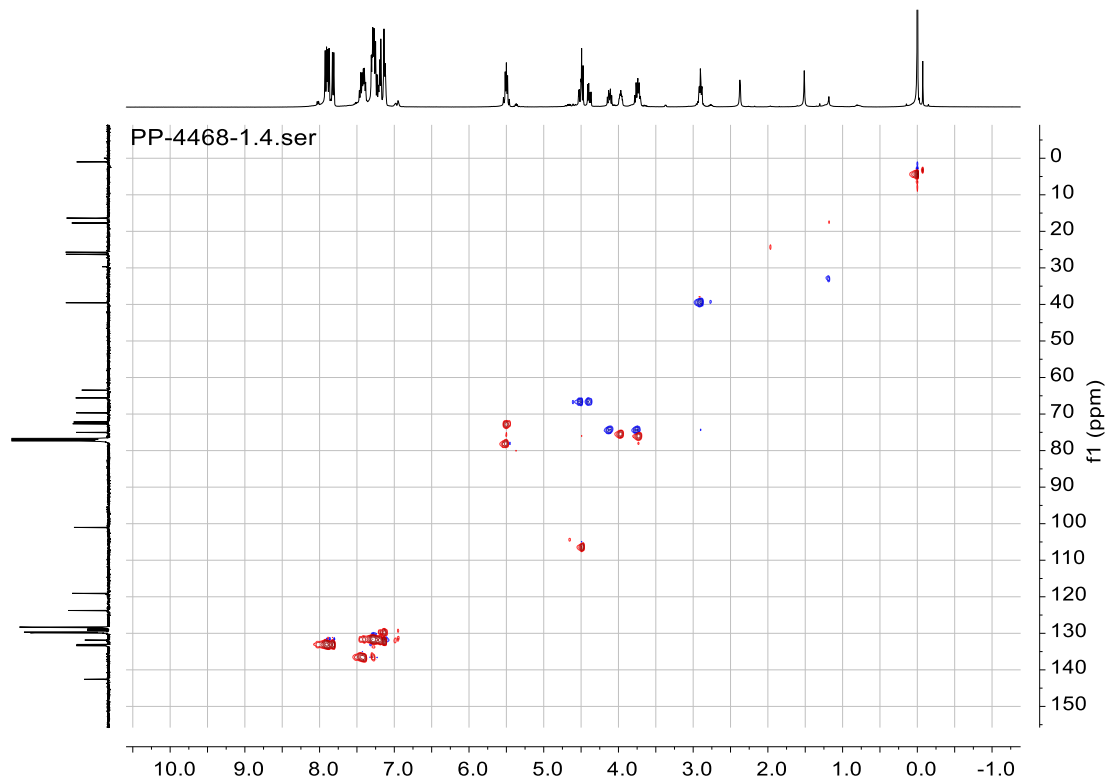



$^{13}\text{C}$  NMR ( $\text{CDCl}_3$ , 101 MHz) of **7d**

PP-4468-1.5.fid

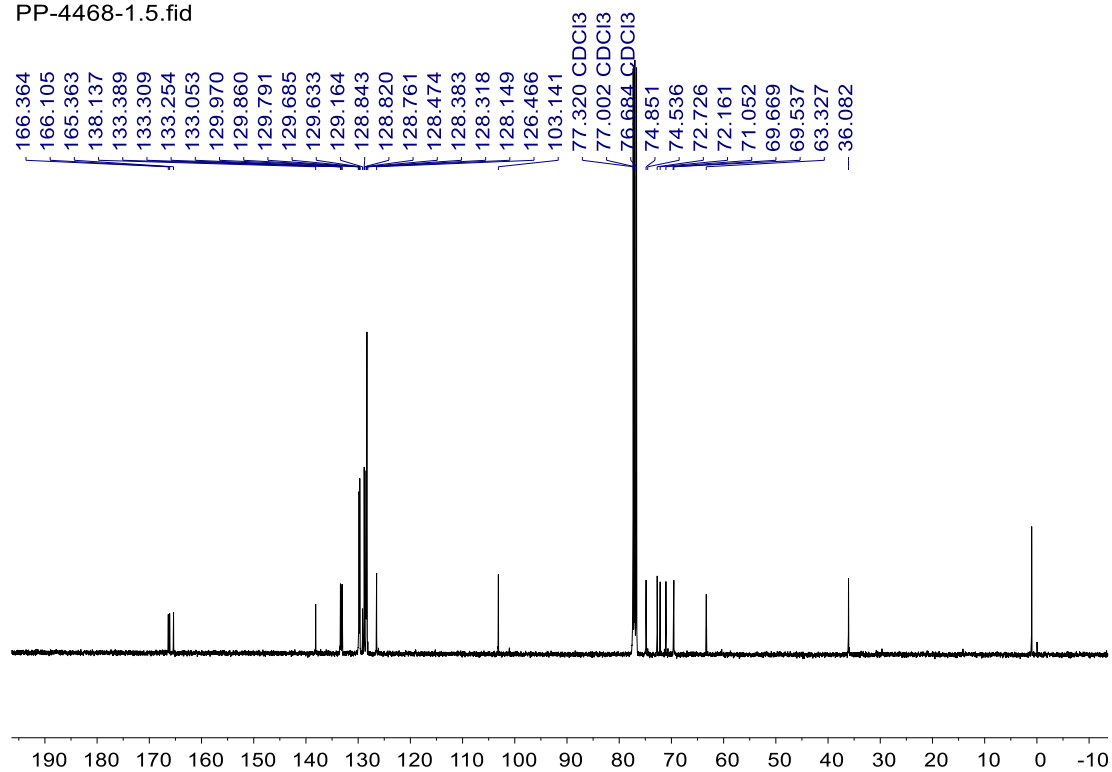



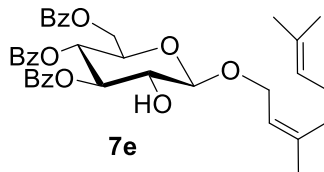

$^1\text{H NMR}$  ( $\text{CDCl}_3$ , 400 MHz) of **7e**

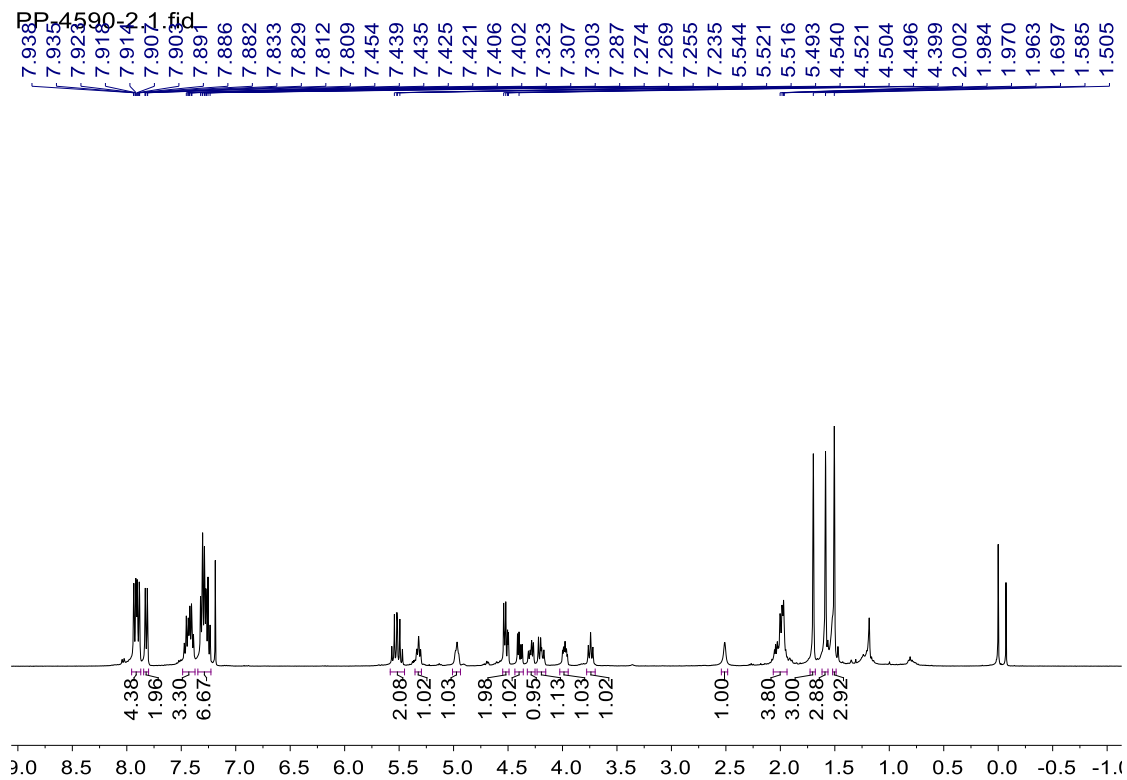

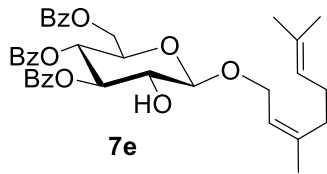

gCOSY (CDCl<sub>3</sub>, 400 MHz) of 7e

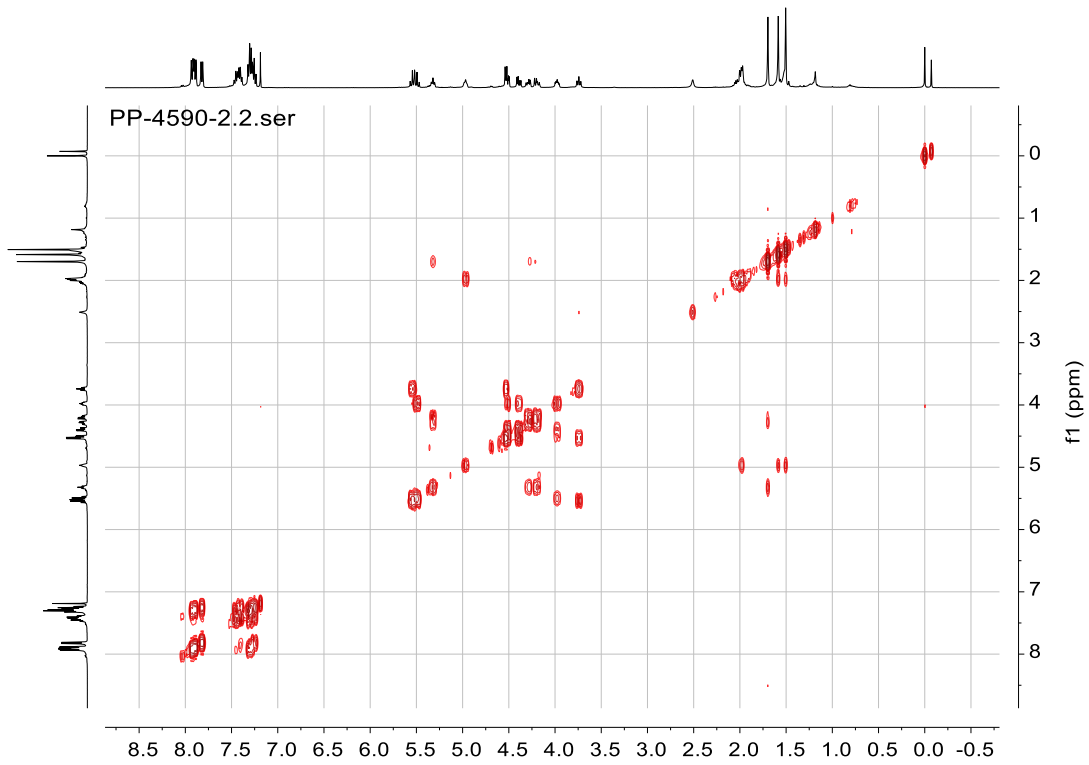

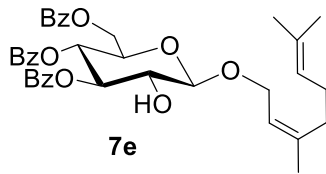

gHSQC (CDCl<sub>3</sub>, 400 MHz) of 7e

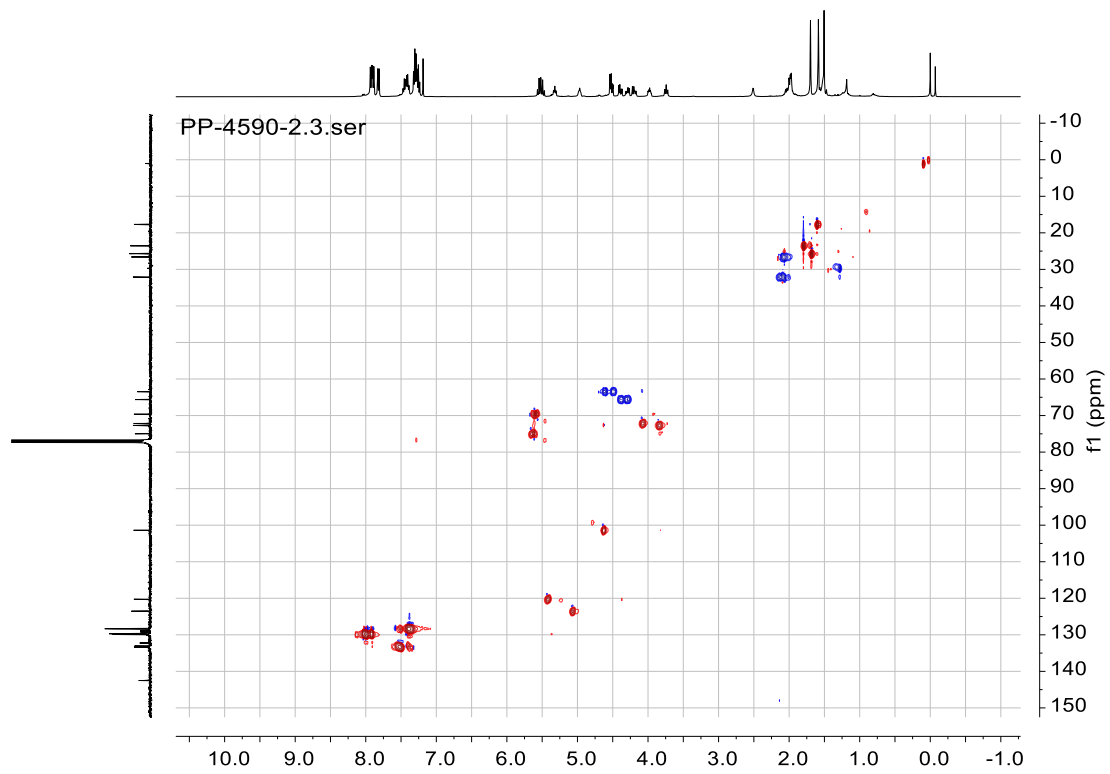



$^{13}\text{C}$  NMR ( $\text{CDCl}_3$ , 101 MHz) of **7e**

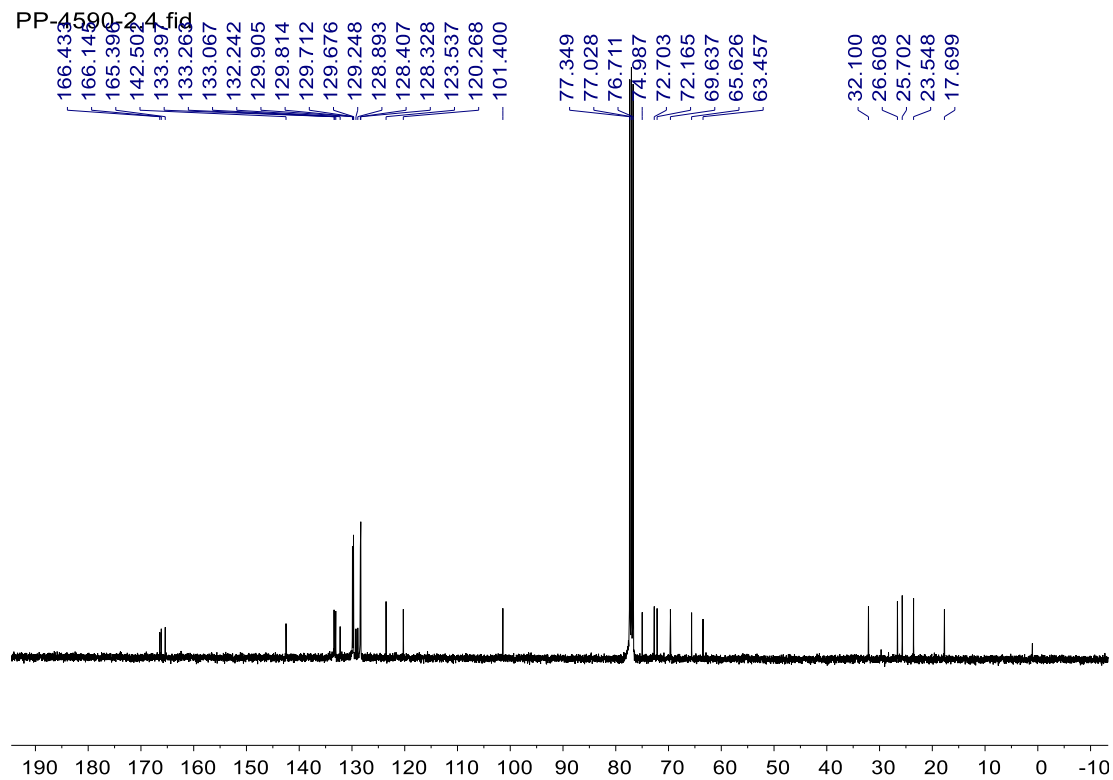

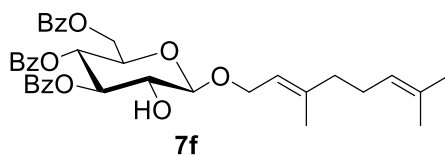

$^1\text{H NMR}$  ( $\text{CDCl}_3$ , 400 MHz) of **7f**

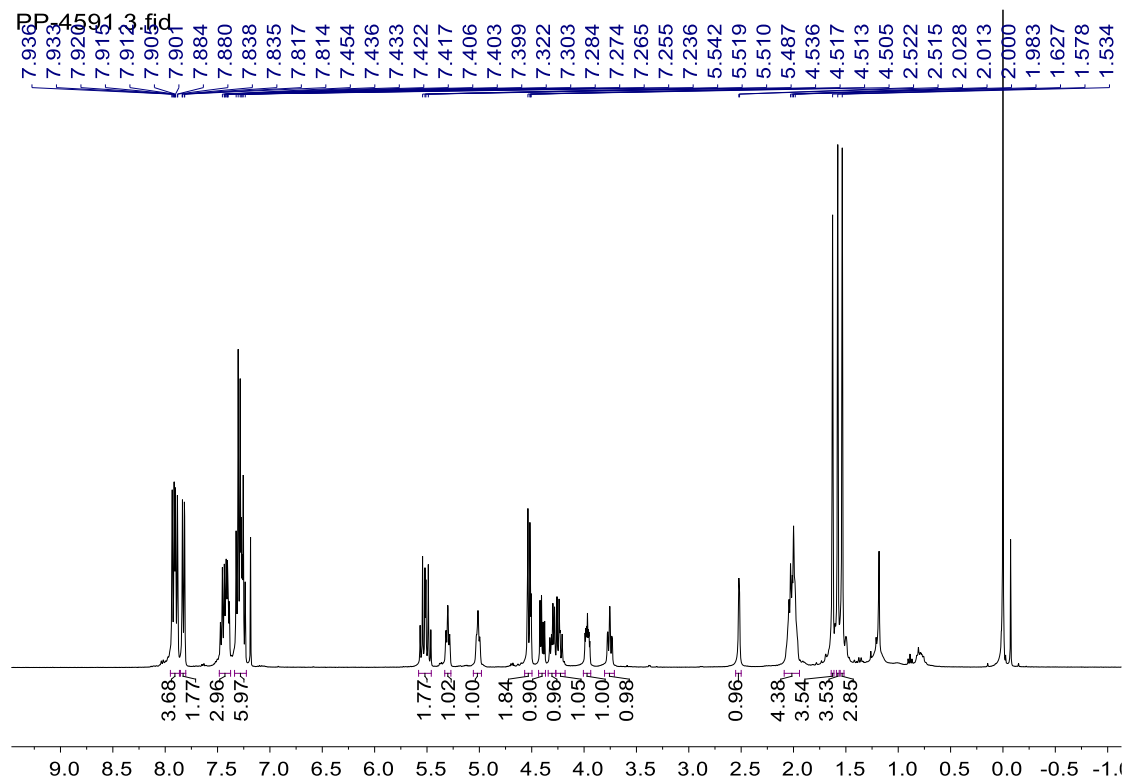

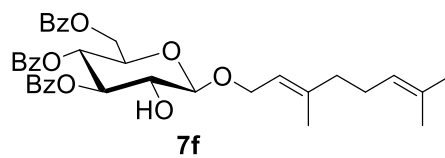

gCOSY (CDCl<sub>3</sub>, 400 MHz) of 7f

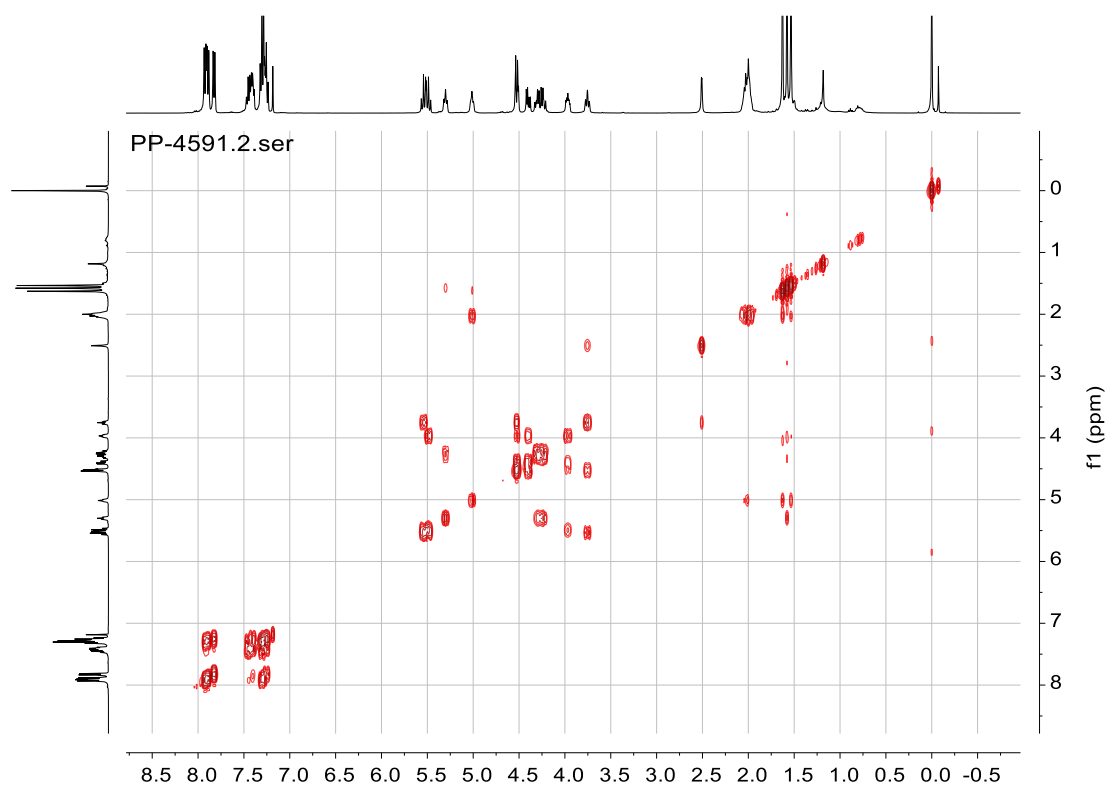



gHSQC (CDCl<sub>3</sub>, 400 MHz) of 7f

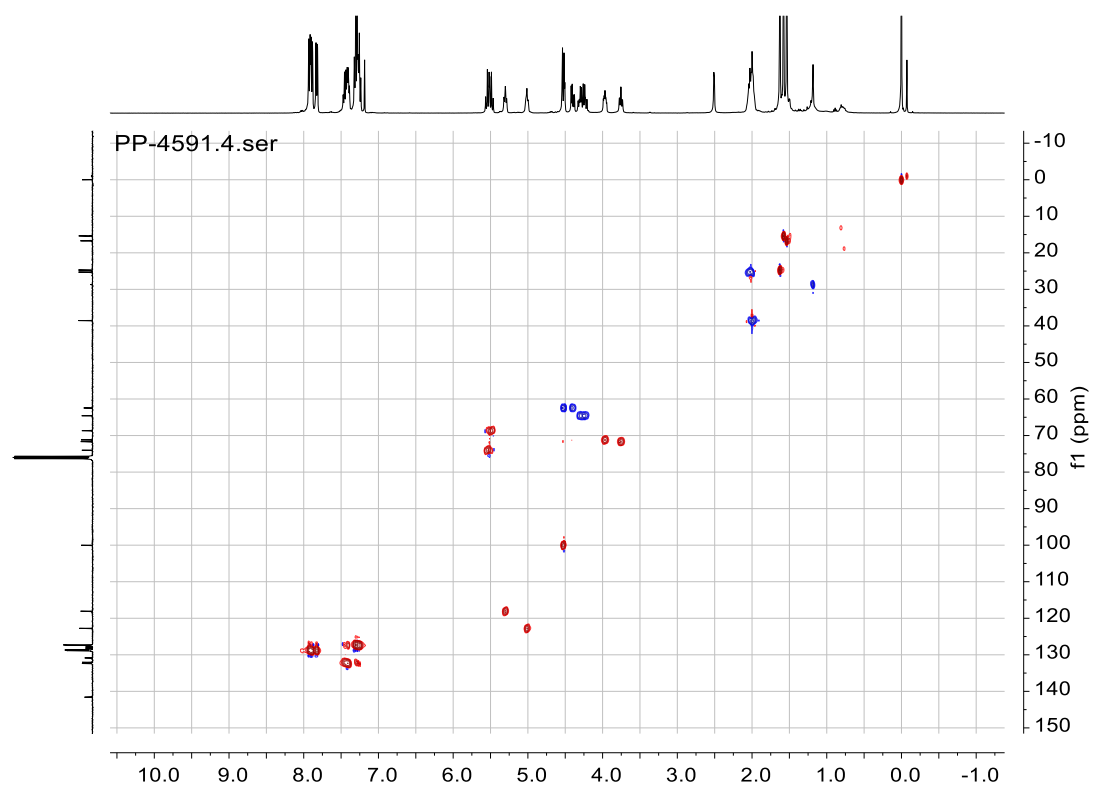



<sup>13</sup>C NMR (CDCl<sub>3</sub>, 101 MHz) of **7f**

PP-4591.5.fid

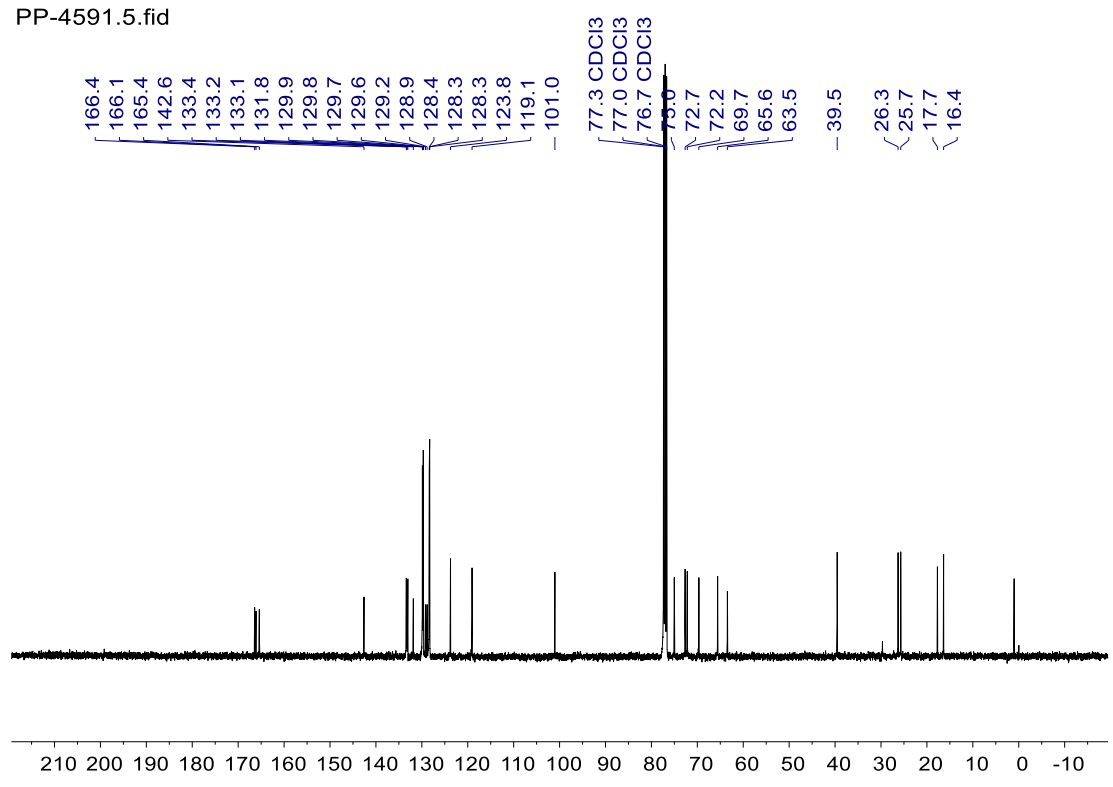



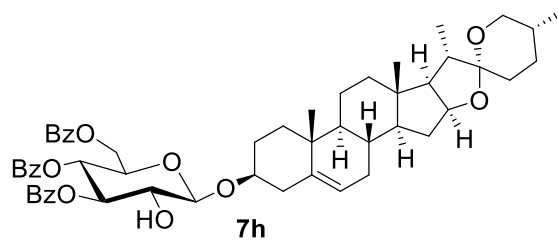

$^1\text{H NMR}$  ( $\text{CDCl}_3$ , 400 MHz) of **7h**

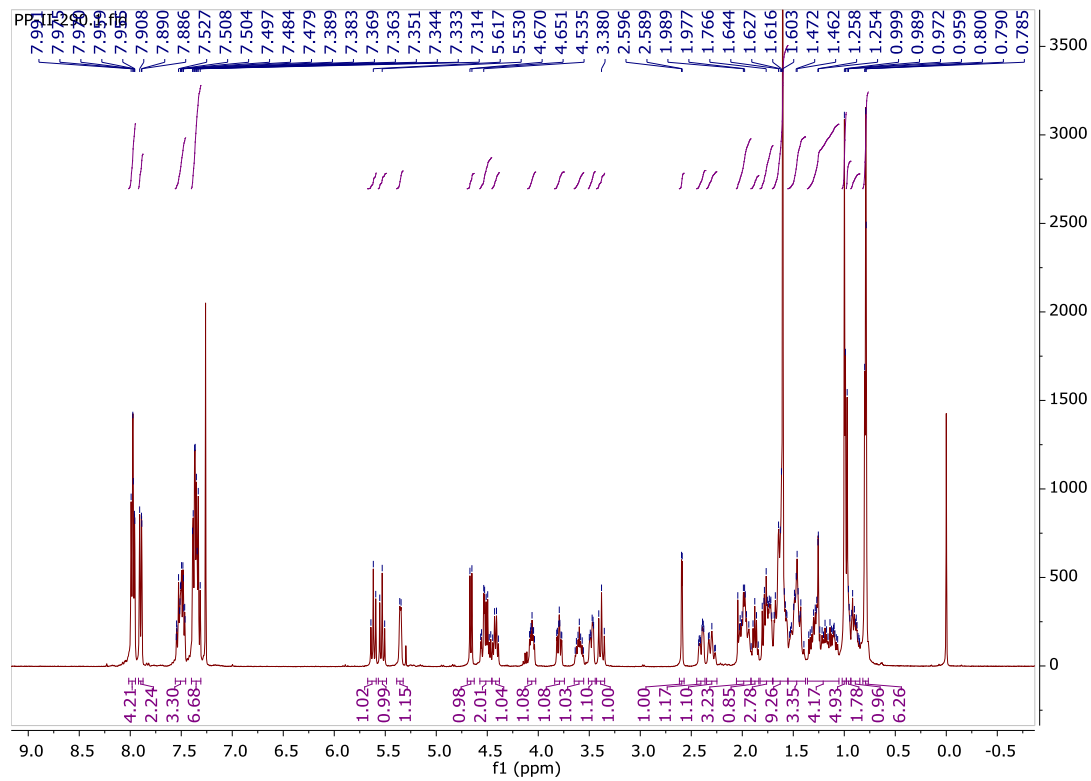

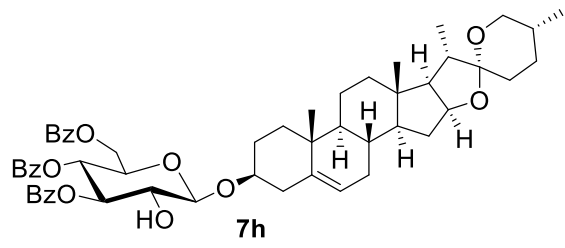

gCOSY (CDCl<sub>3</sub>, 400 MHz) of **7h**

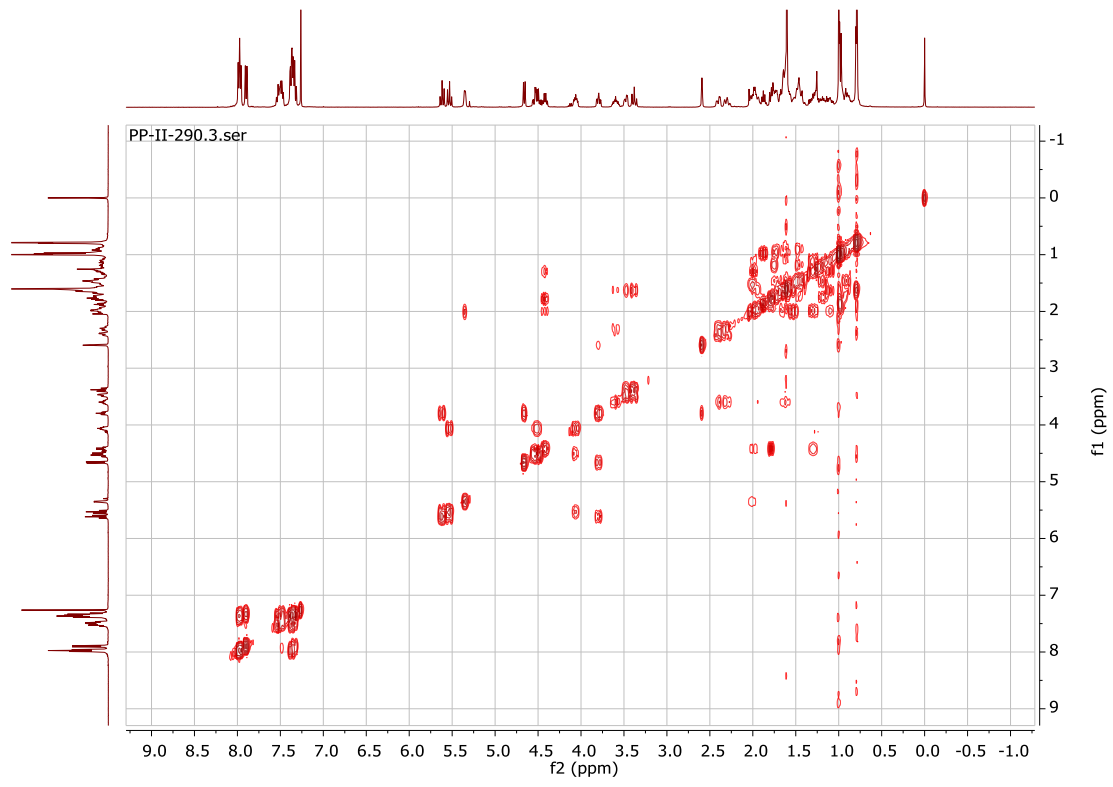



gHSQC (CDCl<sub>3</sub>, 400 MHz) of **7h**

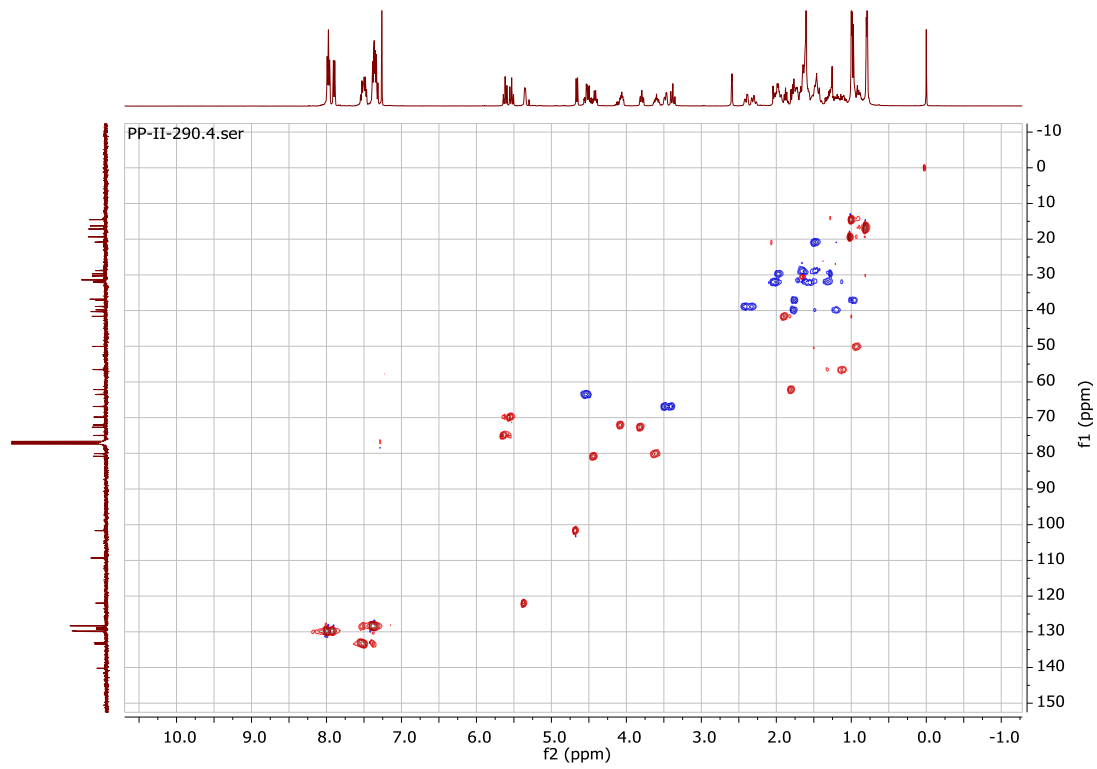



$^{13}\text{C}$  NMR ( $\text{CDCl}_3$ , 101 MHz) of **7h**

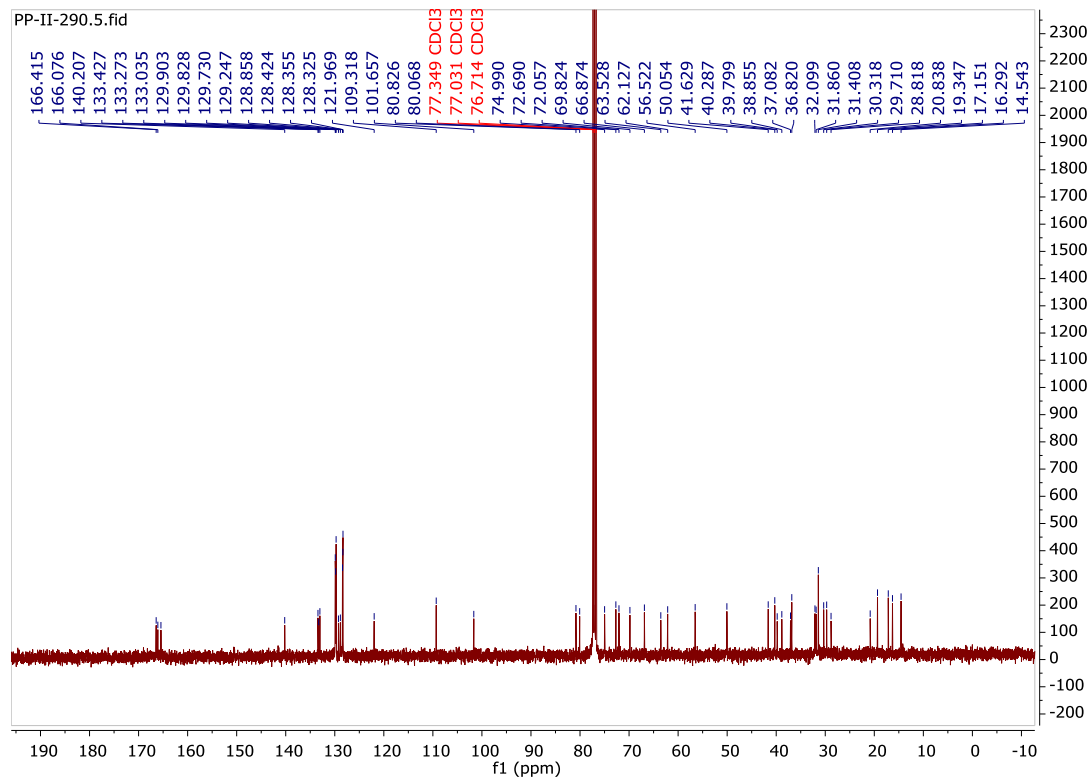

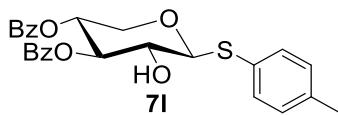

$^1\text{H NMR}$  ( $\text{CDCl}_3$ , 400 MHz) of **71**

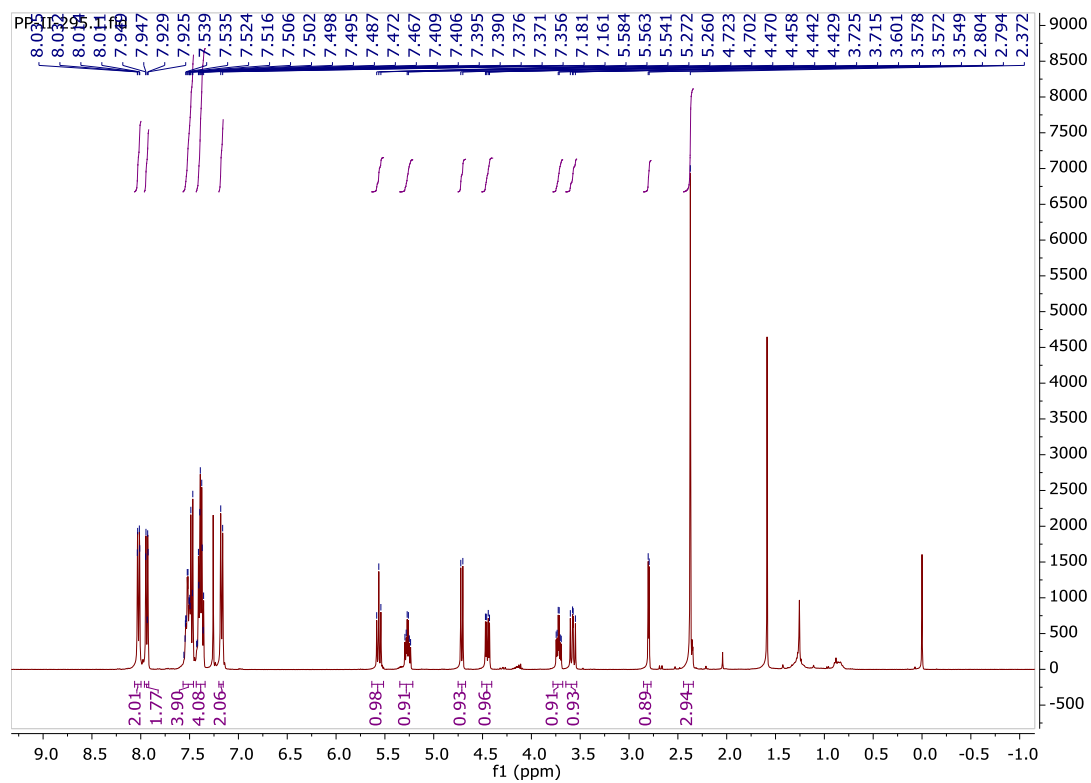

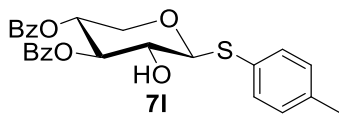

gCOSY (CDCl<sub>3</sub>, 400 MHz) of 71

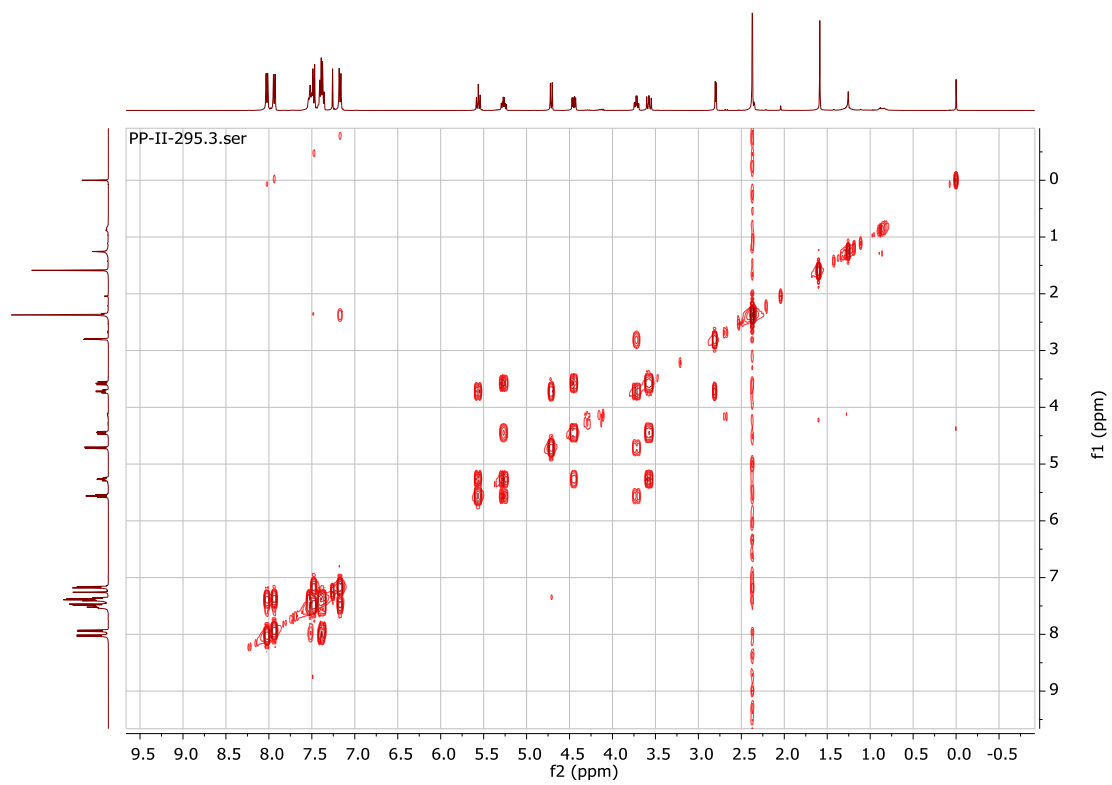

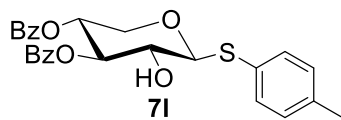

gHSQC (CDCl<sub>3</sub>, 400 MHz) of 71

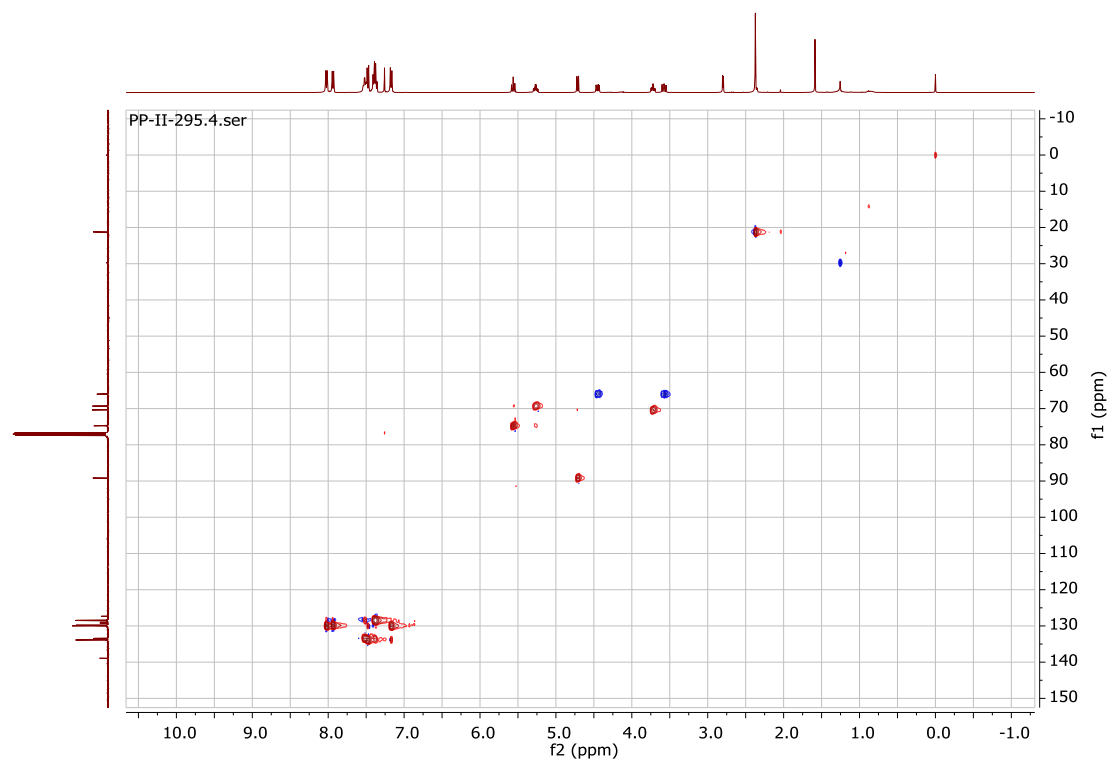

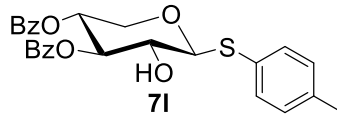

$^{13}\text{C}$  NMR ( $\text{CDCl}_3$ , 101 MHz) of 71

PP-II-295.5.fid

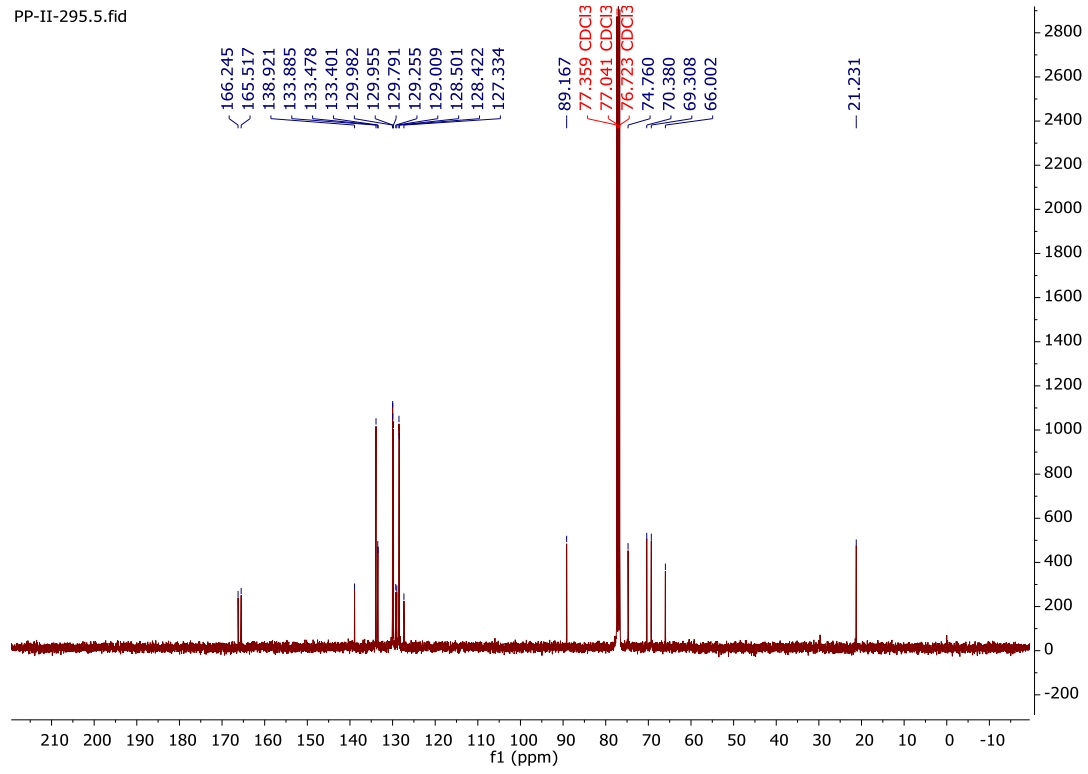



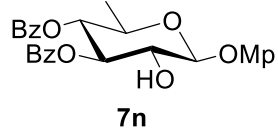

<sup>1</sup>H NMR (CDCl<sub>3</sub>, 400 MHz) of **7n**

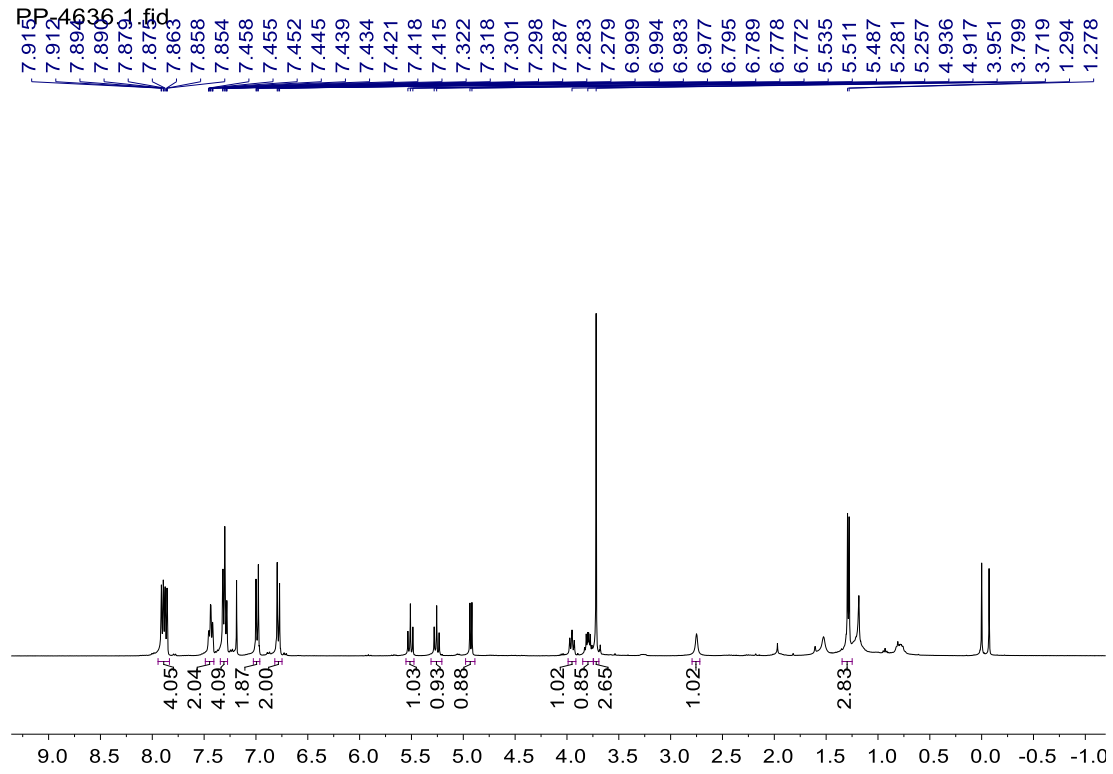

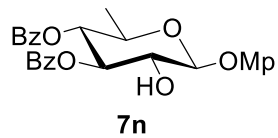

gCOSY (CDCl<sub>3</sub>, 400 MHz) of **7n**

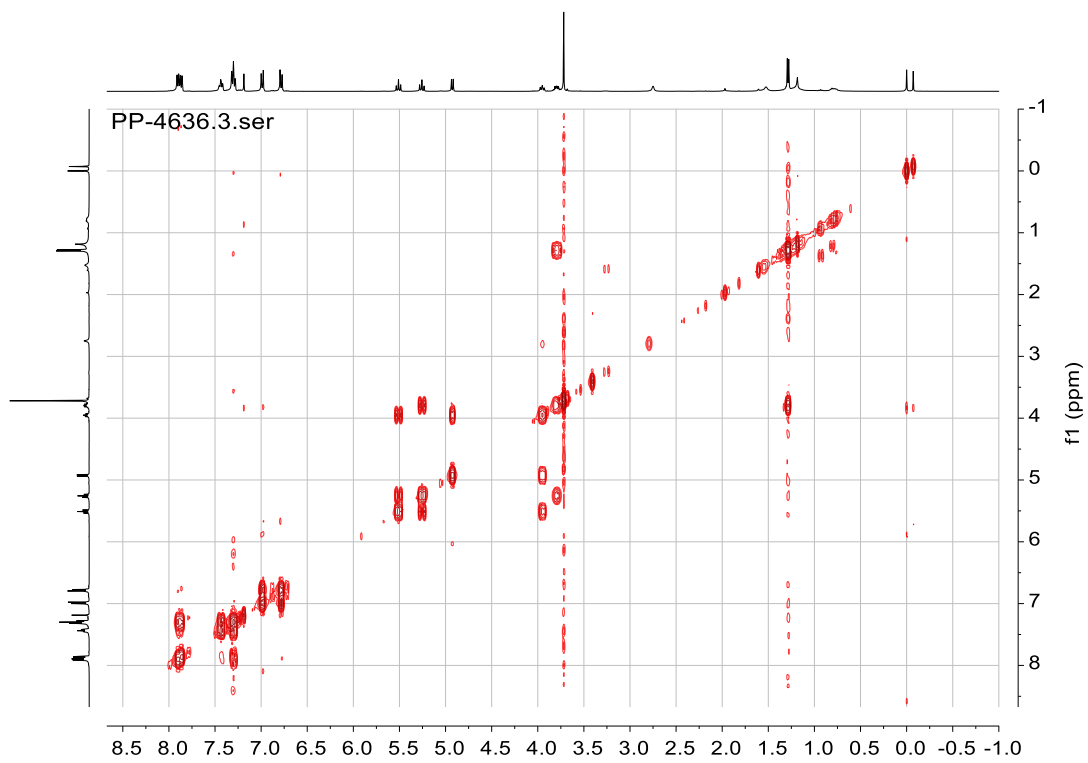



gHSQC (CDCl<sub>3</sub>, 400 MHz) of **7n**

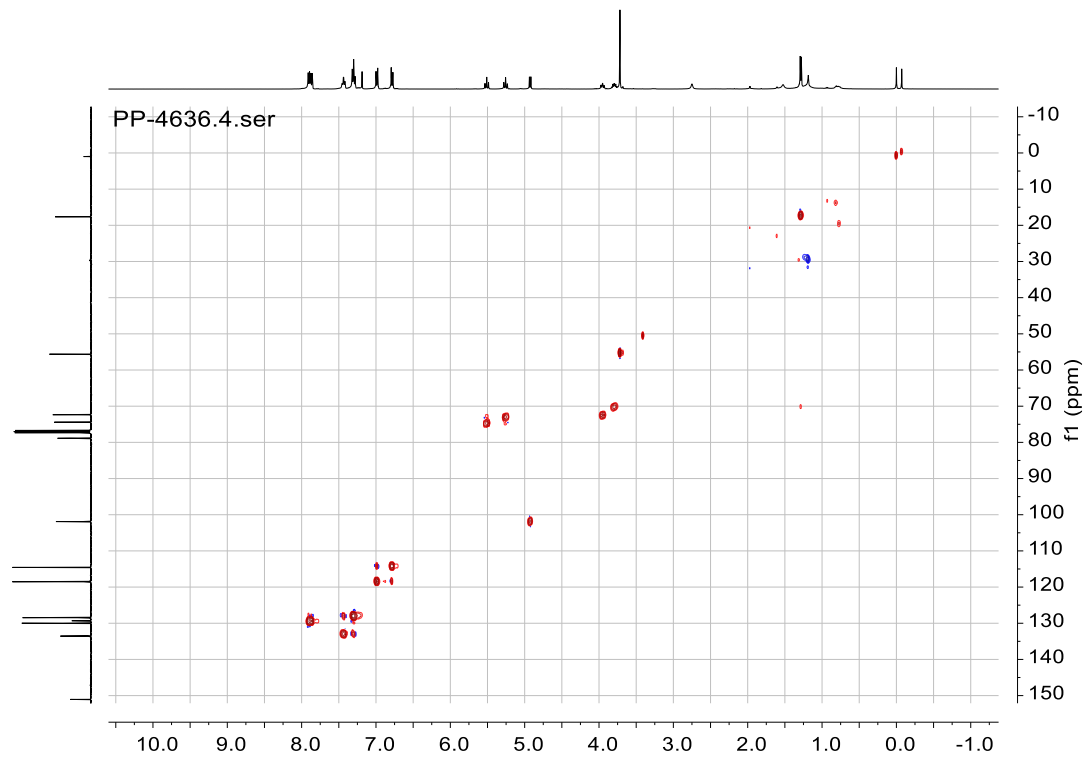

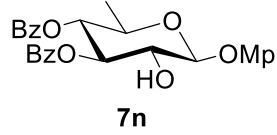

$^{13}\text{C}$  NMR ( $\text{CDCl}_3$ , 101 MHz) of **7n**

PP-4636.5.fid

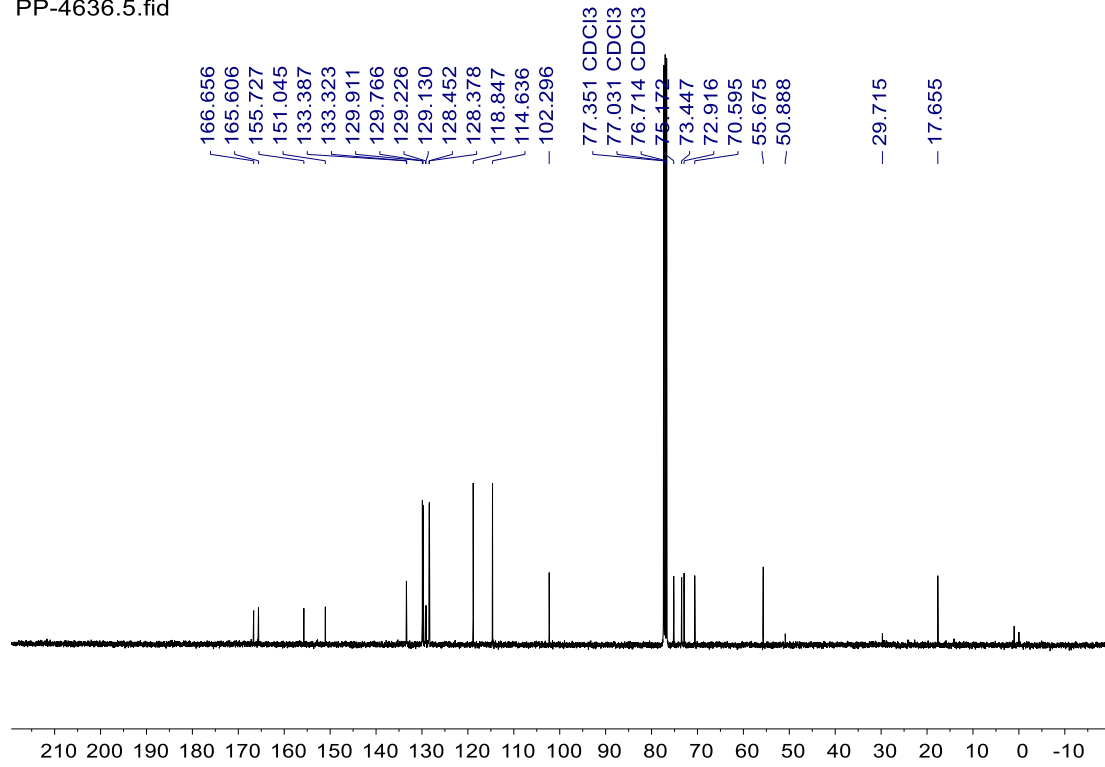

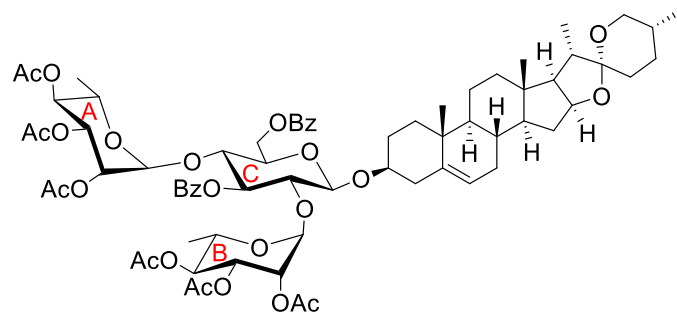

11

$^1\text{H NMR}$  ( $\text{CDCl}_3$ , 400 MHz) of **11**

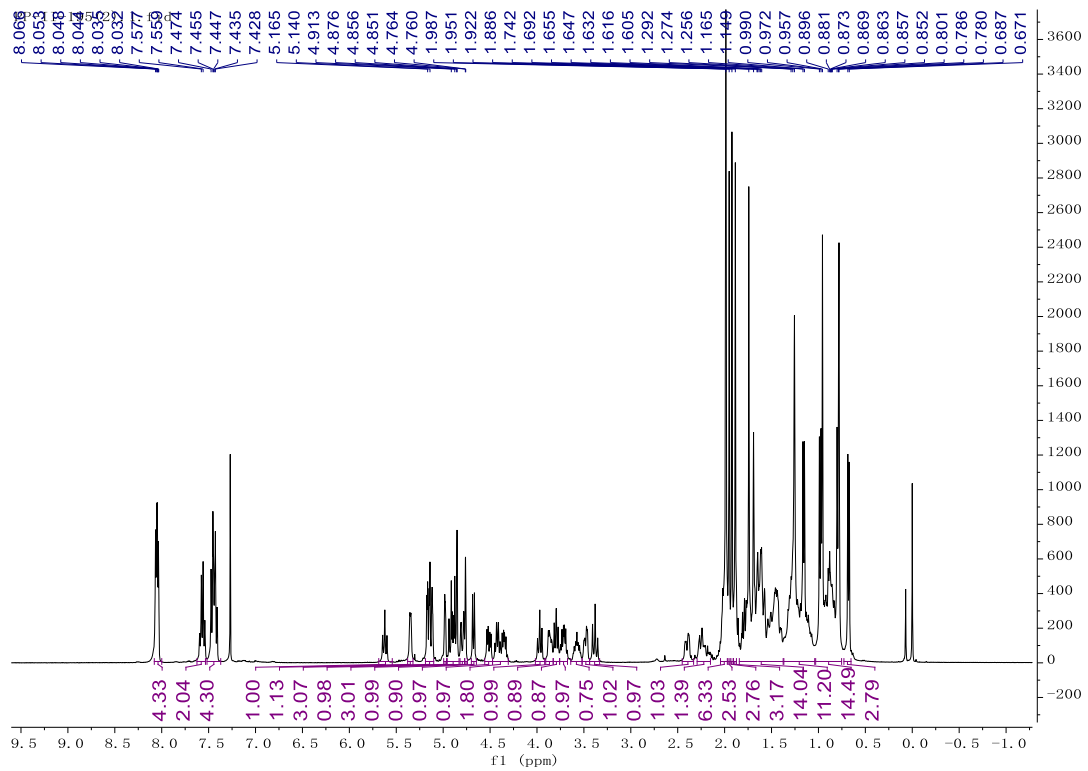

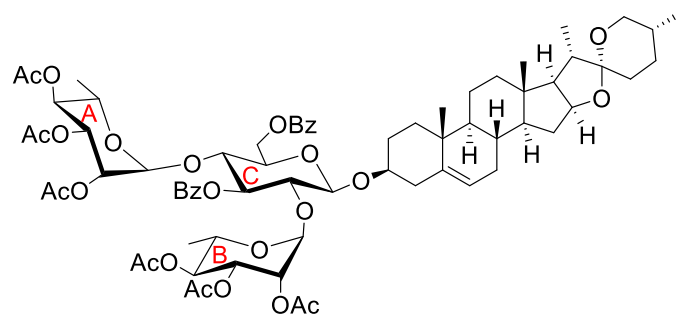

11

gCOSY (CDCl<sub>3</sub>, 400 MHz) of 11

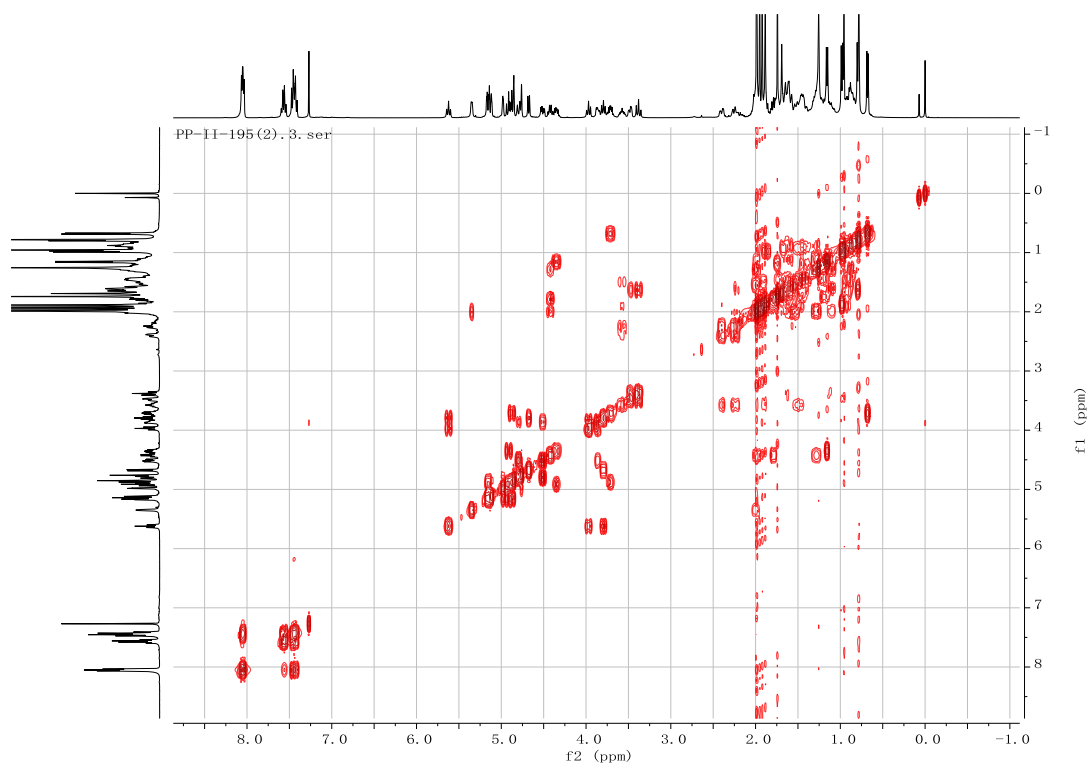

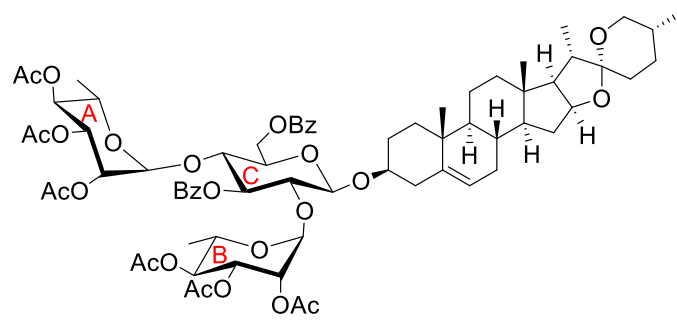

11

gHSQC (CDCl<sub>3</sub>, 400 MHz) of 11

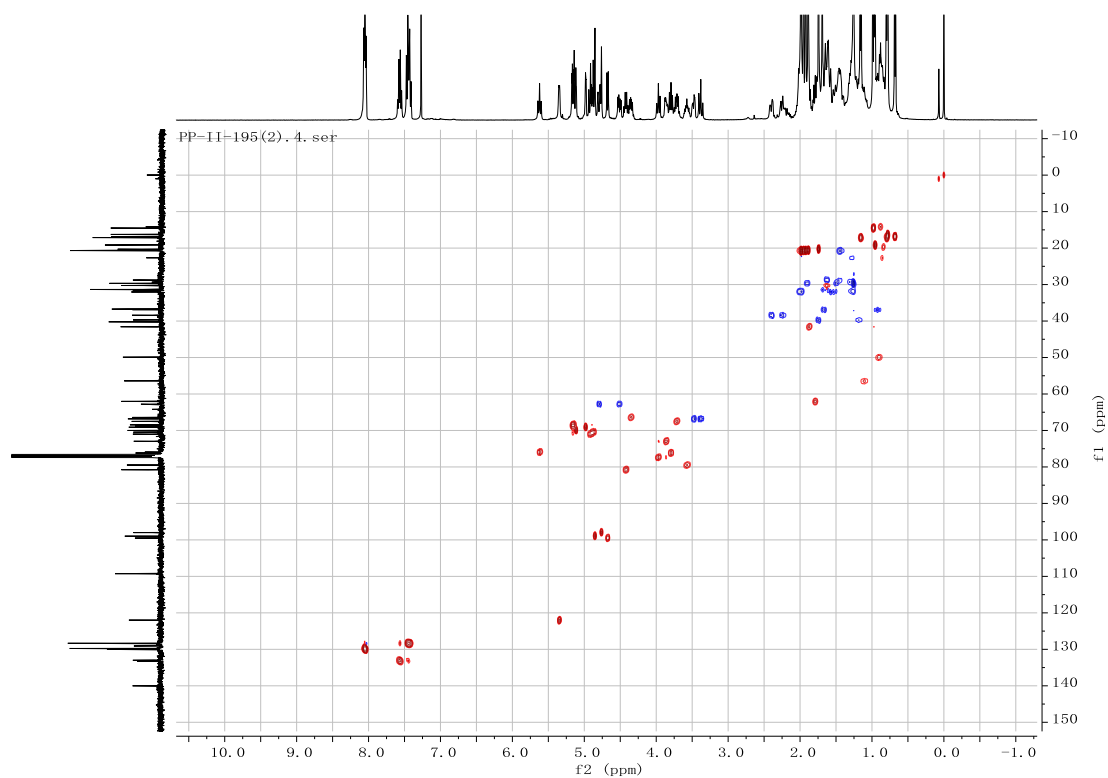

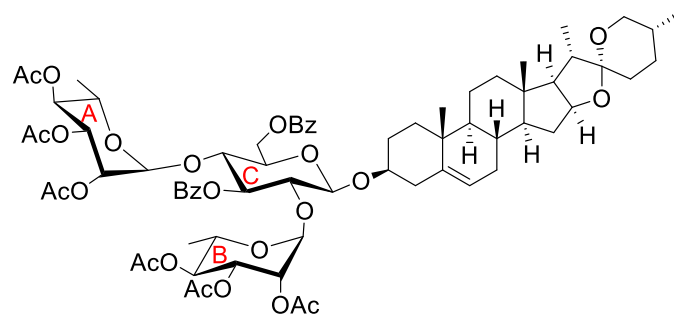

11

$^{13}\text{C}$  NMR ( $\text{CDCl}_3$ , 101 MHz) of 11

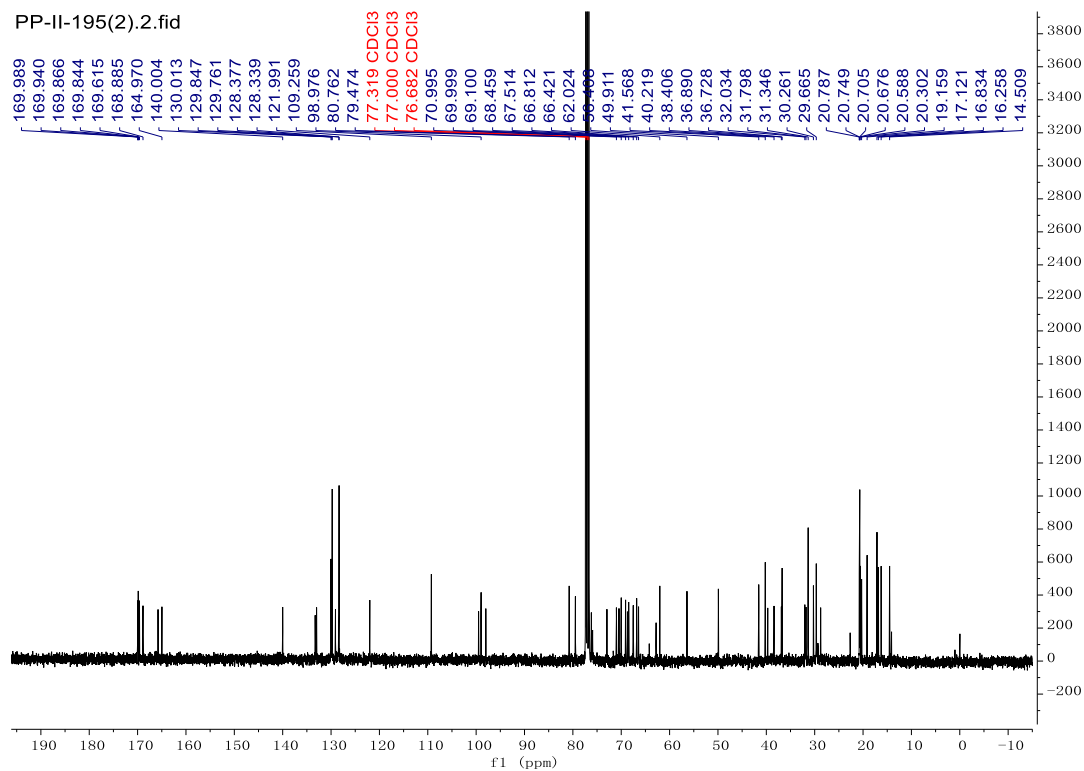



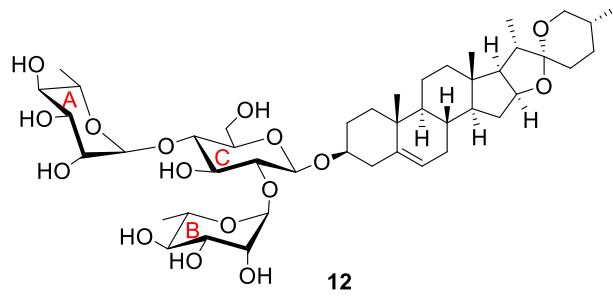

<sup>1</sup>H NMR (CDCl<sub>3</sub>, 400 MHz) of **12**

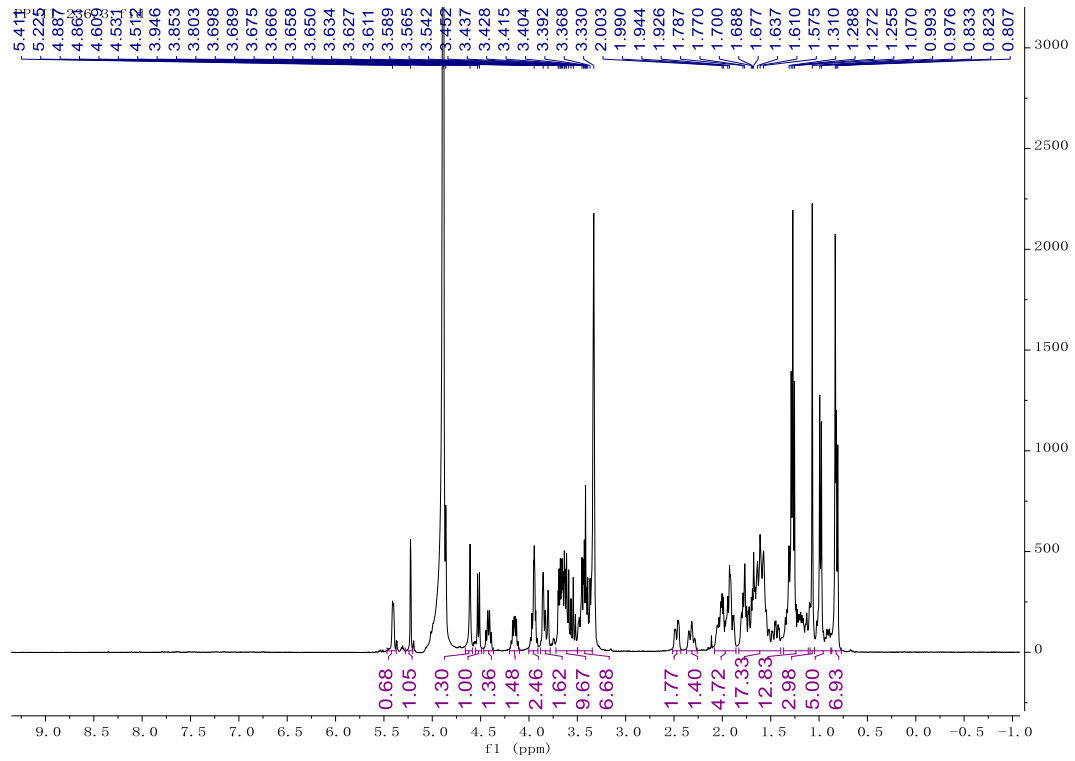

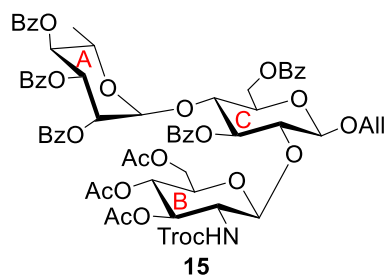

<sup>1</sup>H NMR (CDCl<sub>3</sub>, 400 MHz) of **15**

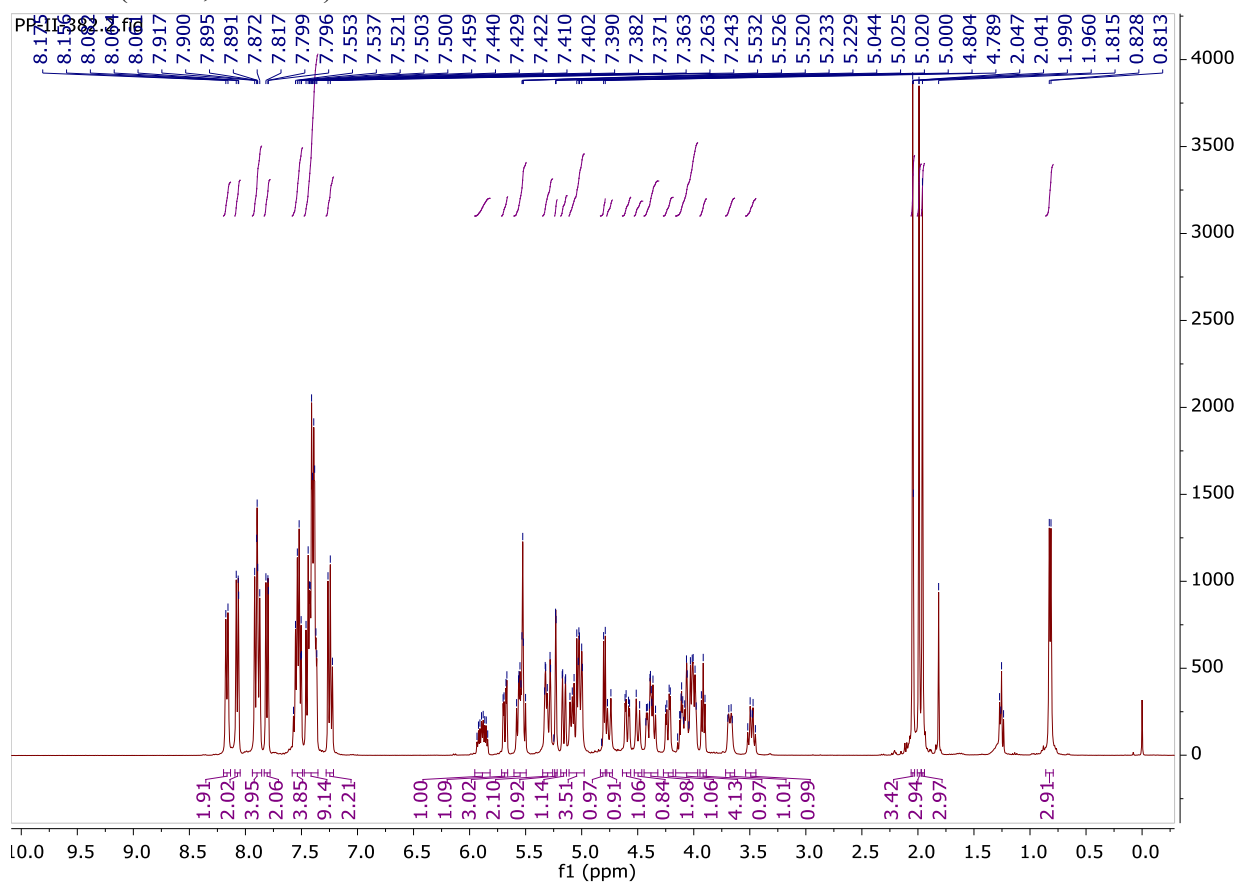

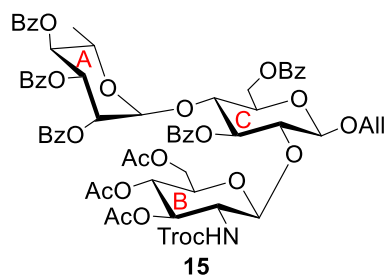

gCOSY (CDCl<sub>3</sub>, 400 MHz) of **15**

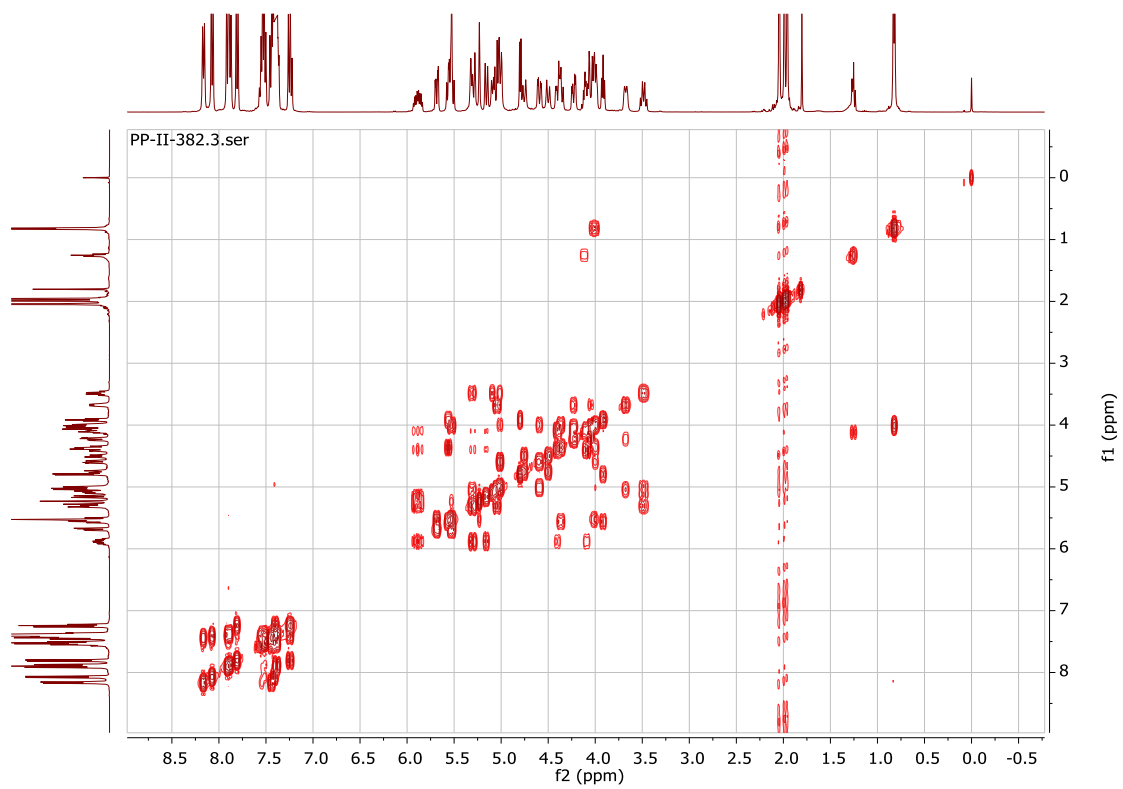

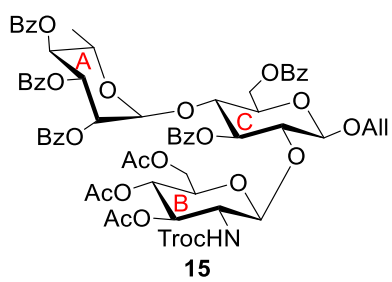

gHSQC (CDCl<sub>3</sub>, 400 MHz) of **15**

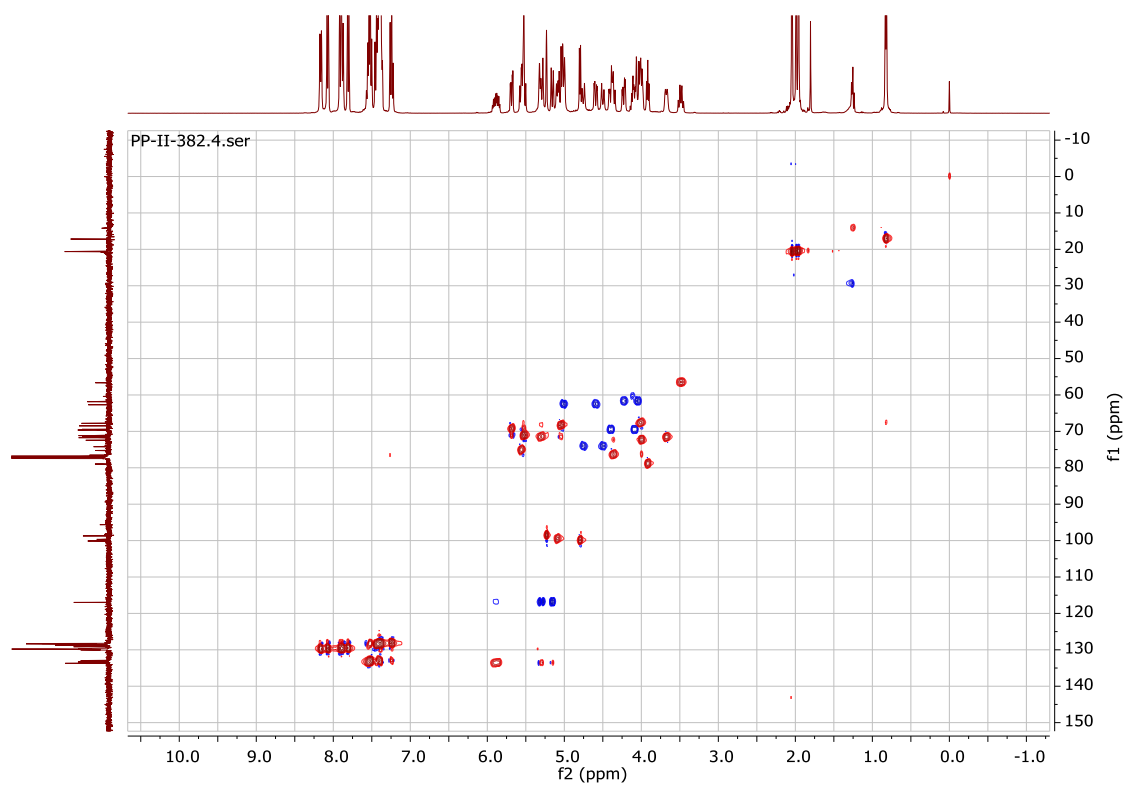

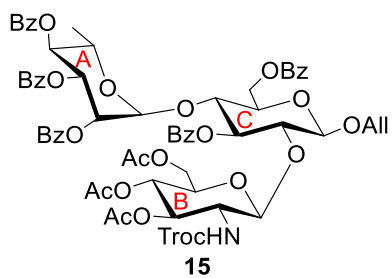

Coupled gHSQC (CDCl<sub>3</sub>, 400 MHz) of **15**

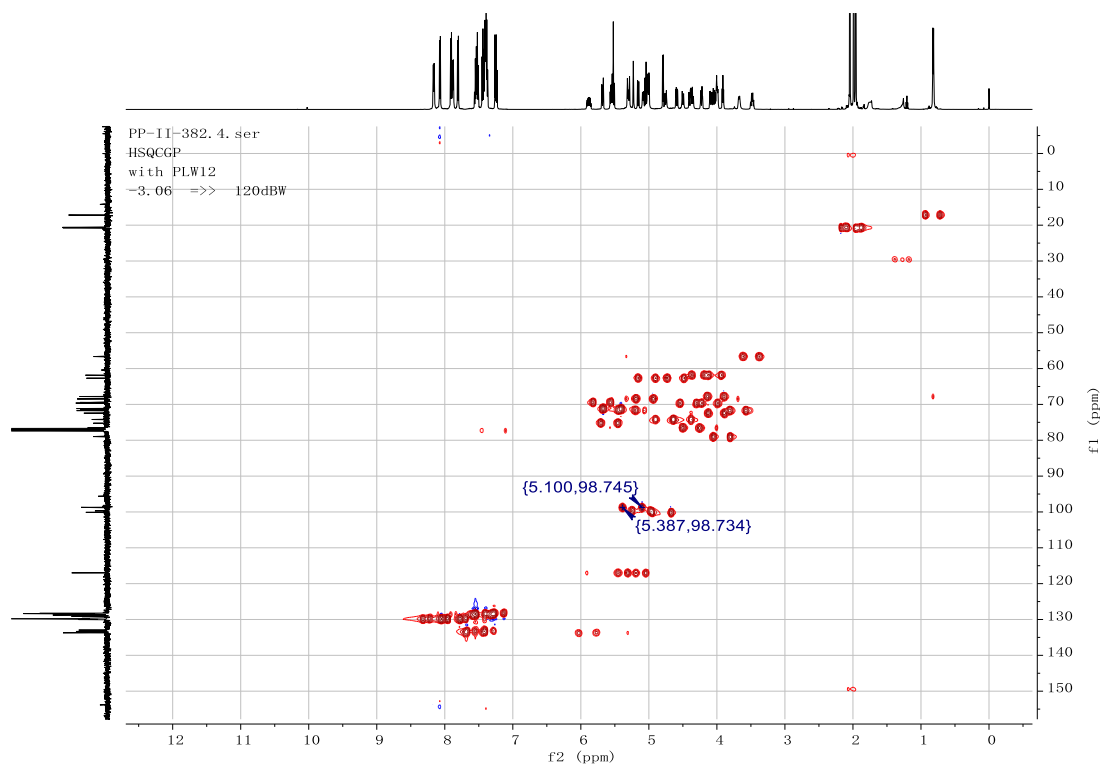



$^{13}\text{C}$  NMR ( $\text{CDCl}_3$ , 101 MHz) of **15**

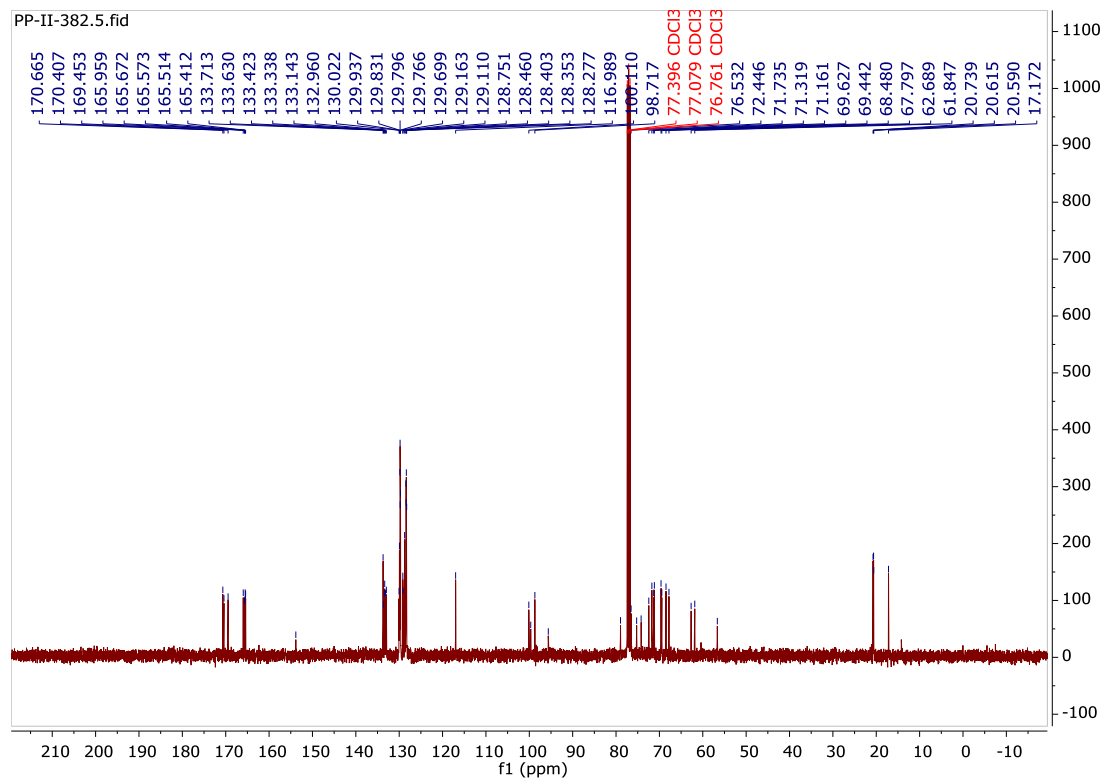

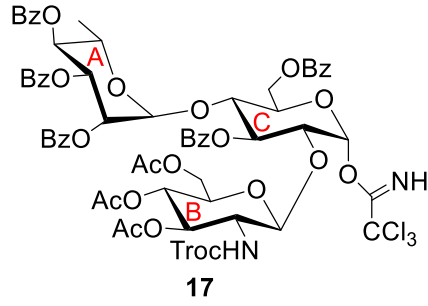

<sup>1</sup>H NMR (CDCl<sub>3</sub>, 400 MHz) of **17**

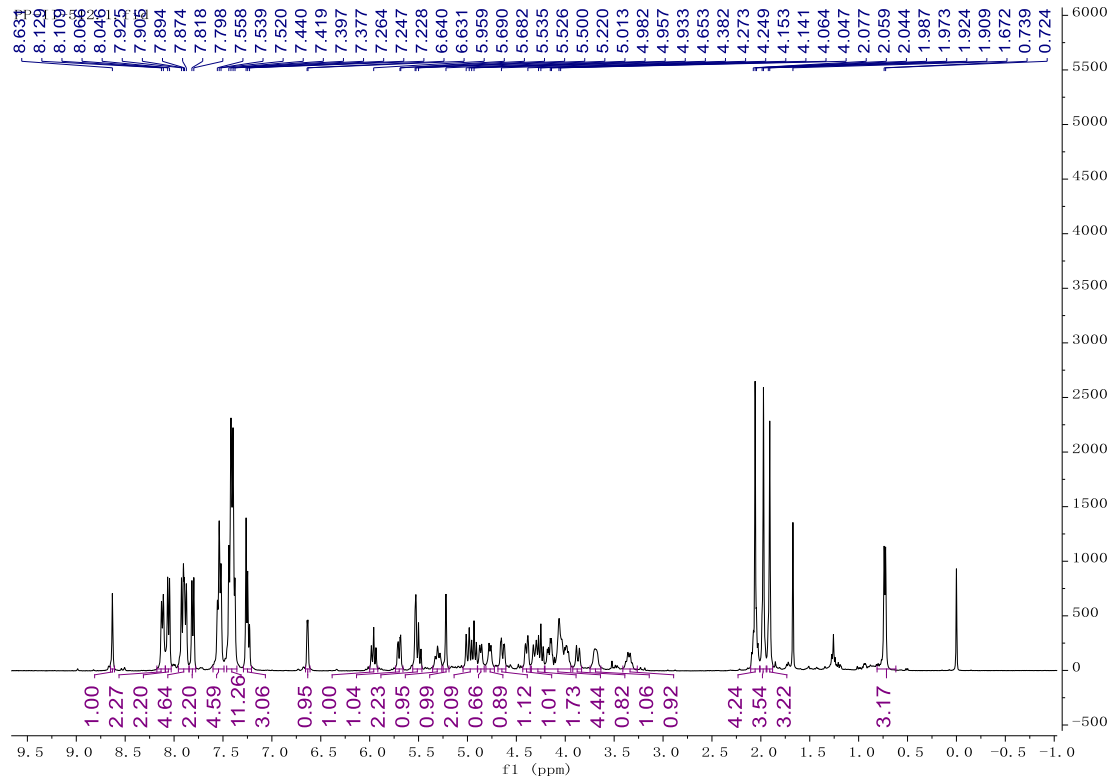

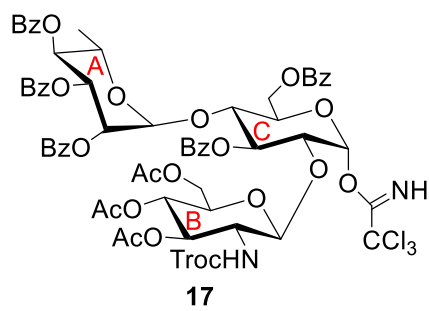

gCOSY (CDCl<sub>3</sub>, 400 MHz) of **17**

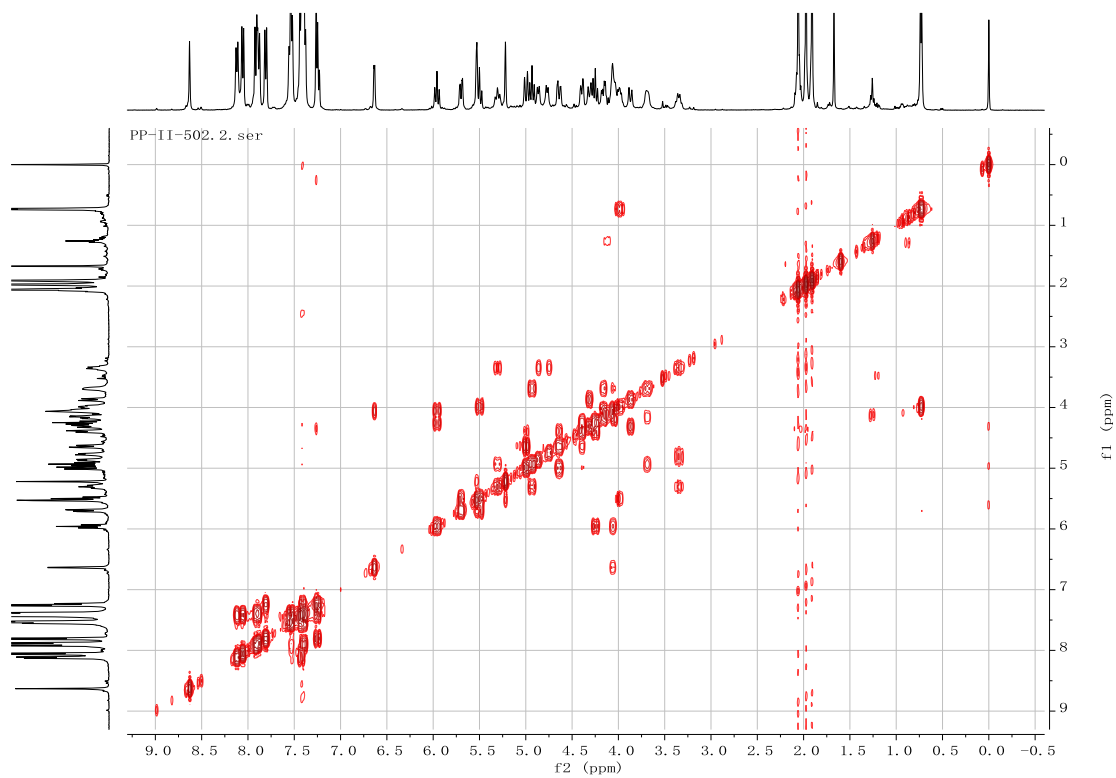



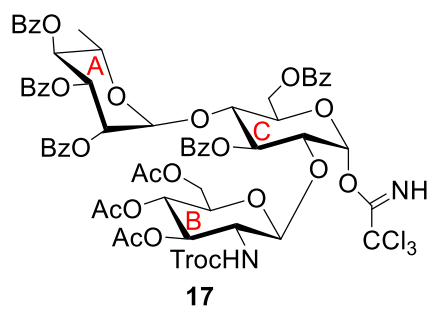

gHSQC (CDCl<sub>3</sub>, 400 MHz) of **17**

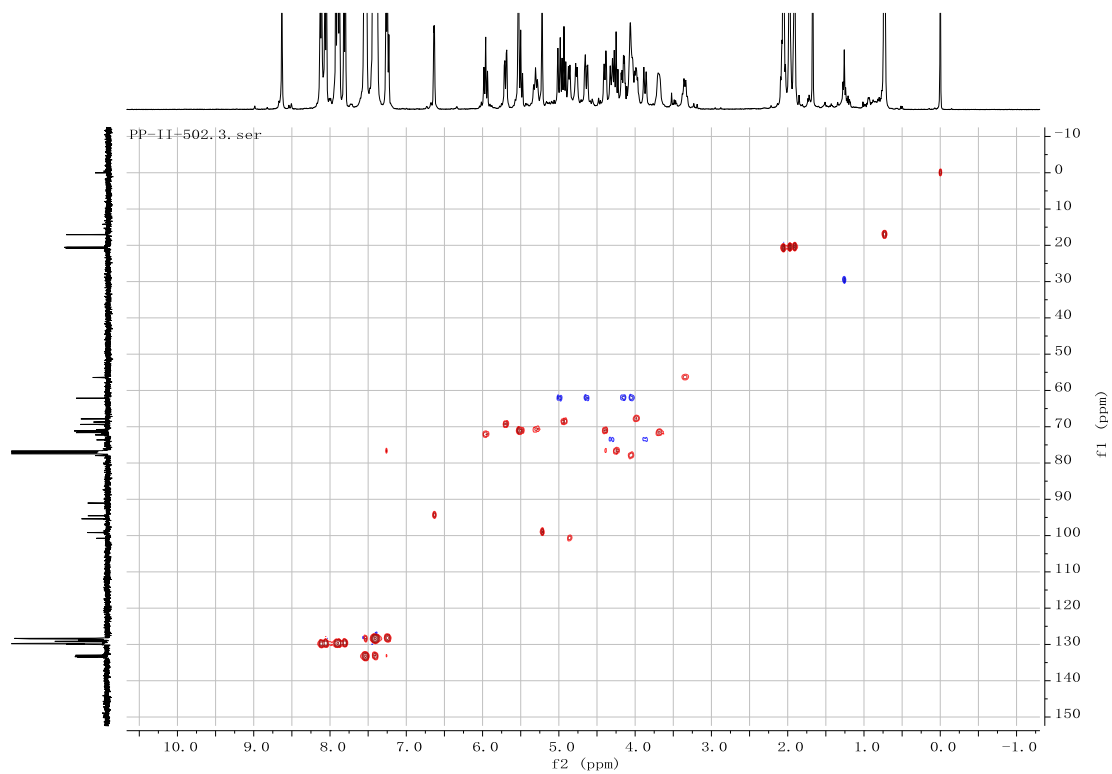



<sup>13</sup>C NMR (CDCl<sub>3</sub>, 101 MHz) of **17**

PP-II-512. 2. fid

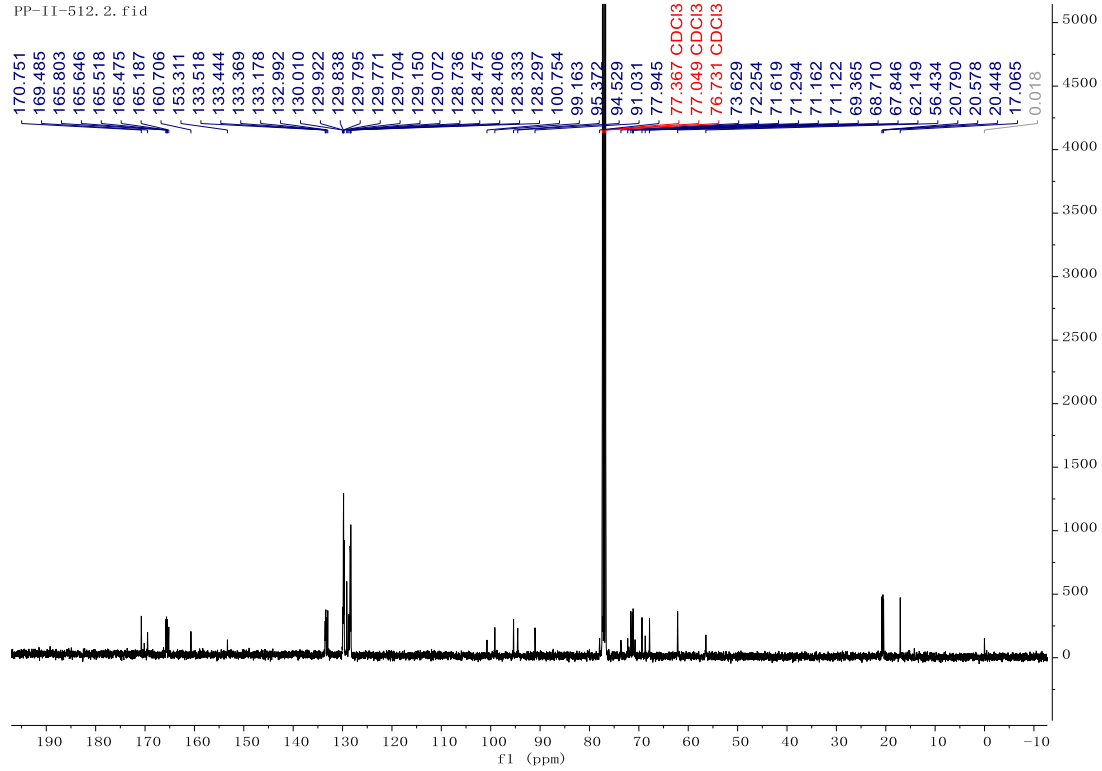

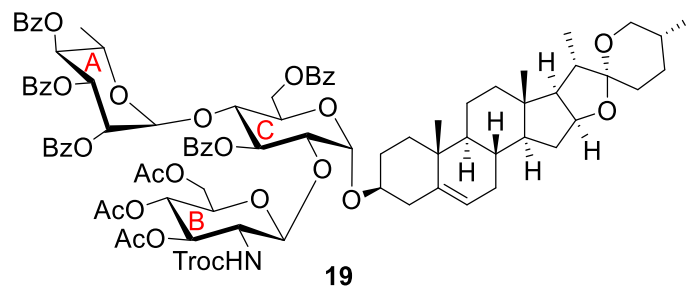

<sup>1</sup>H NMR (CDCl<sub>3</sub>, 400 MHz) of **19**

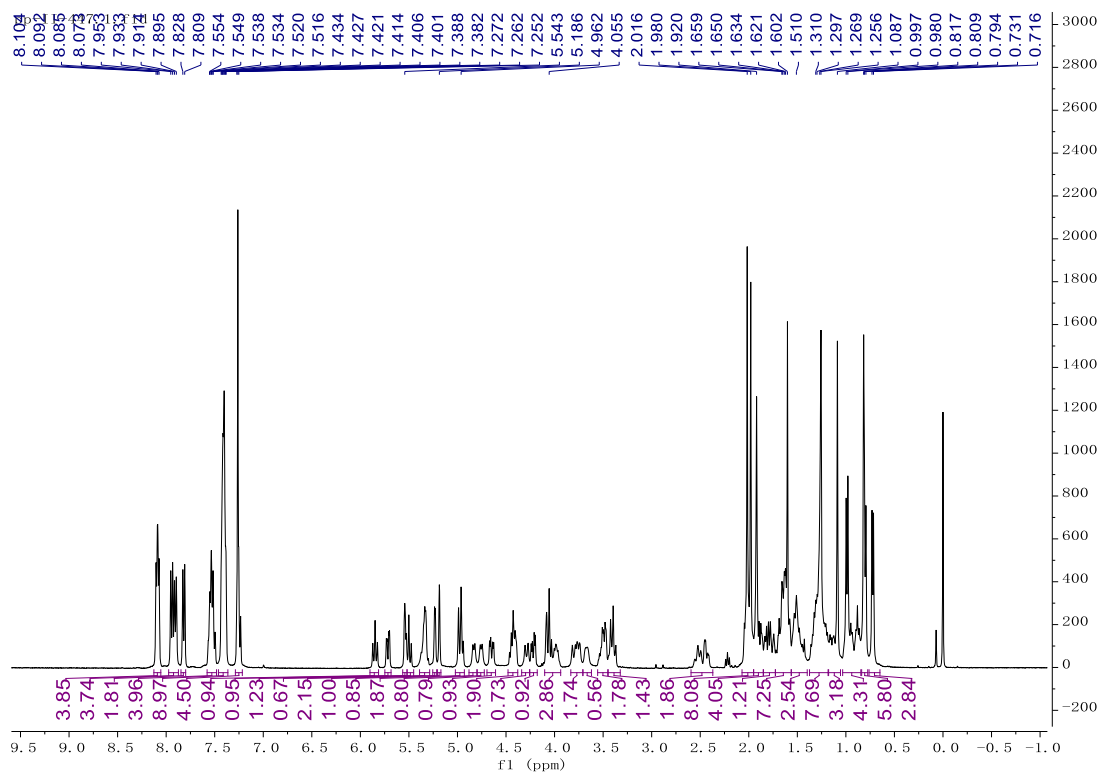



gCOSY (CDCl<sub>3</sub>, 400 MHz) of **19**

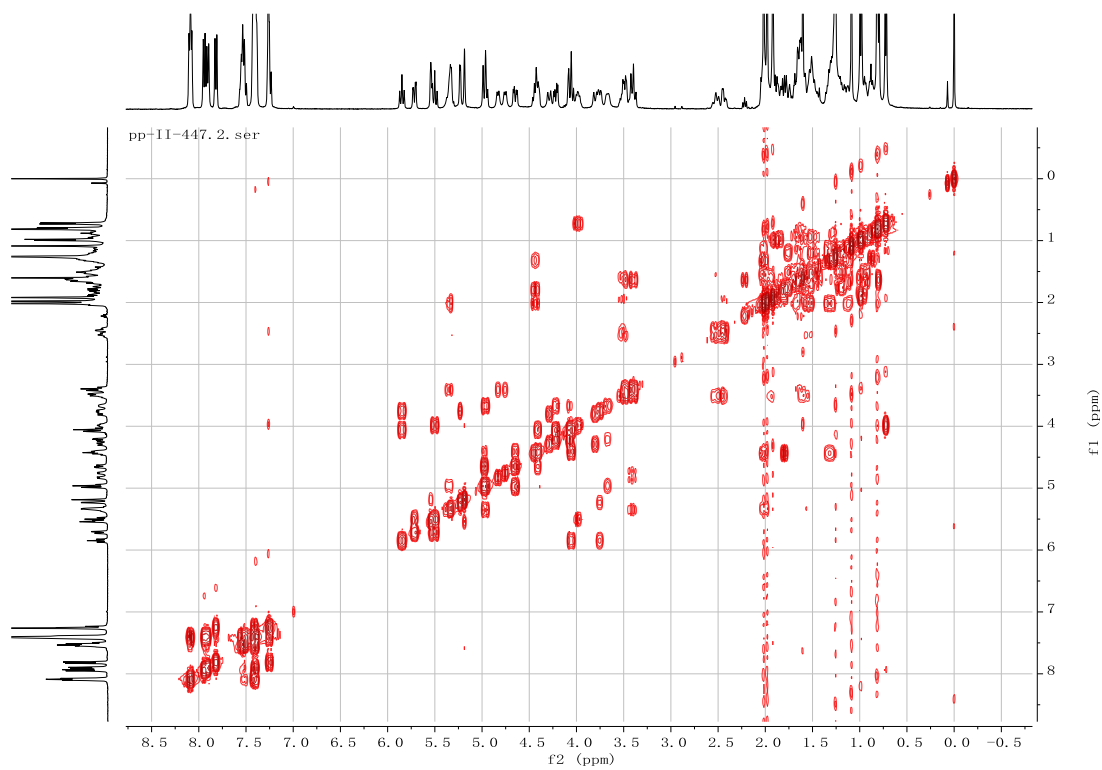

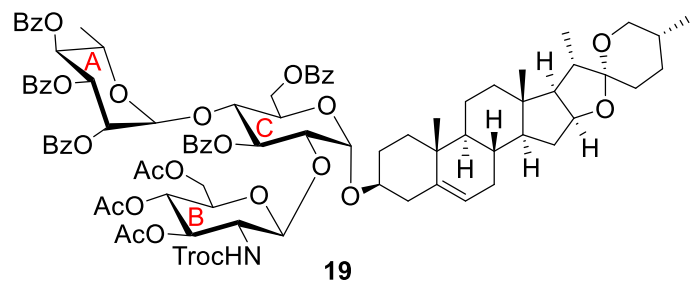

gHSQC (CDCl<sub>3</sub>, 400 MHz) of **19**

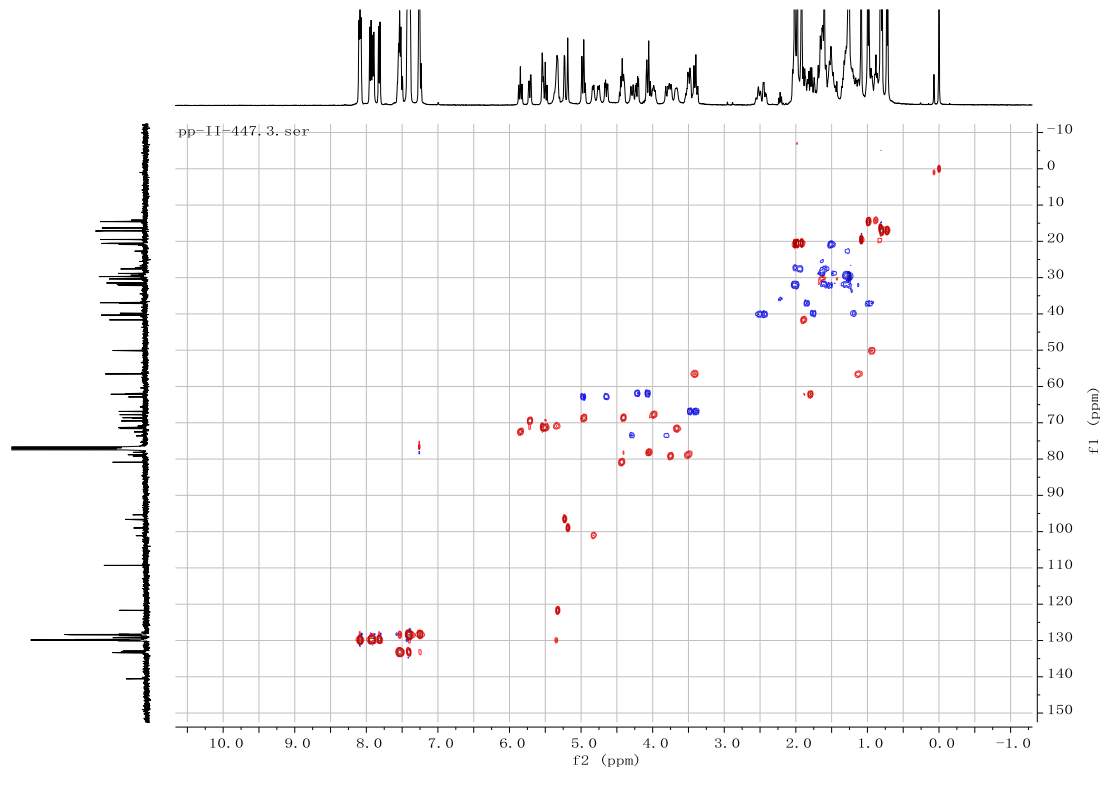



<sup>13</sup>C NMR (CDCl<sub>3</sub>, 101 MHz) of 19

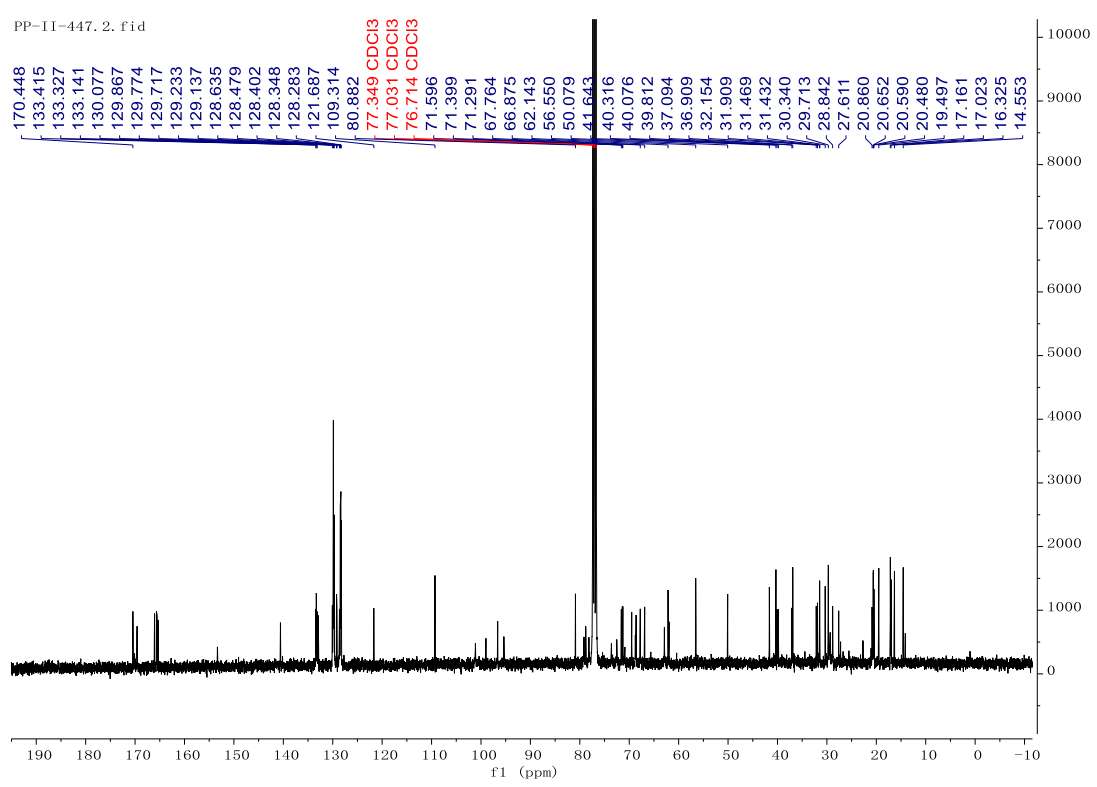

Supplement: d0qo01243b1.pdf [file d0qo01243b1.pdf]
